# Supplementary material
Source: PubMed Central journal article supplement (PMC6900872)
Supplement: NIHMS1060711-supplement-pdf.pdf [file NIHMS1060711-supplement-pdf.pdf]

# Alkyl radical addition to aliphatic and aromatic *N*-acylhydrazones using an organic photoredox catalyst

By Stephen T.J. Cullen and Gregory K. Friestad\*

Department of Chemistry, University of Iowa

\*Corresponding Author; [gregory-friestad@uiowa.edu](mailto:gregory-friestad@uiowa.edu)

## Supporting Information

### Table of Contents

|                                                                    |     |
|--------------------------------------------------------------------|-----|
| Materials and Methods                                              | S2  |
| Photoreactor Assembly                                              | S2  |
| Synthesis of <i>N</i> -acylhydrazones                              | S3  |
| Synthesis of Ammonium Biscatecholatoalkylsilicate Salts and 4CzIPN | S4  |
| General Procedure for Radical Additions to Hydrazones              | S4  |
| Full Optimization of Radical Addition                              | S5  |
| Determination of Percent Conversion of <b>2a</b>                   | S6  |
| Experimental Details of Radical Addition Reactions                 | S7  |
| Reductive Cleavage of N-N bond                                     | S16 |
| Formal Synthesis of Racemic Repaglinide                            | S17 |
| Spectral Data for New Compounds                                    | S20 |

## Materials and Methods

New scintillation vials were employed in radical addition reactions, and all other reactions were performed in oven dried glassware with magnetic stirring. Radical addition reactions were performed under static argon atmosphere. DMSO used for reactions was purchased in a bottle sealed under argon, used without further purification. THF was degassed with argon and passed through columns of activated alumina prior to use. Argon was passed through columns of  $\text{CaSO}_4$  and R3-11 catalyst for removal of water and oxygen, respectively. Reagents were used without further purification.  $\text{CDCl}_3$  for NMR spectroscopy was passed through a column of basic alumina. Thin layer chromatography employed glass 0.25 mm silica gel plates with UV indicator. TLC plates were visualized with either UV lamp or phosphomolybdic acid stain. Flash chromatography columns were packed with 230-400 mesh silica gel loaded as a slurry in eluting solvent. Crude material was loaded onto columns as a solution in eluting solvent (with added  $\text{CH}_2\text{Cl}_2$  to aid in solubility as needed). Columns for purifying radical addition products were buffered with ~1%  $\text{Et}_3\text{N}$  in loading slurries and eluting solvents. HRMS was run by independent facility at the University of Iowa. Melting point ranges were obtained using a Meltemp apparatus and are uncorrected.

### Photoreactor Assembly

The photoreactor<sup>1</sup> depicted at right was built with 470 nm LED strips (60 LED/m, 1 m) purchased from superbrightleds.com and fitted with 12V power supplies. Two LED strips were adhered to the inside of a crystallizing dish, the outside of which was

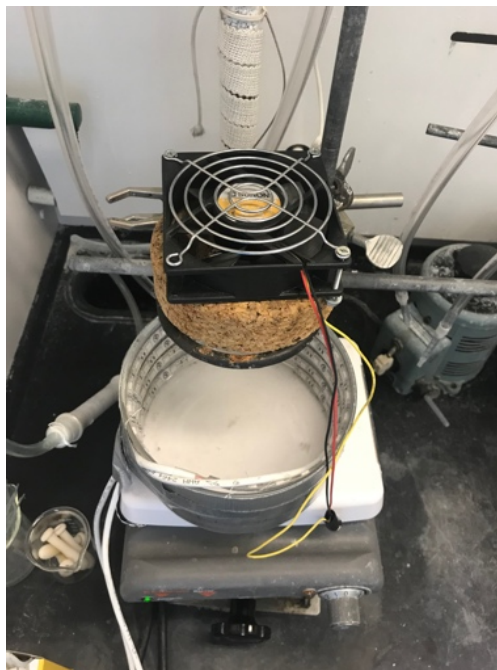

covered with duct tape. During photoredox reactions, the reactor was surrounded by aluminum foil to contain the light, and the temperature was stabilized through use of either a small fan or compressed air.

## Synthesis of *N*-acylhydrazones

Compounds **1a-b** and **6a-h** were synthesized by known procedures, and characterization data matched prior reports.<sup>1-2</sup>

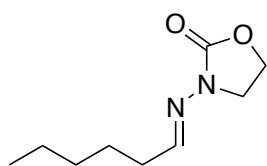

**3-(Hexylidene)amino-2-oxazolidinone (1c):** To a mixture of 3-amino-2-oxazolidinone (0.4286 g, 4.20 mmol, 1.00 eq) and MgSO<sub>4</sub> (0.75 g) in 10 mL of CH<sub>2</sub>Cl<sub>2</sub> was added hexanal (1.00 mL, 8.14 mmol, 1.94 eq),

followed by *p*-TsOH·H<sub>2</sub>O (100 mg, 0.526 mmol, 0.125 eq). After 19h, filtration, concentration, and gradient flash chromatography (hexanes and EtOAc, 6:1 hex:EtOAc → 1:1) furnished the title compound (0.4956 g, 64% yield) as a colorless oil. HRMS(ESI) *m/z* calcd for C<sub>9</sub>H<sub>16</sub>N<sub>2</sub>O<sub>2</sub>Na 207.1109 ([M+Na]<sup>+</sup>), found 207.1120; <sup>1</sup>H NMR (300 MHz, CDCl<sub>3</sub>) δ 7.05-7.02 (t, *J* = 5.7 Hz, 1H), 4.51-4.46 (m, 2H), 3.80-3.75 (m, 2H), 2.43-2.36 (td, *J* = 7.5, 9.5 Hz, 2H), 1.56-1.50 (m, 2H), 1.36-1.30 (m, 4H), 0.89 (t, *J* = 7.0 Hz, 3H); <sup>13</sup>C NMR {<sup>1</sup>H} (75 MHz, CDCl<sub>3</sub>) δ 154.8, 149.0, 61.4, 42.4, 32.8, 31.5, 26.7, 22.5, 14.1.

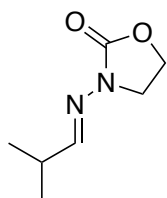

**3-(2-Methylpropylidene)amino-2-oxazolidinone (1d):** Using the procedure for the synthesis of **1c**, from 3-amino-2-oxazolidinone (0.1954 g, 1.91 mmol, 1.00 eq) and isobutyraldehyde (0.90 mL, 9.9 mmol, 5.2 eq) was obtained the title

compound (0.1833 g, 61% yield) as a colorless solid. mp 51-53°C; HRMS(ESI) *m/z* calcd for C<sub>7</sub>H<sub>12</sub>N<sub>2</sub>O<sub>2</sub>Na 179.0796 ([M+Na]<sup>+</sup>), found 179.0791; <sup>1</sup>H NMR (300 MHz, CDCl<sub>3</sub>) δ 6.90 (d, *J* =

6.1 Hz, 1H), 4.48 (t,  $J = 8.1$  Hz, 2H), 3.76 (t,  $J = 8.1$  Hz, 2H), 2.78-2.62 (m, 1H), 1.13 (d,  $J = 6.9$  Hz, 6H);  $^{13}\text{C}$  NMR  $\{^1\text{H}\}$  (75 MHz,  $\text{CDCl}_3$ )  $\delta$  154.7, 153.5, 61.3, 42.3, 31.9, 20.2.

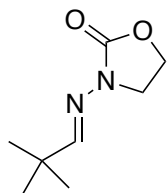

**3-(2,2-Dimethylpropylidene)amino-2-oxazolidinone (1e):** Using the procedure for the synthesis of **1c**, from 3-amino-2-oxazolidinone (0.4135 g, 4.05 mmol, 1.00 eq) and pivalaldehyde (0.80 mL, 7.4 mmol, 1.82 eq) was obtained the title

compound (0.5808 g, 84% yield) as a colorless solid. mp 142-144°C; HRMS(ESI)  $m/z$  calcd for  $\text{C}_8\text{H}_{14}\text{N}_2\text{O}_2\text{Na}$  193.0953 ( $[\text{M}+\text{Na}]^+$ ), found 193.0946;  $^1\text{H}$  NMR (300 MHz,  $\text{CDCl}_3$ )  $\delta$  6.97 (s, 1H), 4.47 (t,  $J = 7.8$  Hz, 2H), 3.76 (t,  $J = 7.8$  Hz, 2H), 1.15 (s, 9);  $^{13}\text{C}$  NMR  $\{^1\text{H}\}$   $\delta$  156.2, 154.7, 61.3, 42.5, 35.3, 27.7.

## Synthesis of Ammonium Biscatecholatoalkylsilicate Salts and 4CzIPN

Alkylsilicate salts were prepared from the corresponding trimethoxysilanes, and characterization data matched that reported previously.<sup>3</sup>

The photocatalyst 4CzIPN was prepared and characterized as previously reported.<sup>4</sup>

## General Procedure A: Radical Additions to Hydrazones

A scintillation vial containing hydrazone (0.1 M in DMSO), and  $\text{MgCl}_2$  was capped under Ar and allowed to stir. After 1 h, the appropriate bis(catecolato)alkylsilicate was added along with catalyst 4CzIPN. The vial was capped under Ar, sealed with Parafilm or electrical tape, and irradiated at 470 nm with the LED photoreactor (p. S2) at ca. 30°C. After 42–48 h, the reaction mixture was partitioned between EtOAc and  $\text{H}_2\text{O}$ . The organic phase was washed with 10% aq KOH and brine, dried (either  $\text{Na}_2\text{SO}_4$  or  $\text{MgSO}_4$ ), and concentrated. Percent conversion was determined by  $^1\text{H}$  NMR integration of the crude product (detailed in next section). Gradient flash

chromatography (hexanes/EtOAc or hexanes/Et<sub>2</sub>O, buffered with ~1% Et<sub>3</sub>N) afforded the target compounds.

**Table S1. Additional Conditions Screened for Radical Addition**

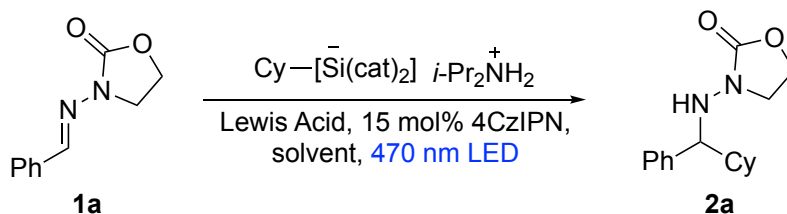

| entry | Lewis Acid<br>(2 eq.)   | Eq. silicate | Solvent | Time (h) | % conv. <sup>a</sup>  |
|-------|-------------------------|--------------|---------|----------|-----------------------|
| 1     | none                    | 2            | DMSO    | 24       | 40                    |
| 2     | none                    | 2            | DMSO    | 49       | 48                    |
| 3     | ZnBr <sub>2</sub>       | 1            | DMSO    | 18       | 27                    |
| 4     | Zn(OTf) <sub>2</sub>    | 1            | DMSO    | 18       | 27                    |
| 5     | CuCl <sub>2</sub>       | 1            | DMSO    | 18       | 0                     |
| 6     | ZnBr <sub>2</sub>       | 2            | DMSO    | 18       | 63                    |
| 7     | ZnBr <sub>2</sub>       | 4            | DMSO    | 18       | 64                    |
| 8     | 3 eq. ZnBr <sub>2</sub> | 2            | DMSO    | 18       | 49                    |
| 9     | Sc(OTf) <sub>3</sub>    | 2            | DMSO    | 18       | 23                    |
| 10    | AlCl <sub>3</sub>       | 2            | DMSO    | 18       | 40                    |
| 11    | MgCl <sub>2</sub>       | 2            | DMSO    | 18       | 59                    |
| 12    | MgBr <sub>2</sub>       | 2            | DMSO    | 18       | 54                    |
| 13    | Mg(OTf) <sub>2</sub>    | 2            | DMSO    | 18       | 31                    |
| 14    | InCl <sub>3</sub>       | 2            | DMSO    | 18       | 33                    |
| 15    | ZnBr <sub>2</sub>       | 2            | DMF     | 16       | 28                    |
| 16    | MgCl <sub>2</sub>       | 2            | DMF     | 16       | 44                    |
| 17    | MgCl <sub>2</sub>       | 1.2          | EtOH    | 23       | 10                    |
| 18    | MgCl <sub>2</sub>       | 2.6          | DMSO    | 48       | 86                    |
| 19    | MgCl <sub>2</sub>       | 1.3          | DMSO    | 22       | 63                    |
| 20    | MgCl <sub>2</sub>       | 3            | DMSO    | 48       | 22 <sup>b</sup>       |
| 21    | MgCl <sub>2</sub>       | 3            | DMSO    | 48       | 68 <sup>c</sup>       |
| 22    | MgCl <sub>2</sub>       | 3            | DMSO    | 47       | 88 (60 <sup>d</sup> ) |
| 23    | MgCl <sub>2</sub>       | 2            | DMSO    | 24       | 73                    |

<sup>a</sup> Determined by <sup>1</sup>H NMR integration. <sup>b</sup> 1 mol% catalyst loading. <sup>c</sup> 5 mol% catalyst loading. <sup>d</sup> Isolated yield.

## Determination of Percent Conversion of 2a

Percent conversions of hydrazone **1a** to radical addition product **2a** are reported in Table S1.

Insignificant amounts of other products from **1a** were observed, so that the percent conversion could be reasonably estimated from <sup>1</sup>H NMR integrals of oxazolidinone peaks from **1a** and **2a**.

An example is presented below. Integrals for peaks A (product **2a**, 1H) and B (reactant **1a**, 2H), corresponding to oxazolidinone hydrogens, are substituted in the equation below. Note that the hydrogens on the oxazolidinone are non-equivalent due to diastereotopicity in **2a**.

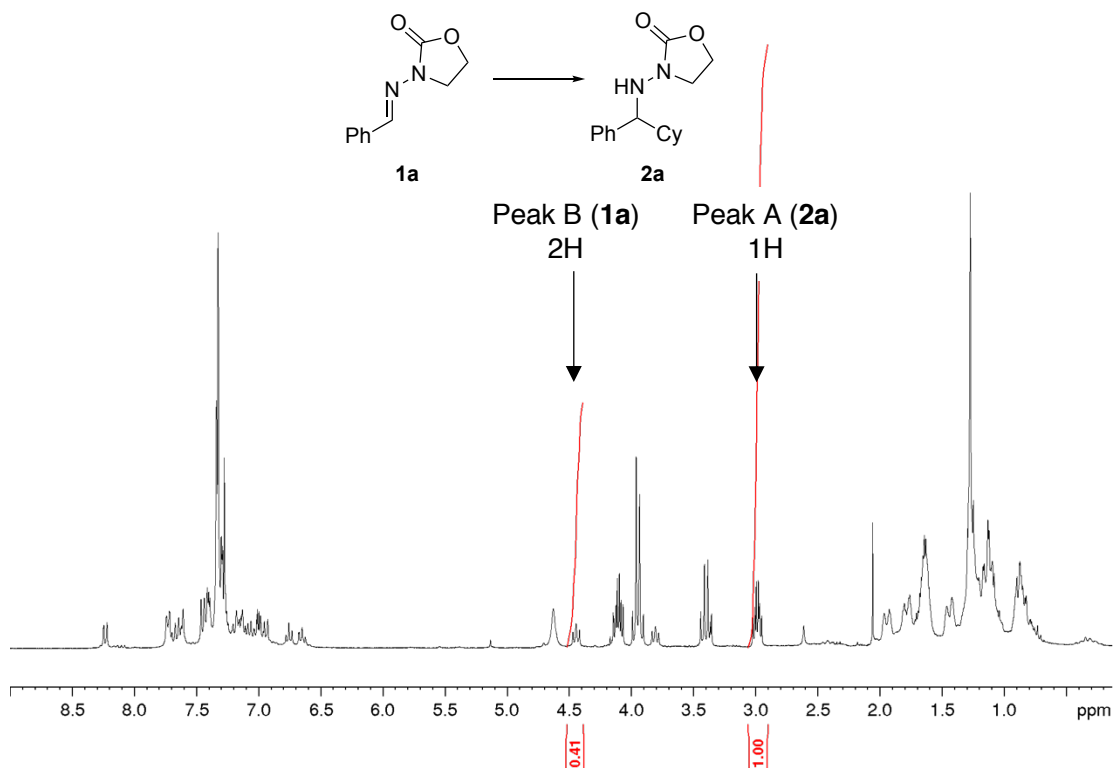

$$\text{estimated \% conversion} = \frac{\text{Int Peak A}}{\text{Int Peak A} + (0.5 * \text{Int Peak B})} * 100$$

## Experimental Details of Radical Addition Reactions

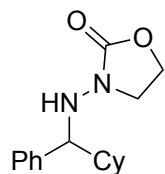

**3-[(Cyclohexylphenylmethyl)amino]-2-oxazolidinone (2a):** Using General Procedure A, from hydrazone **1a** (0.0233 g, 0.123 mmol, 1.00 eq), MgCl<sub>2</sub> (0.0256 g, 0.269 mmol, 2.19 eq), diisopropylammonium bis(catecholato)-

cyclohexylsilicate (0.1670g, 0.389 mmol, 3.16 eq), and 4CzIPN (0.0148 g, 0.0187 mmol, 0.150 eq) was obtained the title compound (0.0203 g, 60% yield) as a colorless solid. mp 91-93°C; HRMS(ESI) *m/z* calcd for C<sub>16</sub>H<sub>22</sub>N<sub>2</sub>O<sub>2</sub>Na 297.1579 ([M+Na]<sup>+</sup>), found 297.1577; <sup>1</sup>H NMR (300 MHz, CDCl<sub>3</sub>) δ 7.37-7.24 (m, 5H), 4.67-4.60 (br s, 1H), 4.10 (td, *J* = 8.8, 4.7 Hz, 1H), 4.03-3.90 (m, apparent q, *J* = 8.8 Hz, 1H), 3.95 (dd, *J* = 7.6, 2.1 Hz, 1H), 3.48-3.35 (m, apparent q, 1H), 3.05-2.95 (td, *J* = 8.2, 4.1 Hz, 1H), 2.01-1.87 (m, 1H), 1.86-1.73 (m, 1H), 1.73-1.54 (m, 3H), 1.51-1.37 (m, 1H), 1.33-1.01 (m, 4H), 0.92-0.76 (m, 1H); <sup>13</sup>C NMR {<sup>1</sup>H} (75 MHz, CDCl<sub>3</sub>) δ 158.8, 140.9, 128.8, 128.1, 127.5, 69.6, 61.4, 47.9, 41.9, 30.2, 29.1, 26.4, 26.2 (2C).

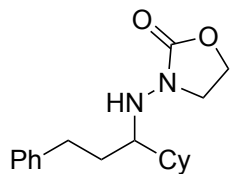

**3-((1-Cyclohexyl-3-phenylpropyl)amino)oxazolidin-2-one (2b):** Using General Procedure A, from hydrazone **1b** (0.0433 g, 0.198 mmol, 1.00 eq), MgCl<sub>2</sub> (0.0417 g, 0.438 mmol, 2.21 eq), diisopropylammonium

bis(catecholato)cyclohexylsilicate (0.2551 g, 0.594 mmol, 3.00 eq), and 4CzIPN (0.0247 g, 0.0313 mmol, 0.158 eq) was obtained the title compound (0.0168 g, 28% yield) as amorphous solid. mp 61-64°C; HRMS(ESI) *m/z* calcd for C<sub>18</sub>H<sub>26</sub>N<sub>2</sub>O<sub>2</sub>Na 325.1892 ([M+Na]<sup>+</sup>), found 325.1900; <sup>1</sup>H NMR (300 MHz, CDCl<sub>3</sub>) δ 7.31-7.25 (m, 2H), 7.23-7.15 (m, 3H), 4.30-4.23 (m, apparent t, *J* = 7.8 Hz, 2H), 4.16 (br d, *J* = 4.1 Hz, 1H), 3.62-3.52 (m, 2H), 2.85-2.76 (m, 1H), 2.75-2.68 (m, apparent t, *J* = 7.8 Hz, 2H), 1.87-1.57 (m, 7H), 1.57-1.44 (m, 1H), 1.30-1.00 (m,

5H);  $^{13}\text{C}$  NMR  $\{^1\text{H}\}$  (75 MHz,  $\text{CDCl}_3$ )  $\delta$  159.3, 142.4, 128.5, 125.9, 63.6, 61.3, 48.4, 39.5, 32.6, 31.0, 29.3, 27.9, 26.8, 26.7 (2C).

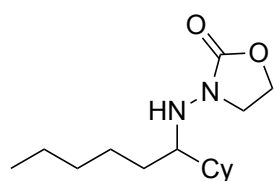

**3-((1-Cyclohexylhexyl)amino)oxazolidin-2-one (2c):** Using General Procedure A, from hydrazone **1c** (0.0428 g, 0.232 mmol, 1.00 eq),  $\text{MgCl}_2$  (0.0474 g, 0.498 mmol, 2.15 eq), diisopropylammonium

bis(catecholato)cyclohexylsilicate (0.2995 g, 0.697 mmol, 3.00 eq), and 4CzIPN (0.0318 g, 0.0403 mmol, 0.174 eq) was obtained the title compound (0.0136 g, 22% yield) as a pale yellow oil. HRMS(ESI)  $m/z$  calcd for  $\text{C}_{15}\text{H}_{28}\text{N}_2\text{O}_2\text{Na}$  291.2048 ( $[\text{M}+\text{Na}]^+$ ), found 291.2051;  $^1\text{H}$  NMR (300 MHz,  $\text{CDCl}_3$ )  $\delta$  4.29 (m, apparent t,  $J = 7.8$  Hz, 2H), 4.11 (br s, 1H), 3.61 (m, apparent t,  $J = 7.8$  Hz, 2H), 2.82-2.74 (m, 1H), 1.81-1.73 (m, 1H), 1.72-1.62 (m, 1H), 1.51-0.97 (m, 17H), 0.88 (t,  $J = 6.9$  Hz, 3H);  $^{13}\text{C}$  NMR  $\{^1\text{H}\}$  (125 MHz,  $\text{CDCl}_3$ )  $\delta$  159.2, 64.2, 61.3, 48.7, 39.6, 32.4, 29.3, 29.1, 28.0, 26.9 (2C), 26.8, 26.1, 22.7, 14.2.

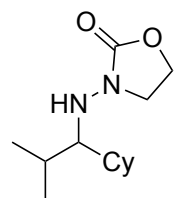

**3-((1-Cyclohexyl-2-methylpropyl)amino)oxazolidin-2-one (2d):** Using General Procedure A, from hydrazone **1d** (0.0347 g, 0.222 mmol, 1.00 eq),  $\text{MgCl}_2$  (0.0450 g, 0.473 mmol, 2.13 eq), diisopropylammonium

bis(catecholato)cyclohexylsilicate (0.2873 g, 0.669 mmol, 3.01 eq), and 4CzIPN (0.0275 g, 0.0348 mmol, 0.157 eq) was obtained the title compound (0.0099 g, 19% yield) as amorphous solid. mp 69-71°C; HRMS(ESI)  $m/z$  calcd for  $\text{C}_{13}\text{H}_{24}\text{N}_2\text{O}_2\text{Na}$  263.1735 ( $[\text{M}+\text{Na}]^+$ ), found 263.1734;  $^1\text{H}$  NMR (300 MHz,  $\text{CDCl}_3$ )  $\delta$  4.27 (m, apparent t,  $J = 7.9$  Hz, 2H), 4.07 (br d,  $J = 4.0$  Hz, 1H), 3.62 (m, apparent t,  $J = 7.9$  Hz, 2H), 2.53 (m, apparent q,  $J = 4.3$  Hz, 1H), 1.93-1.83 (m, 1H), 1.80-1.60 (m, 5H), 1.31-1.06 (m, 6H), 1.00 (d,  $J = 6.9$  Hz, 3H), 0.96 (d,  $J = 6.9$  Hz, 3H);



$^{13}\text{C}$  NMR  $\{^1\text{H}\}$  (75 MHz,  $\text{CDCl}_3$ )  $\delta$  159.0, 69.0, 61.2, 48.2, 39.5, 30.9, 29.4, 28.8, 27.1, 26.9, 26.7, 20.5, 18.8.

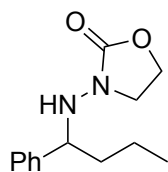

**3-((1-Phenylbutyl)amino)oxazolidin-2-one (3):** Using General Procedure A, from hydrazone **1a** (0.0355 g, 0.187 mmol, 1.00 eq),  $\text{MgCl}_2$  (0.0422 g, 0.443 mmol, 2.37 eq), diisopropylammonium bis(catecholato)propylsilicate (0.2192 g, 0.563 mmol, 3.01 eq), and 4CzIPN (0.0263 g, 0.0333 mmol, 0.178 eq) was obtained the title compound (0.0197 g, 45% yield) as a yellow oil. HRMS(ESI)  $m/z$  calcd for  $\text{C}_{13}\text{H}_{18}\text{N}_2\text{O}_2\text{Na}$  257.1266 ( $[\text{M}+\text{Na}]^+$ ), found 257.1273;  $^1\text{H}$  NMR (300 MHz,  $\text{CDCl}_3$ )  $\delta$  7.43-7.23 (m, 5H), 4.43 (br s, 1H), 4.20-4.12 (m, 2H), 4.00 (m, apparent q,  $J = 8.2$  Hz, 1H), 3.43 (m, apparent q,  $J = 8.8$  Hz, 1H), 3.04 (ddd,  $J = 8.4, 8.4, 5.3$  Hz, 1H), 1.79-1.54 (m, 2H), 1.37-1.08 (m, 2H), 0.88 (t,  $J = 7.2$  Hz, 3H);  $^{13}\text{C}$  NMR  $\{^1\text{H}\}$  (75 MHz,  $\text{CDCl}_3$ )  $\delta$  158.9, 141.9, 128.5, 128.1, 127.8, 64.3, 61.5, 48.1, 37.3, 19.2, 14.2.

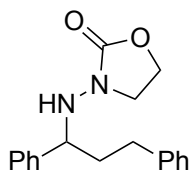

**3-((1,3-Diphenylpropyl)amino)oxazolidin-2-one (4):** Using General Procedure A, from hydrazone **1a** (0.0438 g, 0.230 mmol, 1.00 eq),  $\text{MgCl}_2$  (0.0491 g, 0.516 mmol, 2.24 eq), diisopropylammonium bis(catecholato)(2-phenylethyl)silicate (0.3202 g, 0.709 mmol, 3.08 eq), and 4CzIPN (0.0284 g, 0.0360 mmol, 0.157 eq) was obtained the title compound (0.0144 g, 21% yield) as a yellow oil. HRMS(ESI)  $m/z$  calcd for  $\text{C}_{18}\text{H}_{21}\text{N}_2\text{O}_2$  297.1603 ( $[\text{M}+\text{H}]^+$ ), found 297.1602;  $^1\text{H}$  NMR (300 MHz,  $\text{CDCl}_3$ )  $\delta$  7.42-7.27 (m, 5H), 7.26-7.09 (m, 5H), 4.45 (br s, 1H), 4.25-4.18 (m, 1H), 4.17-4.09 (m, 1H), 4.02 (m, apparent q,  $J = 8.2$  Hz, 1H), 3.43 (m, apparent q,  $J = 8.2$  Hz, 1H), 3.06 (ddd,  $J = 8.4, 8.4, 6.1$  Hz, 1H), 2.61-2.41 (m, 2H), 2.17-1.89 (m, 2H);  $^{13}\text{C}$  NMR  $\{^1\text{H}\}$  (75 MHz,  $\text{CDCl}_3$ )  $\delta$  158.9, 141.7, 141.3, 128.6, 128.5, 128.4, 128.2, 128.0, 126.1, 64.2, 61.5, 48.1, 36.8, 32.2.

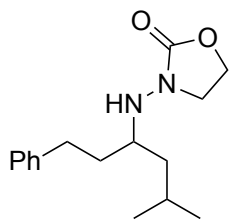

**3-((5-Methyl-1-phenylhexan-3-yl)amino)oxazolidin-2-one (5):** Using

General Procedure A, from hydrazone **1b** (0.0426 g, 0.195 mmol, 1.00 eq),

MgCl<sub>2</sub> (0.0413 g, 0.434 mmol, 2.23 eq), diisopropylammonium

bis(catecholato)isobutylsilicate (0.2370 g, 0.587 mmol, 3.01 eq), and

4CzIPN (0.0247 g, 0.0313 mmol, 0.161 eq) was obtained the title compound (0.0076 g, 14%

yield) as a yellow oil. HRMS(ESI) *m/z* calcd for C<sub>16</sub>H<sub>24</sub>N<sub>2</sub>O<sub>2</sub>Na 299.1735 ([M+Na]<sup>+</sup>), found

299.1727; <sup>1</sup>H NMR (300 MHz, CDCl<sub>3</sub>) δ 7.32-7.26 (m, 2H), 7.23-7.15 (m, 3H), 4.28 (m, apparent

t, *J* = 7.8 Hz, 2H), 4.14 (br s, 1H), 3.60 (m, apparent t, *J* = 7.8 Hz, 2H), 3.13-3.02 (m, 1H), 2.81-

2.59 (m, 2H), 1.84-1.65 (m, 3H), 1.34 (m, apparent t, *J* = 6.8 Hz, 2H), 0.94 (d, *J* = 6.5 Hz, 3H),

0.90 (d, *J* = 6.5 Hz, 3H); <sup>13</sup>C NMR {<sup>1</sup>H} (75 MHz, CDCl<sub>3</sub>) δ 159.5, 142.4, 128.5, 128.5, 126.0,

61.4, 56.9, 48.8, 41.9, 34.8, 31.5, 25.0, 23.1, 22.9.

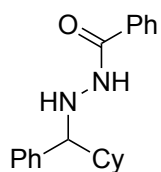

**N'-(Cyclohexyl(phenyl)methyl)benzohydrazide (7a):** Using General Procedure

A, from hydrazone **6a** (0.0295 g, 0.132 mmol, 1.00 eq), MgCl<sub>2</sub> (0.0269 g, 0.282

mmol, 2.15 eq), diisopropylammonium bis(catecholato)cyclohexylsilicate (0.0882

g, 0.205 mmol, 1.55 eq), and 4CzIPN (0.0059 g, 0.00747 mmol, 0.0566 eq) was obtained the

title compound (0.0307 g, 75% yield) as a colorless solid. Product identity was confirmed by

comparison of <sup>1</sup>H NMR to literature reports.<sup>2</sup>

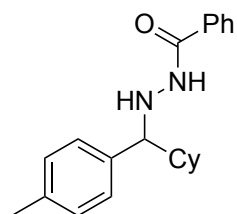

**N'-(Cyclohexyl(p-tolyl)methyl)benzohydrazide (7b):** Using General

Procedure A, from hydrazone **6b** (0.0298 g, 0.125 mmol, 1.00 eq), MgCl<sub>2</sub>

(0.0275 g, 0.289 mmol, 2.31 eq), diisopropylammonium bis(catecholato)-

cyclohexylsilicate (0.1604 g, 0.373 mmol, 2.98 eq), and 4CzIPN (0.0164 g,

0.0208 mmol, 0.166 eq) was obtained the title compound (0.0377 g, 94% yield) as a colorless solid. mp 152-153°C; HRMS(ESI)  $m/z$  calcd for  $C_{21}H_{26}N_2ONa$  345.1943 ( $[M+Na]^+$ ), found 345.1948;  $^1H$  NMR (300 MHz,  $CDCl_3$ )  $\delta$  7.56-7.54 (m, 1H), 7.53-7.51 (m, 1H), 7.49-7.41 (m, 1H), 7.40-7.32 (m, 2H), 7.25-7.18 (m, 3H), 7.17-7.11 (m, 2H), 5.40 (br d,  $J = 7.3$  Hz, 1H), 3.80 (d,  $J = 7.7$  Hz, 1H), 2.35 (s, 3H), 2.09-2.00 (m, 1H), 1.85-1.75 (m, 1H), 1.75-1.55 (m, 2H), 1.51-1.39 (m, 1H), 1.34-1.02 (m, 4H), 0.93-0.72 (m, 2H);  $^{13}C$  NMR  $\{^1H\}$  (75 MHz,  $CDCl_3$ )  $\delta$  166.9, 138.0, 137.1, 133.2, 131.8, 129.1, 128.7, 128.5, 126.9, 70.4, 42.4, 30.2, 29.5, 26.5, 26.3 (2C), 21.3.

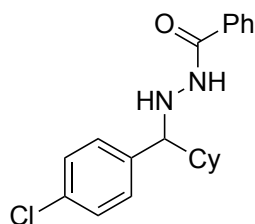

***N'*-((4-Chlorophenyl)(cyclohexyl)methyl)benzohydrazide (7c):** Using

General Procedure A, from hydrazone **6c** (0.0335 g, 0.129 mmol, 1.00 eq),  $MgCl_2$  (0.0268 g, 0.281 mmol, 2.18 eq), diisopropylammonium

bis(catecholato)cyclohexylsilicate (0.1677 g, 0.390 mmol, 3.02 eq), and

4CzIPN (0.0167 g, 0.0211 mmol, 0.164 eq) was obtained the title compound (0.0373 g, 84% yield) as a colorless solid. mp 173-176°C; HRMS(ESI)  $m/z$  calcd for  $C_{20}H_{23}N_2OCINa$  365.1397 ( $[M+Na]^+$ ), found 365.1383;  $^1H$  NMR (300 MHz,  $CDCl_3$ )  $\delta$  7.58-7.55 (m, 1H), 7.54-7.52 (m, 1H), 7.51-7.43 (m, 1H), 7.41-7.36 (m, 2H), 7.35-7.31 (m, 1H), 7.31-7.27 (m, 3H), 7.26-7.22 (m, 1H), 5.40 (br s, 1H), 3.84 (d,  $J = 7.3$  Hz, 1H), 2.06-1.94 (m, 1H), 1.86-1.75 (m, 1H), 1.74-1.56 (m, 2H), 1.51-1.38 (m, 1H), 1.35-1.04 (m, 4H), 0.95-0.76 (m, 2H);  $^{13}C$  NMR  $\{^1H\}$  (75 MHz,  $CDCl_3$ )  $\delta$  167.2, 139.7, 133.1, 132.9, 132.0, 129.9, 128.8, 128.6, 126.9, 70.0, 42.4, 30.1, 29.3, 26.4, 26.2 (2C).

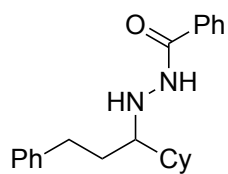

***N'*-(1-Cyclohexyl-3-phenylpropyl)benzohydrazide (7d)**: Using General Procedure A, from hydrazone **6d** (0.0669 g, 0.265 mmol, 1.00 eq), MgCl<sub>2</sub> (0.0520 g, 0.546 mmol, 2.06 eq), diisopropylammonium

bis(catecholato)cyclohexylsilicate (0.1789 g, 0.416 mmol, 1.57 eq), and 4CzIPN (0.0128 g, 0.0162 mmol, 0.0611 eq) was obtained the title compound (0.0564 g, 63% yield) as a colorless solid. mp 111-114°C; HRMS(ESI) *m/z* calcd for C<sub>22</sub>H<sub>29</sub>N<sub>2</sub>O 337.2280 ([M+H]<sup>+</sup>), found 337.2281; <sup>1</sup>H NMR (300 MHz, CDCl<sub>3</sub>) δ 7.75-7.70 (m, 2H), 7.56-7.49 (m, 1H), 7.49-7.40 (m, 1H), 7.32-7.32 (m, 2H), 7.25-7.14 (m, 3H), 5.02 (br s, 1H), 2.92-2.68 (m, 3H), 1.91-1.62 (m, 7H) 1.62-1.47 (m, 1H) 1.35-1.04 (m, 5H); <sup>13</sup>C NMR {<sup>1</sup>H} (75 MHz, CDCl<sub>3</sub>) δ 167.3, 142.7, 133.1, 131.9, 128.9, 128.5 (2C), 126.9, 125.9, 65.3, 40.2, 32.9, 31.6, 29.3, 28.8, 26.8 (3C). **Gram-scale reaction:** Using the same procedure, from hydrazone **6d** (1.0062 g, 3.99 mmol, 1.00 eq), MgCl<sub>2</sub> (0.8235 g, 8.65 mmol, 2.17 eq), diisopropylammonium bis(catecholato)cyclohexylsilicate (2.5945 g, 6.04 mmol, 1.51 eq), and 4CzIPN (0.1822 g, 0.231 mmol, 0.0579 eq) in 40 mL of DMSO was obtained **7d** (0.8005 g, 60% yield) as a colorless solid.

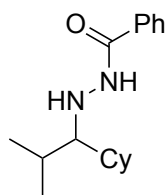

***N'*-(1-Cyclohexyl-2-methylpropyl)benzohydrazide (7e)**: Using General Procedure A, from hydrazone **6e** 0.0399 g (0.210 mmol, 1.00 eq), MgCl<sub>2</sub> (0.0462 g, 0.485 mmol, 2.31 eq), diisopropylammonium bis(catecholato)cyclohexylsilicate

(0.1394 g, 0.324 mmol, 1.55 eq), and 4CzIPN (0.0114 g, 0.0144 mmol, 0.0687 eq) was obtained the title compound (0.0146 g, 25% yield) as a yellow oil. HRMS(ESI) *m/z* calcd for C<sub>17</sub>H<sub>27</sub>N<sub>2</sub>O 275.2123 ([M+H]<sup>+</sup>), found 275.2122; <sup>1</sup>H NMR (300 MHz, CDCl<sub>3</sub>) δ 7.78-7.74 (m, 2H), 7.61-7.54 (m, 1H), 7.53-7.41 (m, 3H), 4.70 (br s, 1H), 2.51 (dd, *J* = 4.9, 4.9 Hz, 1H), 2.04-1.86 (m, 2H), 1.85-1.49 (m, 4H), 1.37-1.12 (m, 6H), 1.07 (d, *J* = 6.9 Hz, 3H), 1.04 (d, *J* = 6.9 Hz, 3H); <sup>13</sup>C

NMR {<sup>1</sup>H} (75 MHz, CDCl<sub>3</sub>) δ 166.6, 133.3, 131.9, 128.9, 126.9, 71.5, 39.9, 31.6, 29.4, 29.1, 27.0, 26.8, 26.7, 21.3, 18.7.

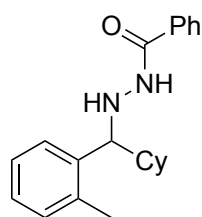

**N'-(Cyclohexyl(o-tolyl)methyl)benzohydrazide (7f):** Using General Procedure A, from hydrazone **6f** (0.0574 g, 0.241 mmol, 1.00 eq), MgCl<sub>2</sub> (0.475 g, 0.499 mmol, 2.07 eq), diisopropylammonium bis(catecholato)cyclohexylsilicate (0.3197 g, 0.744 mmol, 3.09 eq), and

4CzIPN (0.320 g, 0.0405 mmol, 0.168 eq) was obtained the title compound (0.0727 g, 94% yield) as an amorphous solid. mp 130-132 °C; HRMS(ESI) *m/z* calcd for C<sub>21</sub>H<sub>26</sub>N<sub>2</sub>ONa 345.1943 ([M+Na]<sup>+</sup>), found 345.1938; <sup>1</sup>H NMR (300 MHz, CDCl<sub>3</sub>) δ 7.55-7.42 (m, 4H), 7.39-7.32 (m, 2H), 7.28-7.21 (m, 2H), 7.20-7.10 (m, 2H), 4.23 (d, *J* = 8.1 Hz, 1H), 2.26 (s, 3H), 2.19-2.08 (m, 1H), 1.87-1.79 (m, 1H), 1.75-1.59 (m, 3H), 1.40-1.00 (4H), 0.99-0.81 (m, 2H); <sup>13</sup>C NMR {<sup>1</sup>H} (75 MHz, CDCl<sub>3</sub>) δ 167.1, 139.7, 137.4, 133.0, 131.7, 130.3, 128.6, 126.8, 126.7, 126.2, 29.8, 29.5, 26.4, 26.3, 26.1, 19.9.

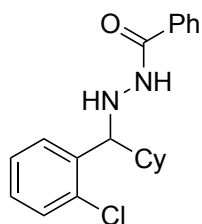

**N'-(2-Chlorophenyl)(cyclohexyl)methyl)benzohydrazide (7g):** Using General Procedure A, from hydrazone **6g** (0.0443 g, 0.171 mmol, 1.00 eq), MgCl<sub>2</sub> (0.0395g, 0.415 mmol, 2.46 eq), diisopropylammonium bis(catecholato)cyclohexylsilicate (0.2319 g, 0.540 mmol, 3.16 eq), and

4CzIPN (0.0247 g, 0.313 mmol, 0.183 eq) was obtained the title compound (0.0494 g, 84% yield) as amorphous solid. mp 128-129°C; HRMS(ESI) *m/z* calcd for C<sub>20</sub>H<sub>24</sub>N<sub>2</sub>OCl 343.1577 ([M+H]<sup>+</sup>), found 343.1576; <sup>1</sup>H NMR (300 MHz, CDCl<sub>3</sub>) δ 7.65-7.59 (m, 1H), 7.58-7.53 (m, 2H), 7.50-7.42 (m, 1H), 7.40-7.28 (m, 4H), 7.24-7.15 (m, 2H), 5.49 (br s, 1H), 4.50 (d, *J* = 7.4 Hz, 1H), 2.13-2.03 (m, 1H), 1.88-1.53 (m, 4H), 1.49-1.05 (m, 6H); <sup>13</sup>C NMR {<sup>1</sup>H} (75 MHz, CDCl<sub>3</sub>) δ

167.1, 139.0, 135.2, 133.0, 131.7, 129.5, 129.0, 128.6, 128.2, 126.9, 126.8, 65.7, 42.2, 29.4 (2C), 26.3, 26.2, 26.1.

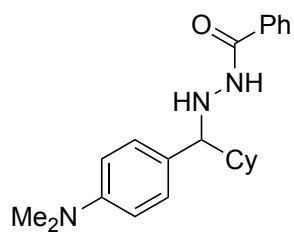

**N'-(Cyclohexyl(4-(dimethylamino)phenyl)methyl)benzohydrazide**

**(7h)**: Using General Procedure A, from hydrazone **6h** (0.0464 g, 0.174 mmol, 1.00 eq), MgCl<sub>2</sub> (0.0360 g, 0.378 mmol, 2.17 eq), diisopropylammonium bis(catecholato)cyclohexylsilicate (0.2318 g, 0.540 mmol, 3.10 eq), and 4CzIPN (0.0224 g, 0.284 mmol, 0.163 eq) was obtained the title compound (0.0195 g, 32% yield) as a yellow solid. mp 123-125°C; HRMS(ESI) *m/z* calcd for C<sub>22</sub>H<sub>30</sub>N<sub>3</sub>O 352.2389 ([M+H]<sup>+</sup>), found 352.2397; <sup>1</sup>H NMR (300 MHz, CDCl<sub>3</sub>) δ 7.58-7.52 (m, 2H), 7.49-7.41 (m, 1H), 7.39-7.31 (m, 2H), 7.25-7.14 (m, 3H), 6.75-6.68 (m, 2H), 5.43 (br s, 1H), 3.72 (d, *J* = 7.7 Hz, 1H), 2.96 (s, 6H), 2.09-1.99 (m, 1H), 1.85-1.75 (m, 1H), 1.70-1.40 (m, 4H), 1.35-0.79 (m, 5H); <sup>13</sup>C NMR {<sup>1</sup>H} (75 MHz, CDCl<sub>3</sub>) δ 166.7, 150.0, 133.3, 131.7, 129.3, 128.7 (2C), 126.9, 112.4, 70.1, 42.5, 40.8, 30.3, 29.5, 26.5, 26.3 (2C).

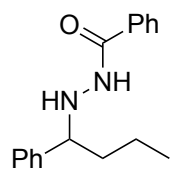

**N'-(1-Phenylbutyl)benzohydrazide (8)**: Using General Procedure A, from

hydrazone **6a** (0.0287 g, 0.128 mmol, 1.00 eq), MgCl<sub>2</sub> (0.0283 g, 0.297 mmol, 2.32 eq), diisopropylammonium bis(catecholato)propylsilicate (0.1543 g, 0.396 mmol, 3.09 eq), and 4CzIPN (0.0179 g, 0.0227 mmol, 0.177 eq) was obtained the title compound (0.0231 g, 67% yield) as a yellow oil. HRMS(ESI) *m/z* calcd for C<sub>17</sub>H<sub>20</sub>N<sub>2</sub>O 291.1473 ([M+Na]<sup>+</sup>), found 291.1472; <sup>1</sup>H NMR (300 MHz, CDCl<sub>3</sub>) δ 7.61-7.56 (m, 2H), 7.51-7.44 (m, 1H), 7.42-7.39 (m, 2H), 7.38-7.34 (m, 5H), 7.33-7.26 (m, 1H), 5.20 (br s, 1H), 4.07 (dd, *J* = 8.2, 5.8 Hz, 1H), 1.89-1.59 (m, 2H) 1.44-1.14 (m, 2H), 0.91 (t, *J* = 7.3 Hz, 3H); <sup>13</sup>C NMR {<sup>1</sup>H} (75 MHz, CDCl<sub>3</sub>) δ 167.3, 142.2, 133.0, 131.9, 128.8, 128.7, 128.0, 127.7, 126.9, 65.3, 37.6, 19.4, 14.2.

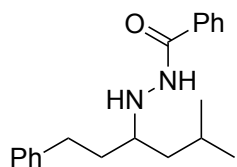

***N'*-(5-Methyl-1-phenylhexan-3-yl)benzohydrazide (9):** Using General Procedure A, from hydrazone **6b** (0.0517 g, 0.205 mmol, 1.00 eq), MgCl<sub>2</sub> (0.0433 g, 0.455 mmol, 2.22 eq), diisopropylammonium

bis(catecholato)isobutylsilicate (0.1403 g, 0.348 mmol, 1.70 eq), and 4CzIPN (0.0101 g, 0.0128 mmol, 0.0624 eq) was obtained the title compound (0.0296 g, 47% yield) as a yellow oil.

HRMS(ESI) *m/z* calcd for C<sub>20</sub>H<sub>27</sub>N<sub>2</sub>O 311.2123 ([M+H]<sup>+</sup>), found 311.2121; <sup>1</sup>H NMR (300 MHz, CDCl<sub>3</sub>) δ 7.74-7.69 (m, 2H), 7.56-7.40 (m, 4H), 7.32-7.25 (m, 2H), 7.25-7.14 (m, 3H), 4.98 (br s, 1H), 3.09-3.02 (m, 1H), 2.84-2.66 (m, 2H), 1.90-1.71 (m, 3H), 1.49-1.29 (m, 2H), 0.97 (d, *J* = 6.5 Hz, 3H), 0.92 (d, *J* = 6.6 Hz, 3H); <sup>13</sup>C NMR {<sup>1</sup>H} (75 MHz, CDCl<sub>3</sub>) δ 167.5, 142.6, 133.1, 132.0, 128.9, 128.5 (2C), 126.9, 125.9, 58.2, 42.3, 35.0, 31.9, 25.2, 23.3, 22.9.

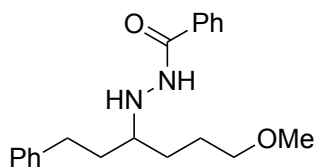

***N'*-(6-Methoxy-1-phenylhexan-3-yl)benzohydrazide (10):** Using General Procedure A, from hydrazone **6b** (0.0640 g, 0.254 mmol, 1.00 eq), MgCl<sub>2</sub> (0.0525 g, 0.551 mmol, 2.17 eq), diisopropyl-

ammonium bis(catecholato)(3-methoxypropyl)silicate (0.1661 g, 0.396 mmol, 1.56 eq), and 4CzIPN (0.0123 g, 0.0156 mmol, 0.0614 eq) was obtained the title compound (0.0508 g, 61% yield) as a colorless oil. HRMS(ESI) *m/z* calcd for C<sub>20</sub>H<sub>27</sub>N<sub>2</sub>O<sub>2</sub> 327.2073 ([M+H]<sup>+</sup>), found 327.2073; <sup>1</sup>H NMR (300 MHz, CDCl<sub>3</sub>) δ 7.77-7.70 (m, 3H), 7.56-7.40 (m, 3H), 7.32-7.15 (m, 5H), 5.02 (br s, 1H), 3.48-3.40 (m, 2H), 3.34 (s, 3H), 3.07-2.98 (m, 1H), 2.76 (m, apparent t, *J* = 8.0 Hz, 2H), 1.89-1.52 (m, 6H); <sup>13</sup>C NMR {<sup>1</sup>H} (75 MHz, CDCl<sub>3</sub>) δ 167.2, 142.4, 133.1, 131.9, 128.8, 128.5 (2C), 127.0, 126.0, 73.0, 59.7, 58.8, 34.4, 32.1, 28.7, 25.3.

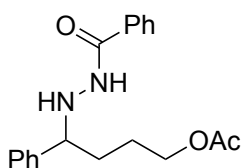

**4-(2-Benzoylhydrazinyl)-4-phenylbutyl acetate (11):** Using General Procedure A, from hydrazone **6a** (0.0589 g, 0.263 mmol, 1.00 eq), MgCl<sub>2</sub>

(0.570 g, 0.599 mmol, 2.28 eq), diisopropylammonium bis(catecholato)(3-acetoxypropyl)silicate (0.1900 g, 0.424 mmol, 1.61 eq), and 4CzIPN (0.0123 g, 0.0156 mmol, 0.0593 eq) was obtained the title compound (0.0638 g, 74% yield) as an amorphous solid. mp 94-97°C; HRMS(ESI)  $m/z$  calcd for  $C_{19}H_{22}N_2O_3Na$  349.1528 ( $[M+Na]^+$ ), found 349.1525;  $^1H$  NMR (300 MHz,  $CDCl_3$ )  $\delta$  7.62-7.57 (m, 2H), 7.51-7.44 (m, 2H), 7.41 -7.26 (m, 7H), 5.16 (br s, 1H), 4.09 (dd,  $J = 8.2, 6.7$  Hz, 1H), 4.02 (m, apparent t,  $J = 6.4$  Hz, 2H), 2.01 (s, 3H), 1.98-1.85 (m, 1H), 1.82-1.43 (m, 3H);  $^{13}C$  NMR  $\{^1H\}$  (75 MHz,  $CDCl_3$ )  $\delta$  171.2, 167.3, 141.3, 132.8, 131.9, 128.7 (3C), 127.9, 126.8, 64.9, 64.2, 31.5, 25.1, 21.0.

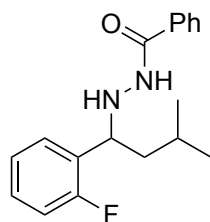

***N'*-(1-(2-Fluorophenyl)-3-methylbutyl)benzohydrazide (12):** Using General

Procedure A, from 2-fluorobenzaldehyde *N*-benzoylhydrazone (0.0506 g, 0.209 mmol, 1.00 eq),  $MgCl_2$  (0.0424 g, 0.445 mmol, 2.13 eq),

diisopropylammonium bis(catecholato)isobutylsilicate (0.1436 g, 0.356 mmol,

1.70 eq), and 4CzIPN (0.0099 g, 0.0125 mmol, 0.0598 eq) was obtained the title compound

(0.0485 g, 77% yield) as a yellow oil. mp 67-70°C; HRMS(ESI)  $m/z$  calcd for  $C_{18}H_{22}N_2OF$

301.1716 ( $[M+H]^+$ ), found 301.1720;  $^1H$  NMR (300 MHz,  $CDCl_3$ )  $\delta$  7.63-7.55 (m, 2H), 7.55-7.44 (m, 3H), 7.42-7.33 (m, 3H), 7.29-7.13 (m, 2H), 7.07-6.99 (m, 1H), 5.23 (br s, 1H), 4.55 (m,

apparent t,  $J = 7.3$  Hz, 1H), 1.76-1.58 (m, 3H), 0.97 (d,  $J = 6.3$  Hz, 3H), 0.95 (d,  $J = 6.3$  Hz, 6H);

$^{13}C$  NMR  $\{^1H\}$  (75 MHz,  $CDCl_3$ )  $\delta$  167.4, 160.0, 133.1, 131.9, 128.9, 128.8 (2C), 127.0 (2C),

124.5, 115.8 (d,  $J_{CF} = 22.8$  Hz), 56.7, 43.6, 25.3, 23.1, 22.8.

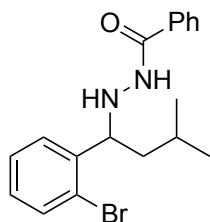

***N'*-(1-(2-Bromophenyl)-3-methylbutyl)benzohydrazide (13):** Using General

Procedure A, from 2-bromobenzaldehyde *N*-benzoylhydrazone (0.0828 g,

0.273 mmol, 1.00 eq),  $MgCl_2$  (0.0576 g, 0.605 mmol, 2.22 eq),



diisopropylammonium bis(catecholato)isobutylsilicate (0.1728 g, 0.428 mmol, 1.57 eq), and 4CzIPN (0.0151 g, 0.0191 mmol, 0.07 eq) was obtained the title compound (0.0800 g, 81% yield) as an amorphous solid. mp 106-107°C; HRMS(ESI)  $m/z$  calcd for  $C_{18}H_{22}N_2O^{\delta 1}Br$  363.08941( $[M+H]^+$ ), found 363.0894;  $^1H$  NMR (300 MHz,  $CDCl_3$ )  $\delta$  7.65-7.57 (m, 3H), 7.56-7.51 (m, 1H), 7.50-7.43 (m, 1H), 7.40-7.31 (m, 4H), 7.15-7.09 (m, 1H), 5.28 (br s, 1H), 4.73 (t,  $J = 7.0$  Hz, 1H), 1.81-1.51 (m, 3H), 1.04 (d,  $J = 6.4$  Hz, 3H), 0.97 (d,  $J = 6.5$  Hz, 3H);  $^{13}C$  NMR { $^1H$ } (75 MHz,  $CDCl_3$ )  $\delta$  167.4, 141.8, 133.0, 131.8, 128.9, 128.7 (2C), 127.9, 127.0 (2C), 125.1, 61.7, 44.2, 25.4, 23.4, 22.6.

### Reductive Cleavage of N-N Bond

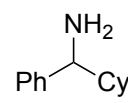 **Cyclohexyl(phenyl)methanamine (14)**: To a solution of **7a** (0.0895 g, 0.290 mmol, 1.00 eq) in 1:1 THF:MeOH (1 mL) under Ar was added a solution of  $Sml_2$  in THF dropwise via syringe until the reaction mixture sustained a blue color. At this time, opening the reaction to air caused the mixture to quickly turn yellow, and it was promptly filtered through a pad of Celite using EtOAc. Concentration and gradient flash chromatography (hexanes and EtOAc, with 1%  $Et_3N$  to buffer silica) furnished the title compound (0.0363 g, 66% yield) as an orange oil. Product identity was confirmed by comparison of  $^1H$  NMR to literature reports.<sup>5</sup>

## Formal Synthesis of Racemic Repaglinide

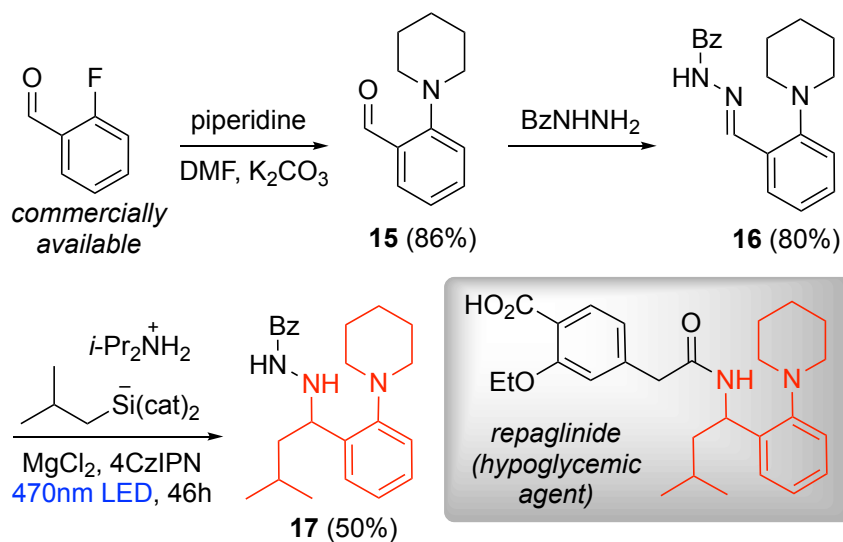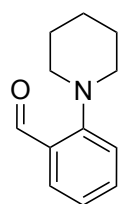

**2-(Piperidin-1-yl)benzaldehyde (15):** To a mixture of  $K_2CO_3$  (2.7298 g, 19.8 mmol, 2.08 eq) and 2-fluorobenzaldehyde (1.00 mL, 9.51 mmol, 1.00 eq) in DMF (10 mL) was added piperidine (0.95 mL, 9.62 mmol, 1.01 eq). The reaction mixture was heated at reflux for 20.5 h, and then cooled to room temperature. Filtration, rinsing the solid fraction with EtOAc, and concentration afforded an orange oil. Gradient flash chromatography (50:1 hexanes:EtOAc to 10:1) furnished the title compound (1.5462 g, 86% yield) as a viscous yellow oil. Product identity was confirmed by comparison of  $^1H$  NMR to literature reports.<sup>6</sup>

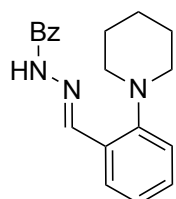

**N'-(2-(Piperidin-1-yl)benzylidene)benzohydrazide (16):** A mixture of **15** (0.3488 g, 1.84 mmol, 1.07 eq), benzoic hydrazide (0.2345 g, 1.72 mmol, 1.00 eq) and EtOH (5 mL) was irradiated in sealed tube in a microwave reactor (limits set at 160 °C, 300W) for 15 min. After concentration, the solid was washed with  $Et_2O$  and stored in vacuo, removing residual solvent, to furnish the title compound (0.4219 g, 80% yield) as a yellow solid. mp 231-233°C (decomp.); HRMS(ESI)  $m/z$  calcd for  $C_{19}H_{22}N_3O$  308.1763 ( $[M+H]^+$ ),

found 308.1762;  $^1\text{H}$  NMR (300 MHz, DMSO)  $\delta$  11.87 (s, 1H), 8.71 (s, 1H), 7.96-7.81 (m, 3H), 7.64-7.47 (m, 3H), 7.42-7.32 (m, 1H), 7.16-7.06 (m, 2H), 2.90-2.79 (m, 4H), 1.77-1.66 (m, 4H), 1.60-1.48 (m, 2H);  $^{13}\text{C}$  NMR  $\{\text{H}\}$   $\delta$  163.3, 153.5, 145.6, 133.7, 131.6, 131.4, 130.7, 128.4, 127.7, 126.3, 122.8, 119.3, 54.3, 53.0, 25.8, 25.0, 23.6.

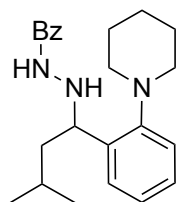

***N'*-(3-methyl-1-(2-(piperidin-1-yl)phenyl)butyl)benzohydrazide (17): A**

mixture of **16** (0.0537 g, 0.175 mmol, 1.00 eq) and  $\text{MgCl}_2$  (0.0491 g, 0.516 mmol, 2.95 eq) in DMSO (2.7 mL) was stirred under Ar. After 1 h, diisopropylammonium bis(catecholato)isobutylsilicate (0.960 g, 0.238 mmol, 1.36 eq) and 4CzIPN (0.0233 g, 0.0295 mmol, 0.169 eq) were added. The reaction mixture was irradiated with 470 nm LED light under Ar at ca. 30 °C. At 6 h and 15 h, additional portions of silicate (0.0641 g, 0.0571 g, and 0.0516 g) were added as solutions in DMSO (0.2 mL) and radiation was resumed. A total of 3.80 equivalents of silicate were added in 4 portions. After 44 h of irradiation, workup and purification as in General Procedure A furnished the title compound (0.0321 g, 50% yield) as a yellow oil. HRMS(ESI)  $m/z$  calcd for  $\text{C}_{23}\text{H}_{32}\text{N}_3\text{O}$  366.2545 ( $[\text{M}+\text{H}]^+$ ), found 366.2546;  $^1\text{H}$  NMR (300 MHz,  $\text{CDCl}_3$ )  $\delta$  7.61-7.51 (m, 3H), 7.49-7.32 (m, 4H), 7.24-7.20 (m, 1H), 7.17-7.08 (m, 2H), 5.26 (br s, 1H), 4.87 (t,  $J = 7.2$  Hz, 1H), 2.97-2.62 (m, 4H), 1.78-1.36 (m, 9H), 1.01 (t,  $J = 6.4$  Hz, 1H), 0.99 (t,  $J = 6.1$  Hz, 1H);  $^{13}\text{C}$  NMR  $\{\text{H}\}$  (75 MHz,  $\text{CDCl}_3$ )  $\delta$  167.1, 154.0, 138.6, 133.3, 131.7, 128.7, 127.9, 127.7, 126.8, 124.4, 120.8, 56.2, 55.0, 45.1, 26.6 (2C), 25.3, 24.3, 23.5, 22.8.

# Spectral Data for New Compounds

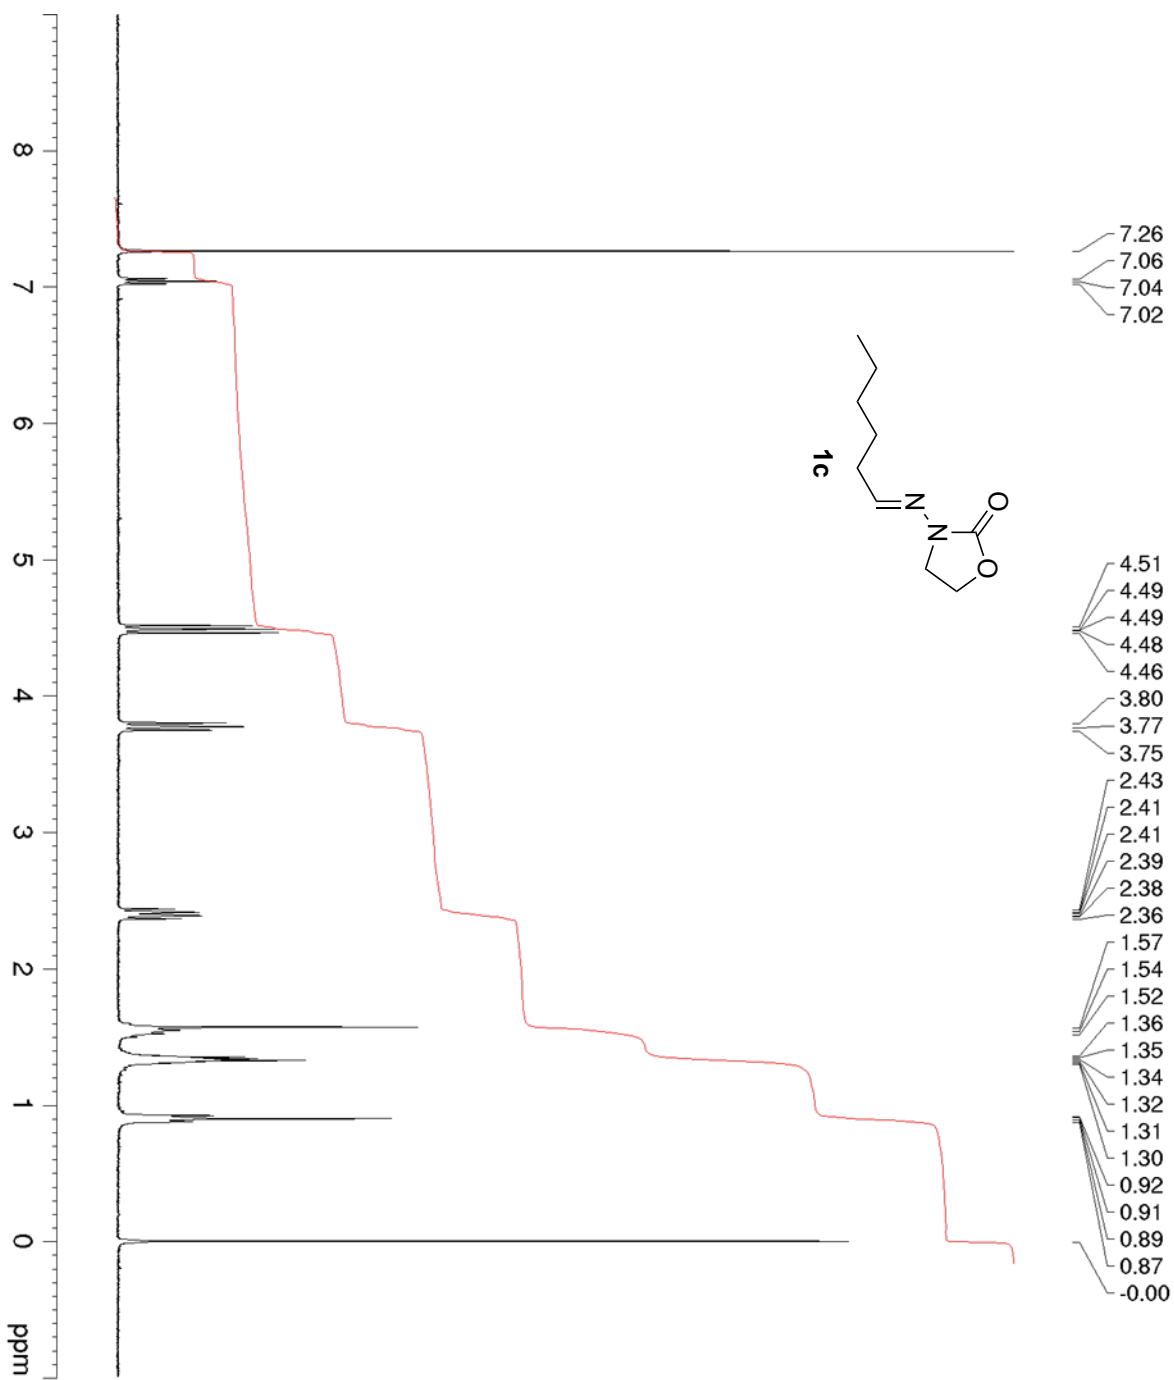

Current Data Parameters  
 NAME SC-02-236 f1xms 16-33  
 EXPNO 1  
 PROCNO 1

F2 - Acquisition Parameters  
 Date\_ 20180611  
 Time 14:56  
 INSTRUM FURIER300  
 PROBHD 5 mm DUL 13C-1  
 PULPROG zg30  
 TD 65536  
 SOLVENT CDC13  
 NS 8  
 DS 2  
 SWH 6103.516 Hz  
 FIDRES 0.093132 Hz  
 AQ 5.3687091 sec  
 RG 131.952  
 DW 81.920 usec  
 DE 6.50 usec  
 TE 294.6 K  
 D1 1.00000000 sec  
 TDO 1

===== CHANNEL f1 =====  
 SFO1 300.1818537 MHz  
 NUC1 1H  
 P1 15.00 usec  
 PLW1 13.80399990 W

F2 - Processing parameters  
 SI 65536  
 SF 300.1800050 MHz  
 WDW EM  
 SSB 0  
 LB 0.30 Hz  
 GB 0  
 PC 1.00

154.8  
149.0  
61.4  
42.4  
32.8  
31.5  
26.7  
22.5  
14.1

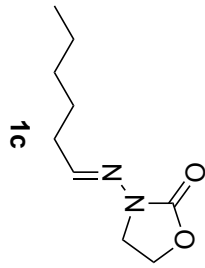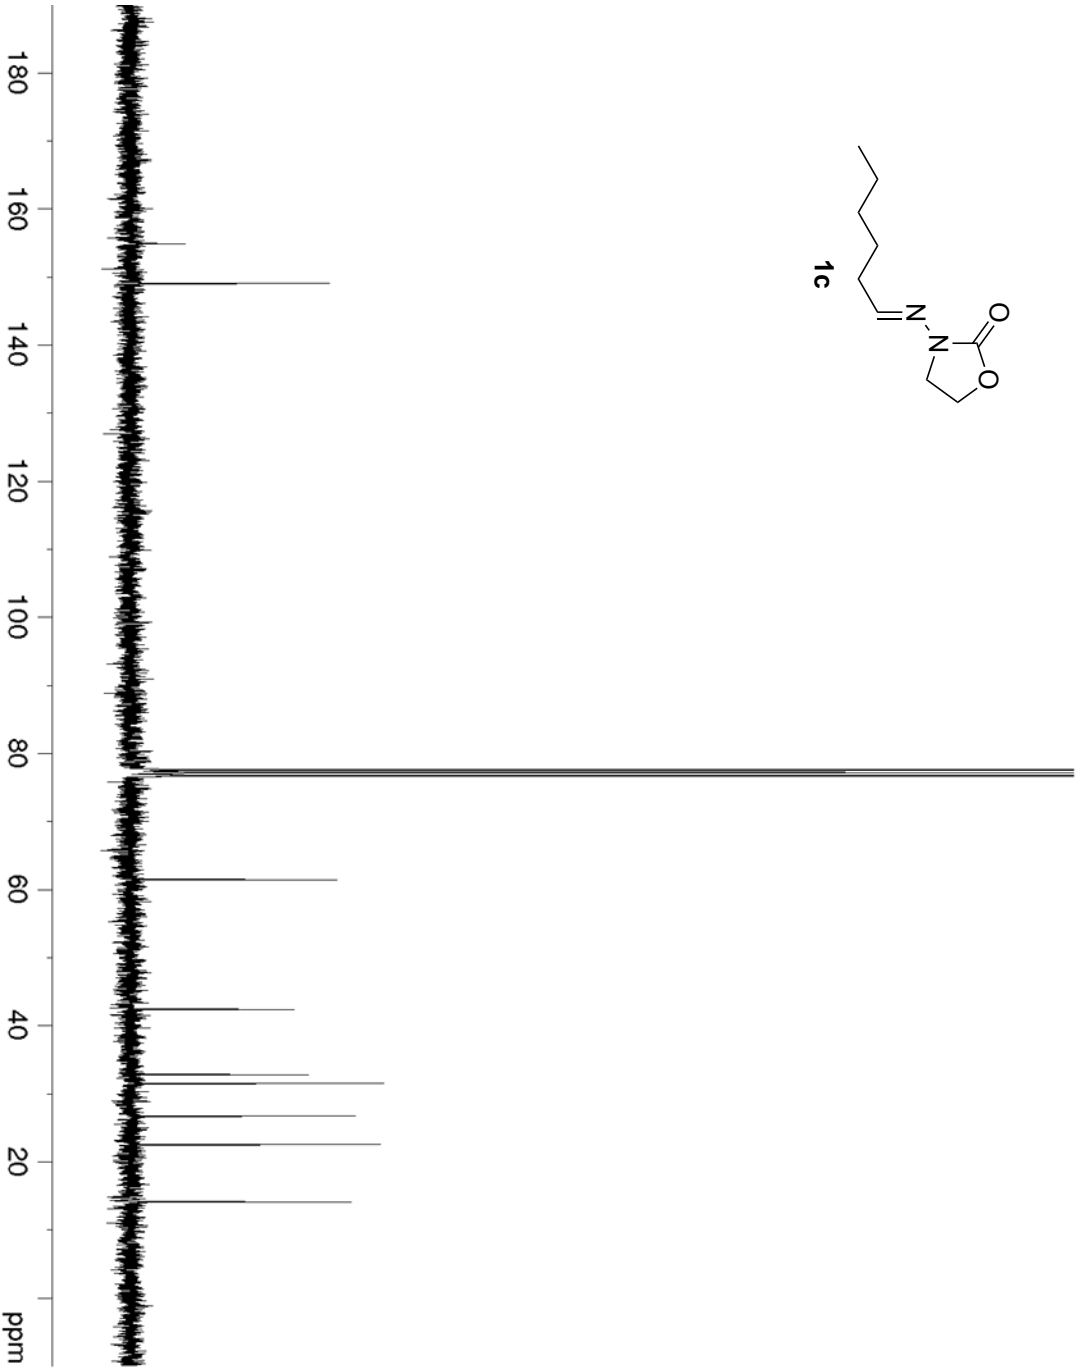

Current Data Parameters  
NAME SC-03-148 13C  
EXPNO 1  
PROCNO 1

F2 - Acquisition Parameters  
Date\_ 20190605

Time 11.23  
INSTRUM FOUERIER300  
PROBHD 5 mm DUL 13C-1  
PULPROG zgpg30  
TD 65536  
SOLVENT CDC13  
NS 500  
DS 4  
SWH 24414.063 Hz  
FIDRES 0.372529 Hz  
AQ 1.3421773 sec  
RG 501.187  
DW 20.480 usec  
DE 6.50 usec  
TE 294.5 K  
D1 2.00000000 sec  
D11 0.03000000 sec  
D31 0.00001500 sec  
D40 0.030008300 sec  
L4 40  
L5 57  
P32 90.00 usec  
TD0 1

===== CHANNEL f1 =====  
SFO1 75.4878687 MHz  
NUC1 13C  
P1 15.00 usec  
PLW1 22.00000000 W

===== CHANNEL f2 =====  
SFO2 300.1812007 MHz  
NUC2 1H  
CPDPRG12 waltz16  
PCPD2 90.00 usec  
PLW2 13.80399990 W  
PLW12 0.38343999 W  
PLW13 0.31059000 W

F2 - Processing parameters  
SI 32768  
SF 75.4803128 MHz  
WDW EM  
SSB 0  
LB 1.00 Hz  
GB 0  
PC 1.40

7.26  
6.91  
6.89

4.51  
4.48  
4.48  
4.45  
3.79  
3.76  
3.74

2.73  
2.71  
2.69  
2.66

1.14  
1.12

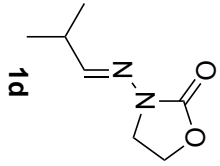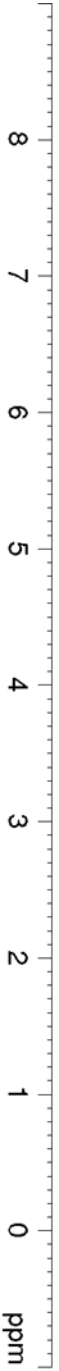

Current Data Parameters  
NAME SC-02-268 1H washed  
EXPNO 10  
PROCNO 1

F2 - Acquisition Parameters  
Date\_ 20190612  
Time 13:32

INSTRUM FOUJIER300  
PROBHD 5 mm DUL 13C-1  
PULPROG zg30

TD 65536  
SOLVENT CDC13  
NS 8

DS 0  
SWH 6103.516 Hz  
FIDRES 0.093132 Hz

RG 103.888  
AQ 5.3687091 sec  
DW 81.920 usec  
DE 6.50 usec  
TE 294.5 K  
D1 1.00000000 sec  
TD0 1

===== CHANNEL f1 =====  
SFO1 300.1818537 MHz  
NUC1 1H  
P1 15.00 usec  
PLW1 13.80399990 W

F2 - Processing parameters  
SI 65536  
SF 300.1800050 MHz  
WDW EM  
SSB 0  
LB 0.30 Hz  
GB 0  
PC 1.00

154.7  
153.5

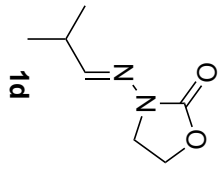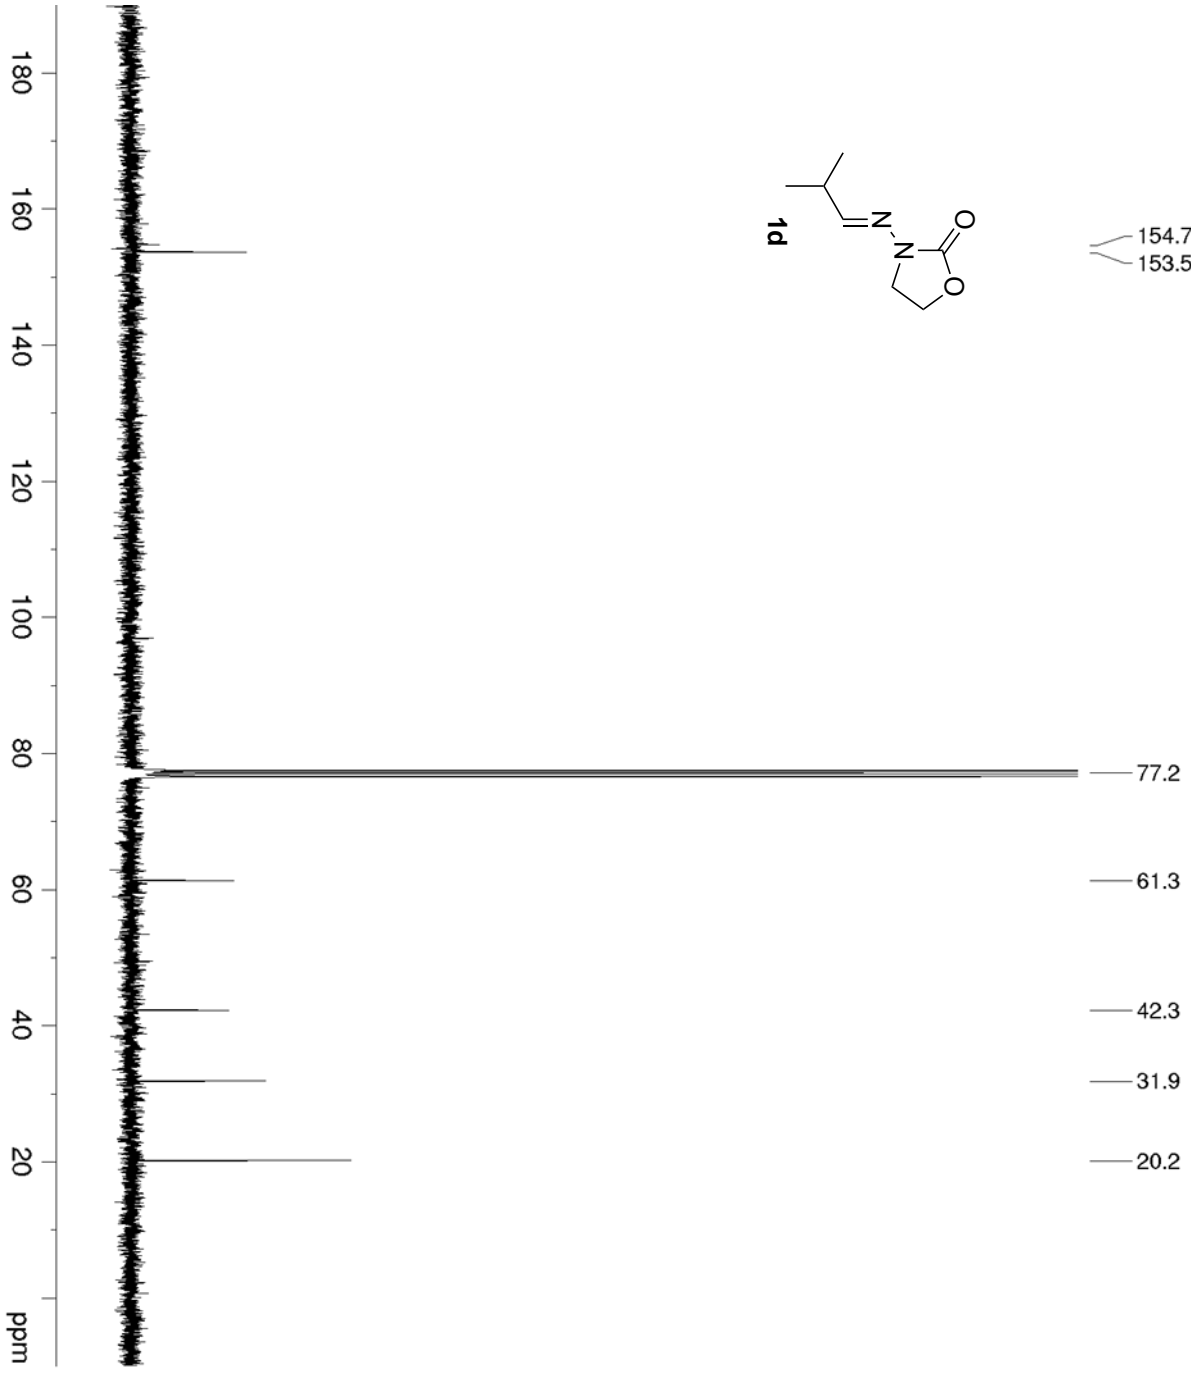

Current Data Parameters  
 NAME SC-02-268 13C  
 EXPNO 10  
 PROCNO 1

F2 - Acquisition Parameters  
 Date\_ 20190615  
 Time 12.39

INSTRUM FURIER300  
 PROBHD 5 mm DUL 13C-1  
 PULPROG zgpg30  
 TD 65536  
 SOLVENT CDC13  
 NS 857  
 DS 4

SWH 24414.063 Hz  
 FIDRES 0.372529 Hz  
 AQC 1.3421773 sec  
 RG 501.187  
 DW 20.480 usec  
 DE 6.50 usec  
 TE 294.3 K

D1 2.00000000 sec  
 D11 0.03000000 sec  
 D31 0.00001500 sec  
 D40 0.030008300 sec  
 L4 40  
 L5 57  
 P32 90.00 usec  
 TD0 1

===== CHANNEL f1 =====  
 SFO1 75.4878687 MHz  
 NUC1 13C  
 P1 15.00 usec  
 PLW1 22.00000000 W

===== CHANNEL f2 =====  
 SFO2 300.1812007 MHz  
 NUC2 1H  
 CPDPRG2 waltz16  
 PCPD2 90.00 usec  
 PLW2 13.80399990 W  
 PLW12 0.38343999 W  
 PLW13 0.31059000 W

F2 - Processing parameters  
 SI 32768  
 SF 75.4803210 MHz  
 WDW EM  
 SSB 0  
 LB 1.00 Hz  
 GB 0  
 PC 1.40

6.97  
 4.49  
 4.47  
 4.47  
 4.46  
 4.44  
 3.79  
 3.76  
 3.74

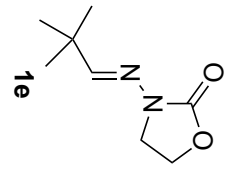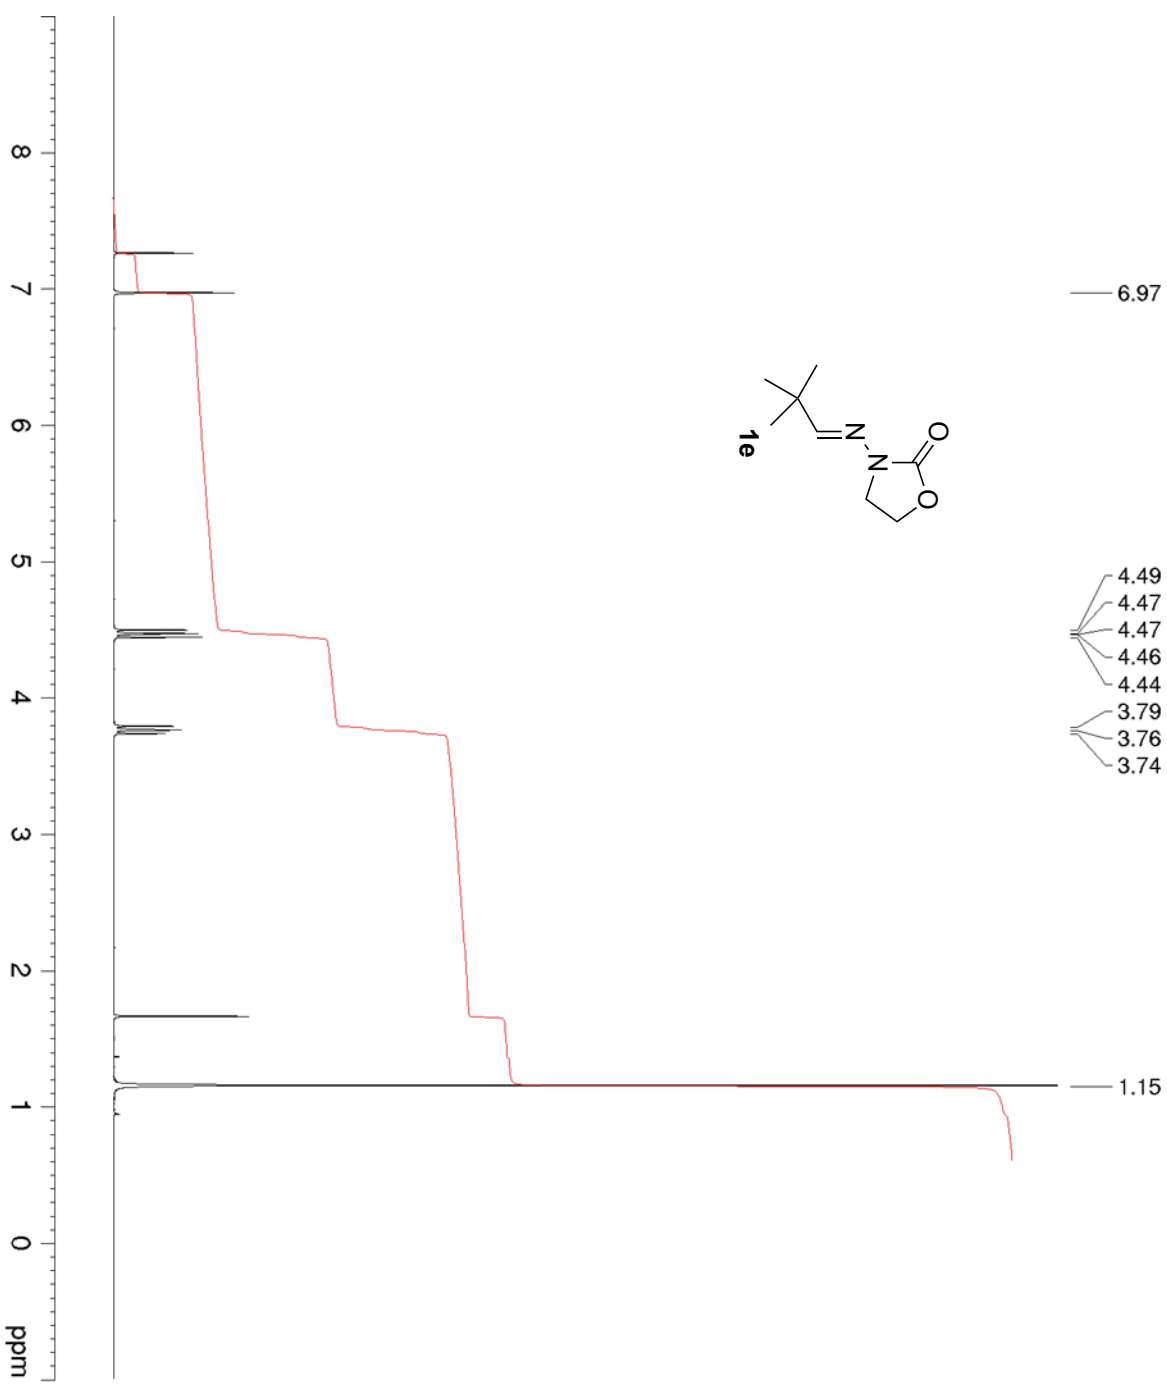

Current Data Parameters  
 NAME SC-03-147 1H wash  
 EXPNO 10  
 PROCNO 1

F2 - Acquisition Parameters  
 Date\_ 20190612  
 Time 13:38

INSTRUM FOUJIER300  
 PROBHD 5 mm DUL 13C-1  
 PULPROG zg30

TD 65536  
 SOLVENT CDCl3  
 NS 8  
 DS 0

SWH 6103.516 Hz  
 FIDRES 0.093132 Hz  
 AQC 5.3687091 sec

RG 59.1213  
 DW 81.920 usec  
 DE 6.50 usec  
 TE 294.5 K

D1 1.00000000 sec  
 TD0 1

==== CHANNEL f1 =====  
 SFO1 300.1818537 MHz  
 NUC1 1H  
 P1 15.00 usec  
 PLW1 13.80399990 W

F2 - Processing parameters  
 SI 65536  
 SF 300.1800049 MHz  
 WDW EM

SSB 0  
 LB 0.30 Hz  
 GB 0  
 PC 1.00



156.2  
154.7

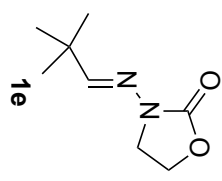

61.3  
42.5  
35.3  
27.7

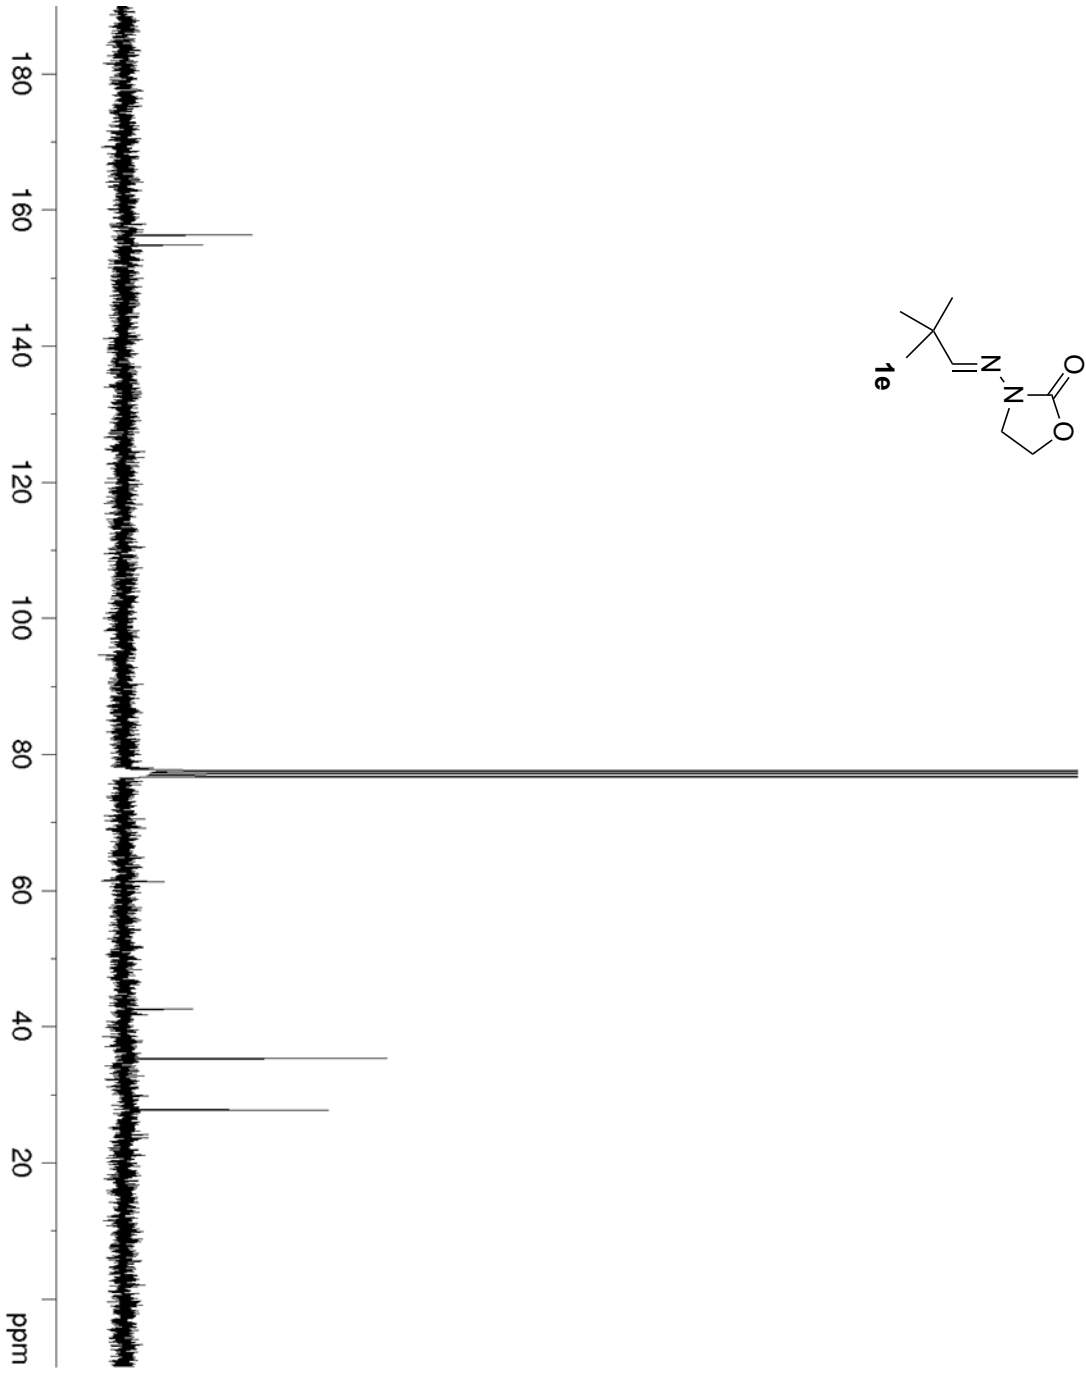

Current Data Parameters  
 NAME SC-03-147 13C  
 EXPNO 10  
 PROCNO 1

F2 - Acquisition Parameters  
 Date\_ 20190615  
 Time 13:32

INSTRUM FOUJIER300  
 PROBHD 5 mm DUL 13C-1  
 PULPROG zgpg30  
 TD 65536  
 SOLVENT CDC13  
 NS 845  
 DS 4  
 SWH 24414.063 Hz  
 FIDRES 0.372529 Hz  
 AQC 1.3421773 sec  
 RG 501.187  
 DW 20.480 usec  
 DE 6.50 usec  
 TE 294.5 K

D1 4.00000000 sec  
 D11 0.03000000 sec  
 D31 0.00001500 sec  
 D40 0.02560300 sec  
 L4 40  
 L5 115  
 P32 90.00 usec  
 TD0 1

===== CHANNEL f1 =====  
 SFO1 75.4878687 MHz  
 NUC1 13C  
 P1 15.00 usec  
 PLW1 22.00000000 W

===== CHANNEL f2 =====  
 SFO2 300.1812007 MHz  
 NUC2 1H  
 CPDPRG2 waltz16  
 PCPD2 90.00 usec  
 PLW2 13.80399990 W  
 PLW12 0.38343999 W  
 PLW13 0.31059000 W

F2 - Processing parameters  
 SI 32768  
 SF 75.4803124 MHz  
 WDW EM  
 SSB 0  
 LB 1.00 Hz  
 GB 0  
 PC 1.40

7.33  
7.33  
7.32  
7.31  
7.30  
7.30  
7.30  
7.29  
7.28  
7.28  
7.26  
4.62  
4.62  
4.12  
4.10  
4.09  
4.07  
3.99  
3.97  
3.95  
3.95  
3.94  
3.93  
3.92  
3.91  
3.44  
3.41  
3.41  
3.38  
3.35  
3.02  
3.00  
2.99  
2.97  
2.96  
1.65  
1.64  
1.63  
1.62  
1.61  
1.59  
1.25  
1.16  
1.15  
1.12  
1.11  
1.09  
1.08  
1.07  
-0.00

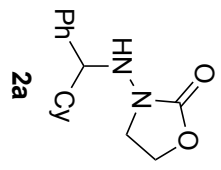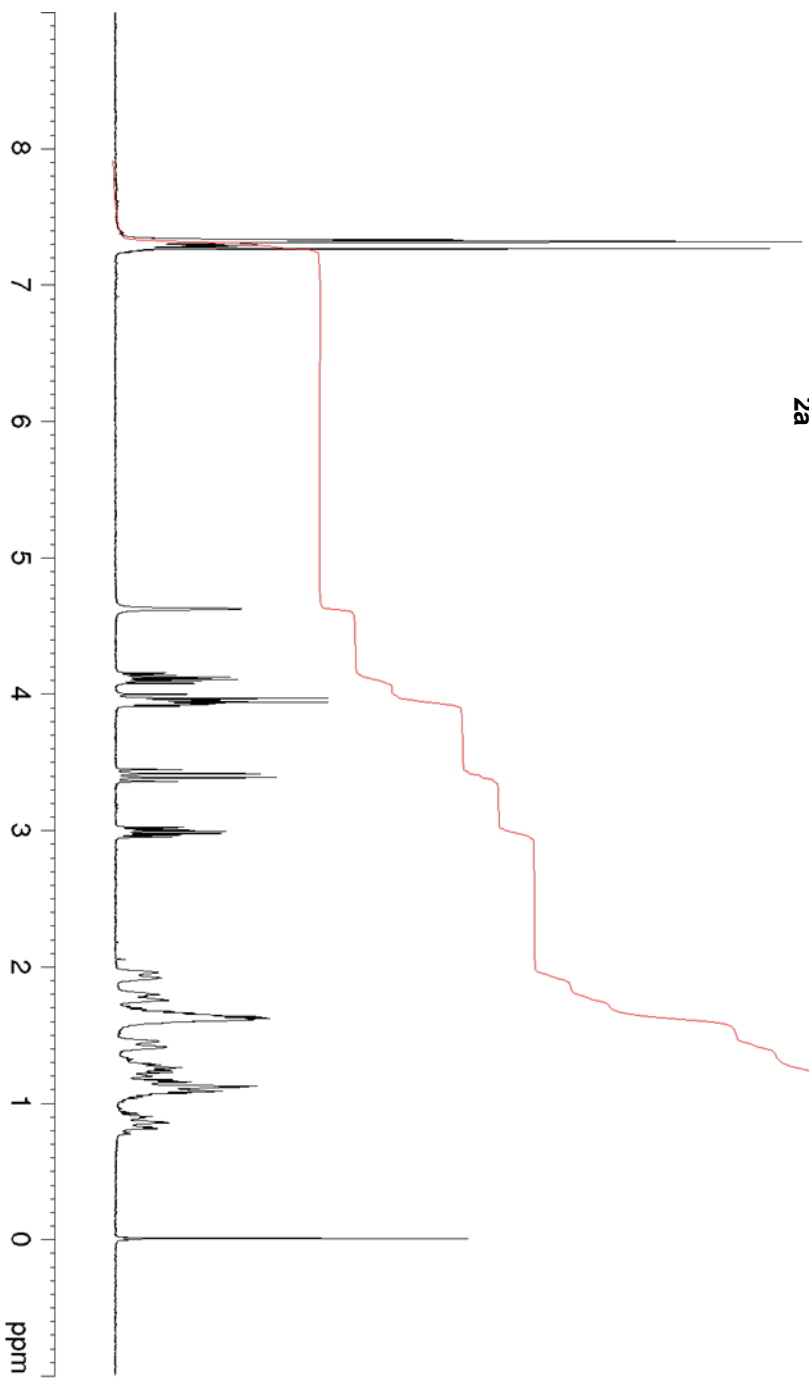

Current Data Parameters  
NAME SC-02-196 Trxns 13-19  
EXPNO 1  
PROCNO 1

F2 - Acquisition Parameters  
Date\_ 20180419  
Time 15:53

INSTRUM FOUERIER300  
PROBHD 5 mm DUL 13C-1  
PULPROG zg30  
TD 65536  
SOLVENT CDC13  
NS 8  
DS 2  
SWH 6103.516 Hz  
FIDRES 0.093132 Hz  
AQ 5.3687091 sec  
RG 59.732  
DW 81.920 usec  
DE 6.50 usec  
TE 294.4 K  
D1 1.00000000 sec  
TD0 1

==== CHANNEL f1 =====  
SFO1 300.1818537 MHz  
NUC1 1H  
P1 15.00 usec  
PLW1 13.80399990 W

F2 - Processing parameters  
SI 65536  
SF 300.1800039 MHz  
WDW EM  
SSB 0  
LB 0.30 Hz  
GB 0  
PC 1.00

158.8  
 140.9  
 128.8  
 128.1  
 127.5  
 69.6  
 61.4  
 47.9  
 41.9  
 30.2  
 29.1  
 26.4  
 26.2

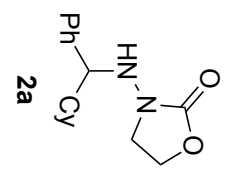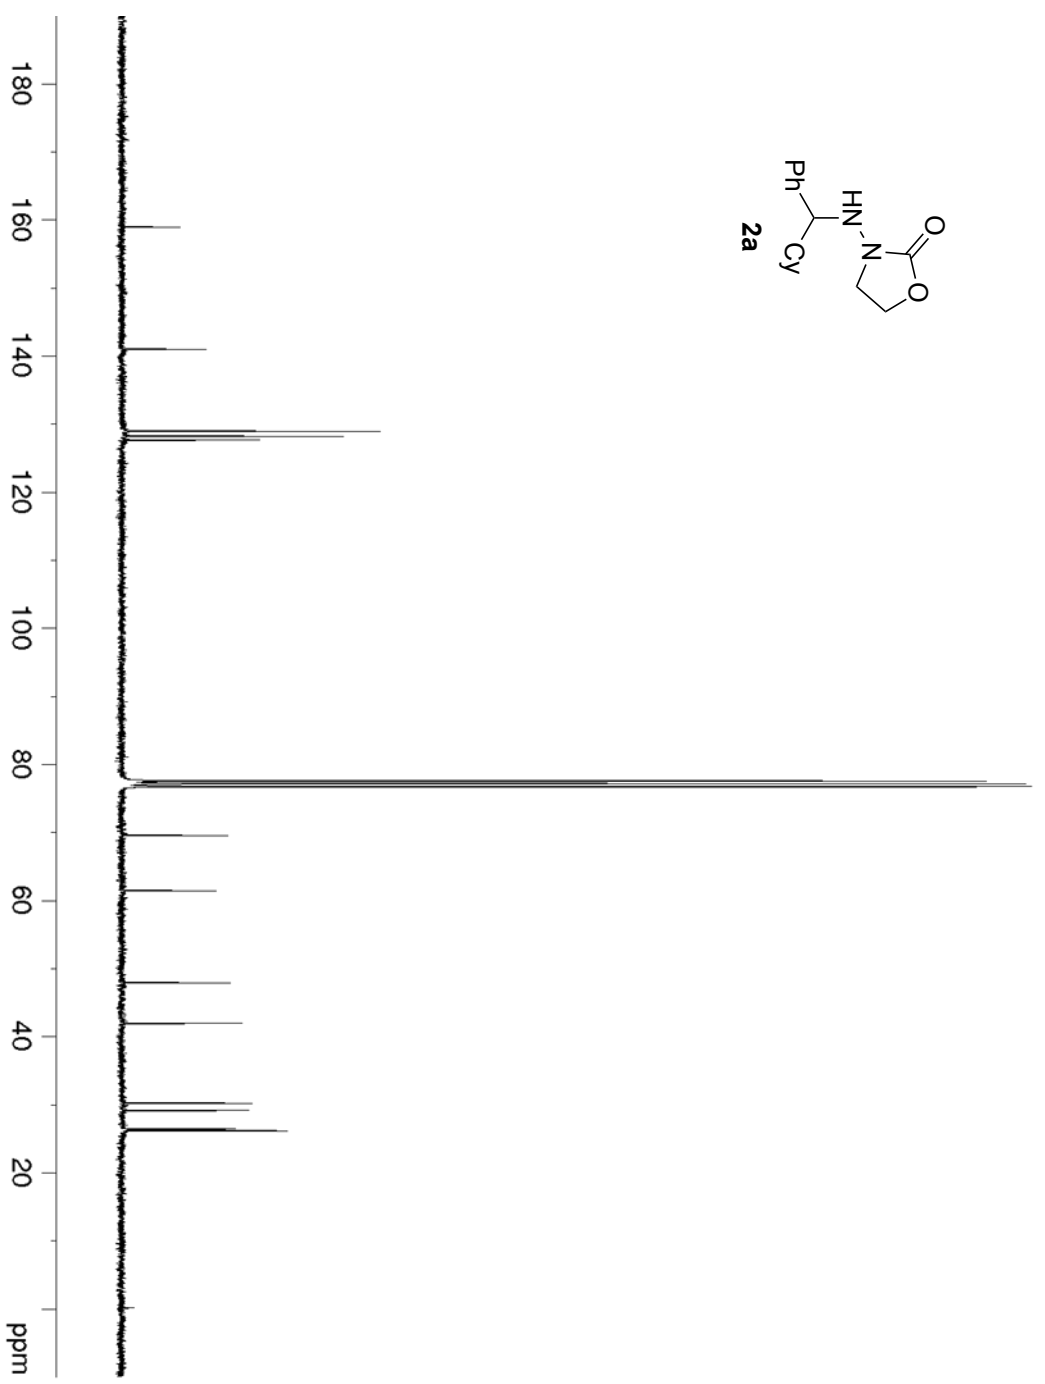

Current Data Parameters  
 NAME SC-02-196 13C  
 EXPNO 1  
 PROCNO 1

F2 - Acquisition Parameters  
 Date\_ 20180510  
 Time 19:51

INSTRUM FOUJIER300  
 PROBHD 5 mm DUL 13C-1  
 PULPROG zgpg30

TD 65536  
 SOLVENT CDC13

NS 3500  
 DS 4  
 SWH 24414.063 Hz  
 FIDRES 0.372529 Hz

AQ 1.3421773 sec  
 RG 501.187  
 DW 20.480 usec  
 DE 6.50 usec  
 TE 294.7 K

D1 2.00000000 sec  
 D11 0.03000000 sec  
 D31 0.00001500 sec  
 D40 0.030008300 sec

L4 40  
 L5 57  
 P32 90.00 usec  
 TDO 1

===== CHANNEL f1 =====  
 SFO1 75.4878687 MHz  
 NUC1 13C  
 P1 15.00 usec  
 PLW1 22.00000000 W

===== CHANNEL f2 =====  
 SFO2 300.1812007 MHz  
 NUC2 1H  
 CPDPRG2 waltz16  
 PCPD2 90.00 usec  
 PLW2 13.80399990 W  
 PLW12 0.38343999 W  
 PLW13 0.31059000 W

F2 - Processing parameters  
 SI 32768  
 SF 75.4803128 MHz  
 WDW EM  
 SSB 0  
 LB 1.00 Hz  
 GB 0  
 PC 1.40

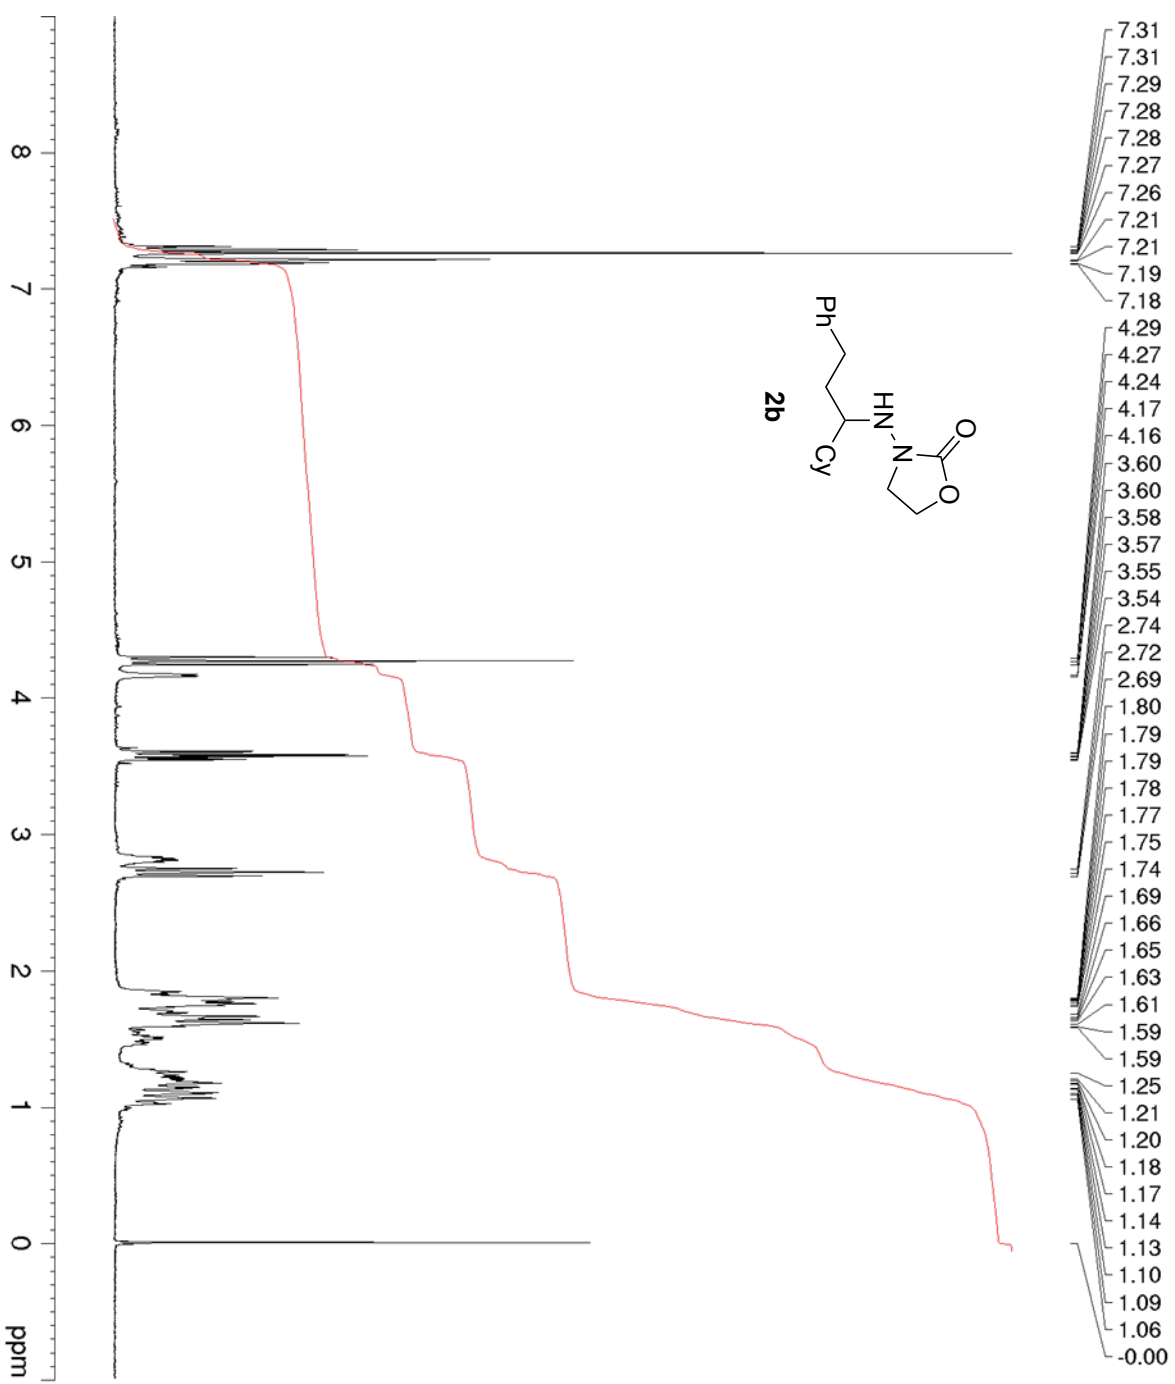

Current Data Parameters  
 NAME SC-02-265 ftrns 5-6  
 EXPNO 1  
 PROCNO 1

F2 - Acquisition Parameters  
 Date\_ 20180702  
 Time 9:51

INSTRUM FOURIER300  
 PROBHD 5 mm DUL 13C-1  
 PULPROG zg30  
 TD 65536  
 SOLVENT CDC13  
 NS 8  
 DS 2  
 SWH 6103.516 Hz  
 FIDRES 0.093132 Hz  
 AQ 5.3687091 sec  
 RG 32  
 DW 81.920 usec  
 DE 6.50 usec  
 TE 294.7 K  
 D1 1.00000000 sec  
 TD0 1

==== CHANNEL f1 =====  
 SFO1 300.1818537 MHz  
 NUC1 1H  
 P1 15.00 usec  
 PLW1 13.80399990 W

F2 - Processing parameters  
 SI 65536  
 SF 300.1800052 MHz  
 WDW EM  
 SSB 0  
 LB 0.30 Hz  
 GB 0  
 PC 1.00

- 159.3
- 142.4
- 128.5
- 128.5
- 125.9
- 63.6
- 61.3
- 48.4
- 39.5
- 32.6
- 31.0
- 29.4
- 27.9
- 26.8
- 26.7
- 26.7

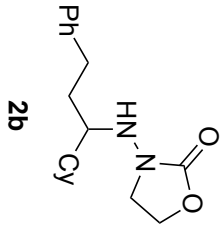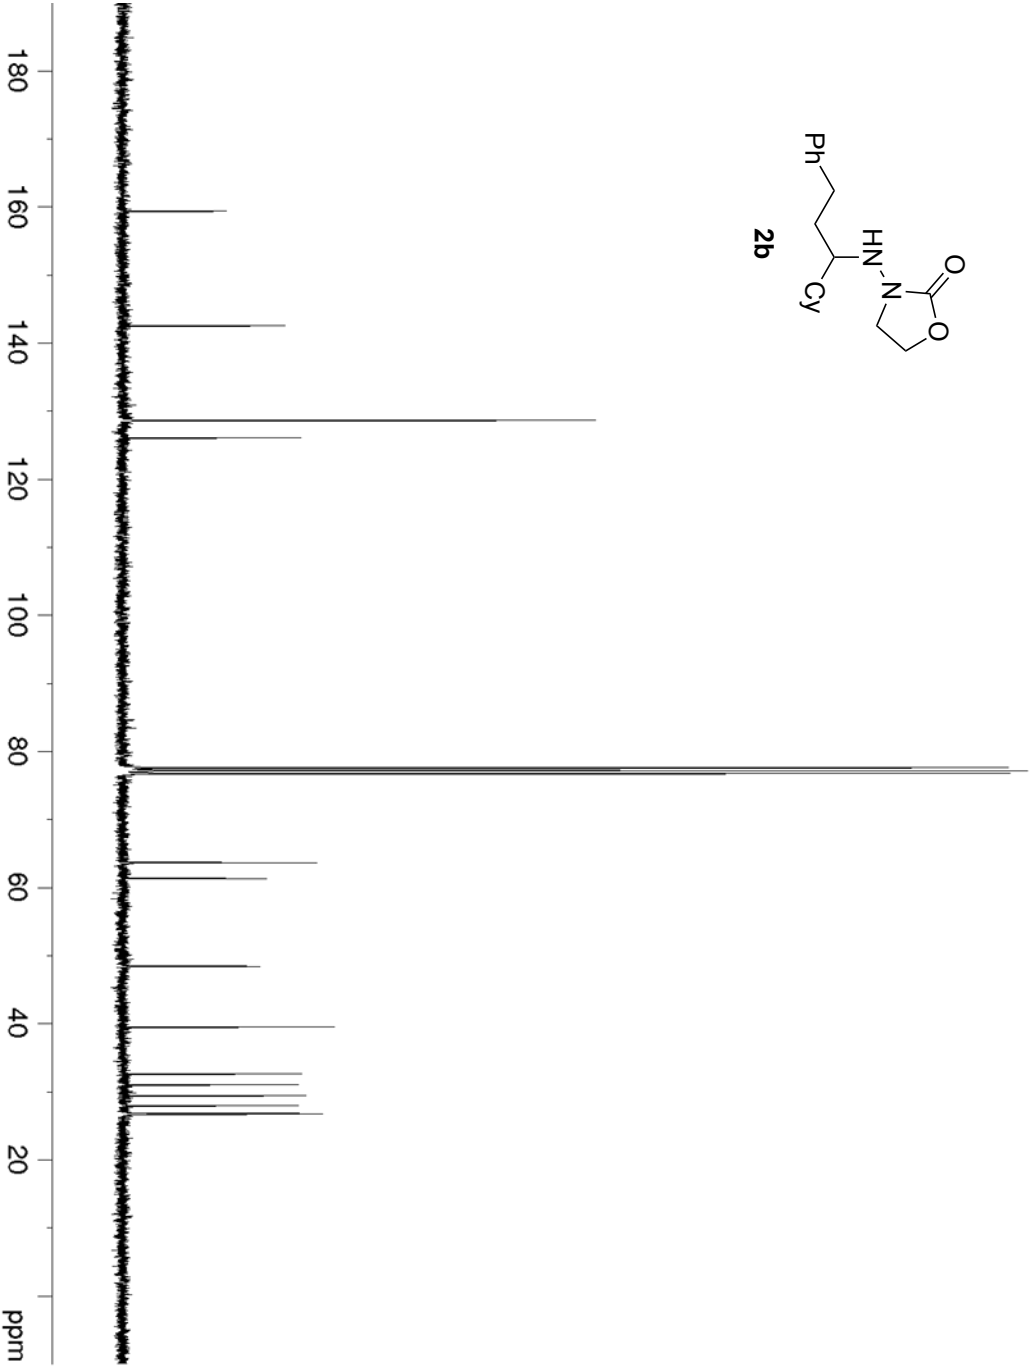

Current Data Parameters  
 NAME SC-03-175-13C  
 EXPNO 1  
 PROCNO 1

F2 - Acquisition Parameters  
 Date\_ 20190328  
 Time 15:04

INSTRUM FOUJIER300  
 PROBHD 5 mm DUL-13C-1  
 PULPROG zgpg30  
 TD 65536  
 SOLVENT CDC13  
 NS 850  
 DS 0

SWH 24414.063 Hz  
 FIDRES 0.372529 Hz  
 AQ 1.3421773 sec  
 RG 501.187  
 DW 20.480 usec  
 DE 6.50 usec  
 TE 294.2 K

D1 2.00000000 sec  
 D11 0.03000000 sec  
 D31 0.00001500 sec  
 D40 0.03008300 sec  
 L4 40  
 L5 57  
 P32 90.00 usec  
 TD0 1

===== CHANNEL f1 =====  
 SFO1 75.4878687 MHz  
 NUC1 13C  
 P1 15.00 usec  
 PLW1 22.00000000 W

===== CHANNEL f2 =====  
 SFO2 300.1812007 MHz  
 NUC2 1H  
 CPDPRG2 waltz16  
 PCPD2 90.00 usec  
 PLW2 13.80399990 W  
 PLW12 0.38343999 W  
 PLW13 0.31059000 W

F2 - Processing parameters  
 SI 32768  
 SF 75.4803139 MHz  
 WDW EM  
 SSB 0  
 LB 1.00 Hz  
 GB 0  
 PC 1.40

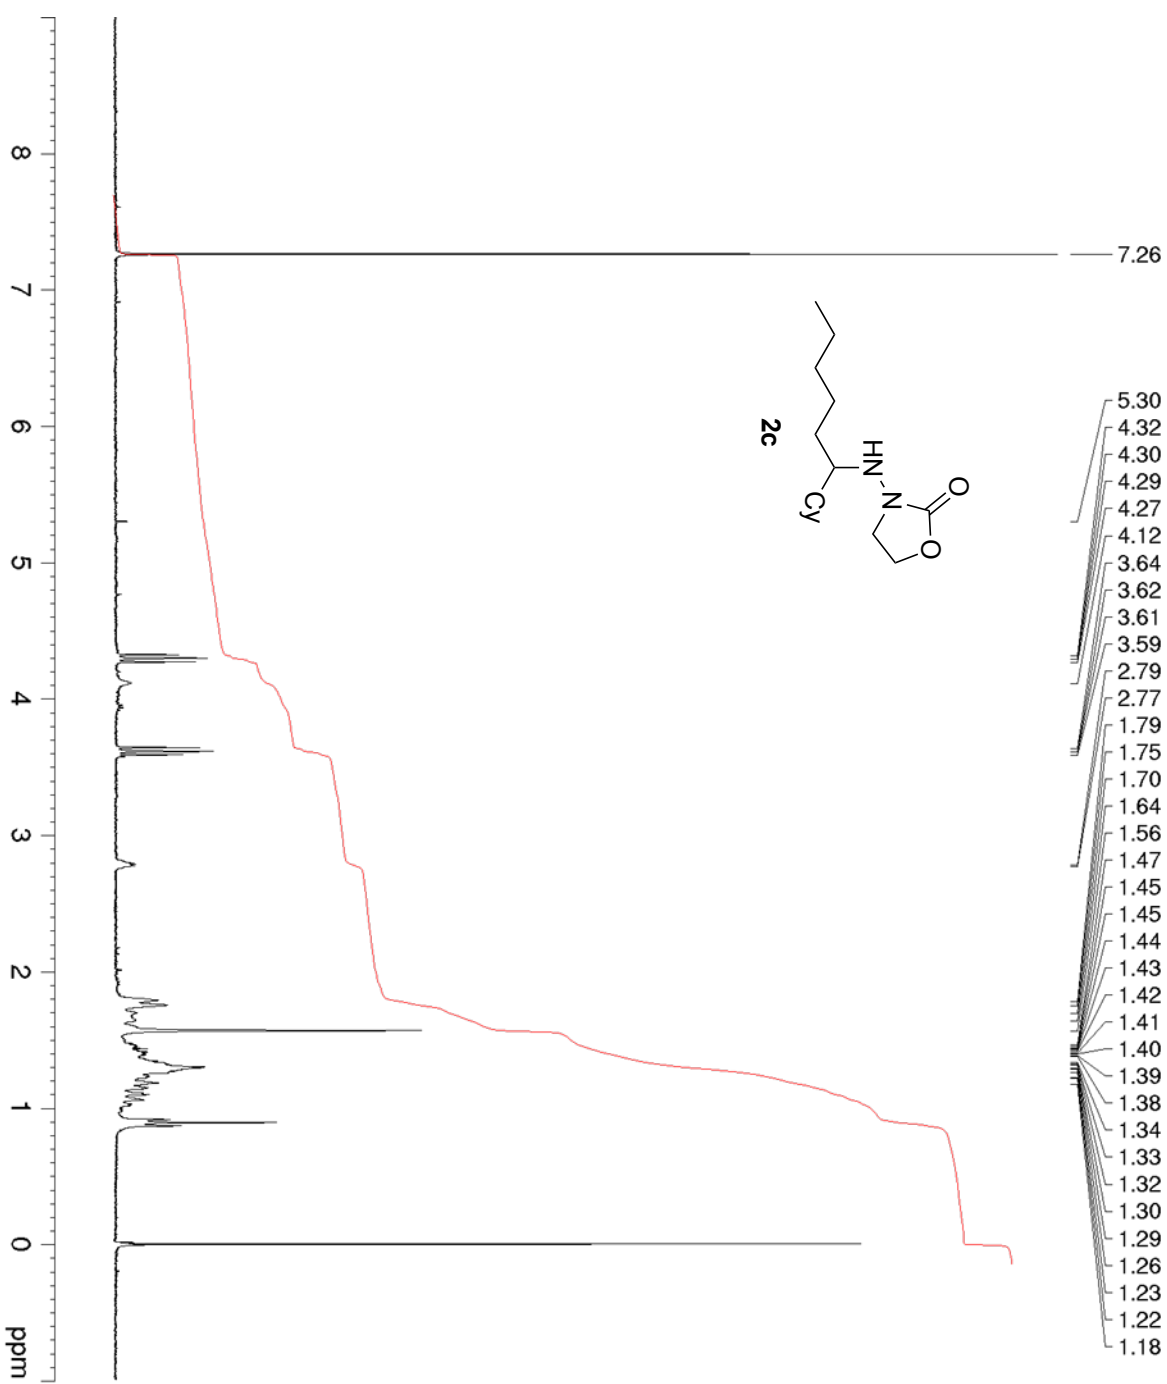

- 5.30
- 4.32
- 4.30
- 4.29
- 4.27
- 4.12
- 3.64
- 3.62
- 3.61
- 3.59
- 2.79
- 2.77
- 1.79
- 1.75
- 1.70
- 1.64
- 1.56
- 1.47
- 1.45
- 1.45
- 1.44
- 1.43
- 1.42
- 1.41
- 1.40
- 1.39
- 1.38
- 1.34
- 1.33
- 1.32
- 1.30
- 1.29
- 1.26
- 1.23
- 1.22
- 1.18

Current Data Parameters  
 NAME SC-03-150 1H  
 EXPNO 1  
 PROCNO 1

F2 - Acquisition Parameters  
 Date\_ 20190304  
 Time 16.26

INSTRUM FOUJIER300  
 PROBHD 5 mm DUL 13C-1  
 PULPROG zg30  
 TD 65536  
 SOLVENT CDC13  
 NS 8  
 DS 0  
 SWH 6103.516 Hz  
 FIDRES 0.093132 Hz  
 AQ 5.3687091 sec  
 RG 103.315  
 DW 81.920 usec  
 DE 6.50 usec  
 TE 295.2 K  
 D1 0.10000000 sec  
 TD0 1

===== CHANNEL f1 =====  
 SFO1 300.1818537 MHz  
 NUC1 1H  
 P1 15.00 usec  
 PLW1 13.80399990 W

F2 - Processing parameters  
 SI 65536  
 SF 300.1800050 MHz  
 WDW EM  
 SSB 0  
 LB 0.30 Hz  
 GB 0  
 PC 1.00

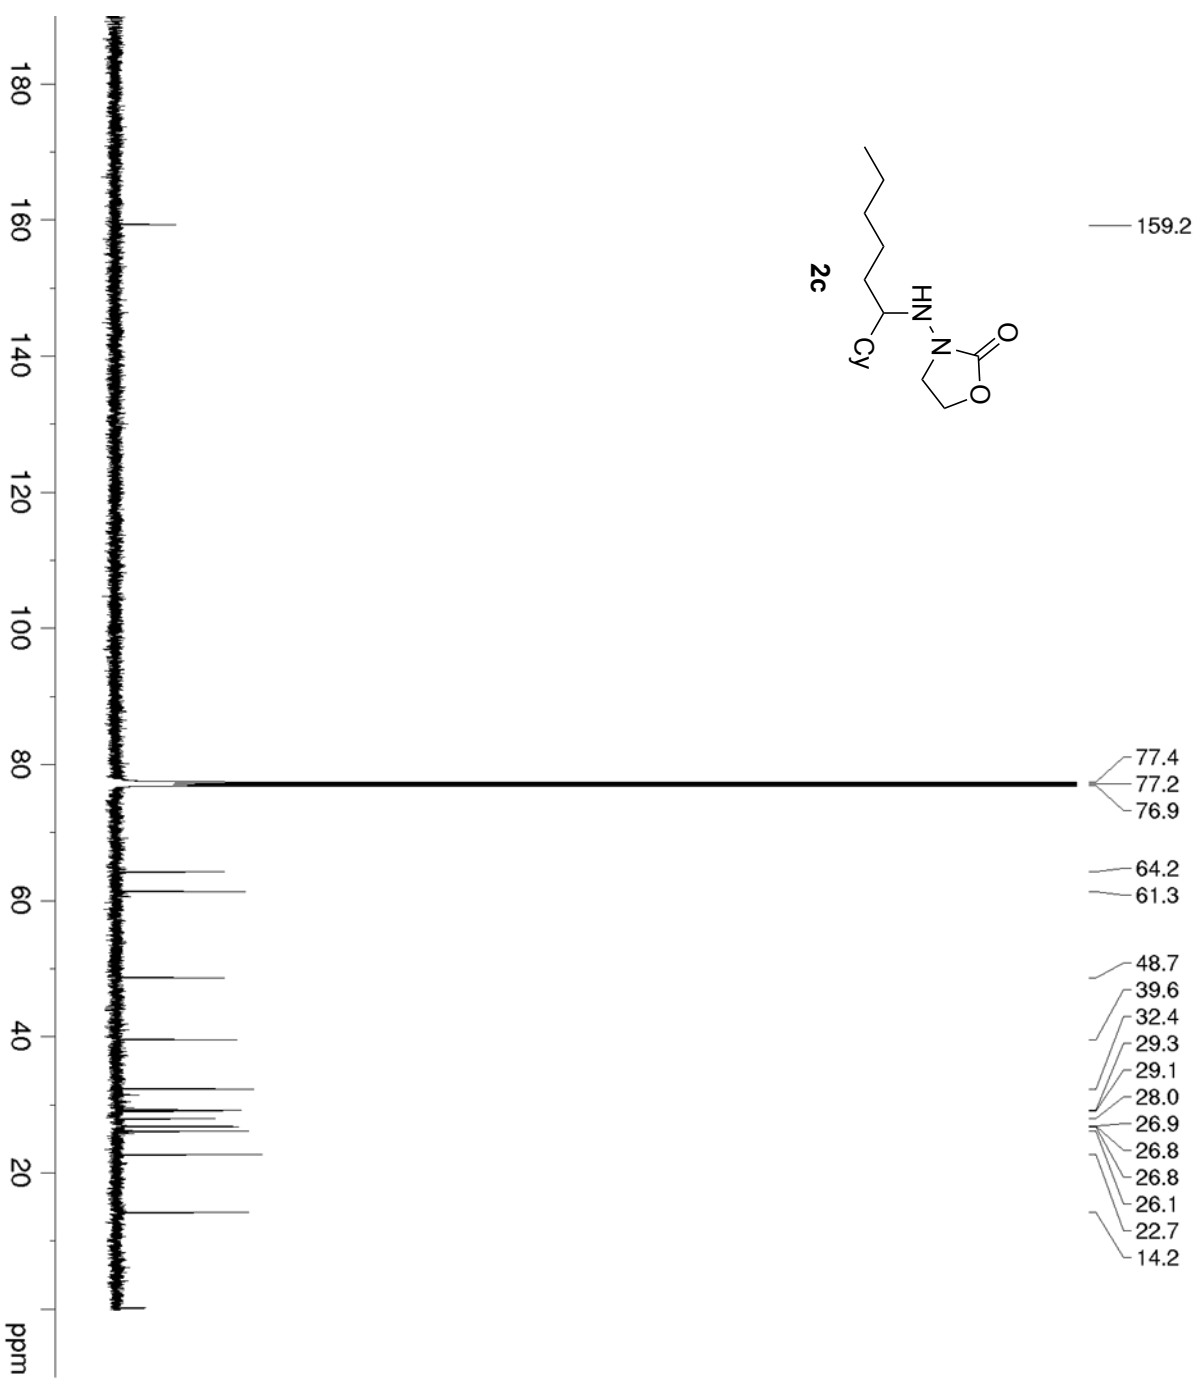

Current Data Parameters  
 NAME sc-03-150  
 EXPNO 2  
 PROCNO 1

F2 - Acquisition Parameters  
 Date\_ 20190307  
 Time 9:06

INSTRUM spect  
 PROBHD 5 mm PABBO BB-  
 PULPROG zgpg30

TD 65536  
 SOLVENT CDCI3

NS 1024  
 DS 4

SWH 25252.525 Hz  
 FIDRES 0.385323 Hz

AQ 1.2976128 sec  
 RG 23170.5

DW 19.800 usec  
 DE 6.50 usec

TE 297.2 K  
 D1 10.00000000 sec

D11 0.03000000 sec  
 TD0 1

===== CHANNEL f1 =====  
 NUC1 13C

P1 10.00 usec  
 PL1 -1.70 dB

PL1W 148.61408997 W  
 SFO1 125.8131151 MHz

===== CHANNEL f2 =====  
 CPDPRG12 waitz16

NUC2 1H  
 PCPD2 80.00 usec

PL2 -1.10 dB  
 PL12 15.40 dB

PL13 17.40 dB  
 PL2W 19.41561890 W

PL12W 0.43466163 W  
 PL13W 0.27425295 W

SFO2 500.3020012 MHz

F2 - Processing parameters  
 SI 32768

SF 125.8005176 MHz  
 WDW EM

SSB 0  
 LB 1.00 Hz  
 GB 0  
 PC 1.40

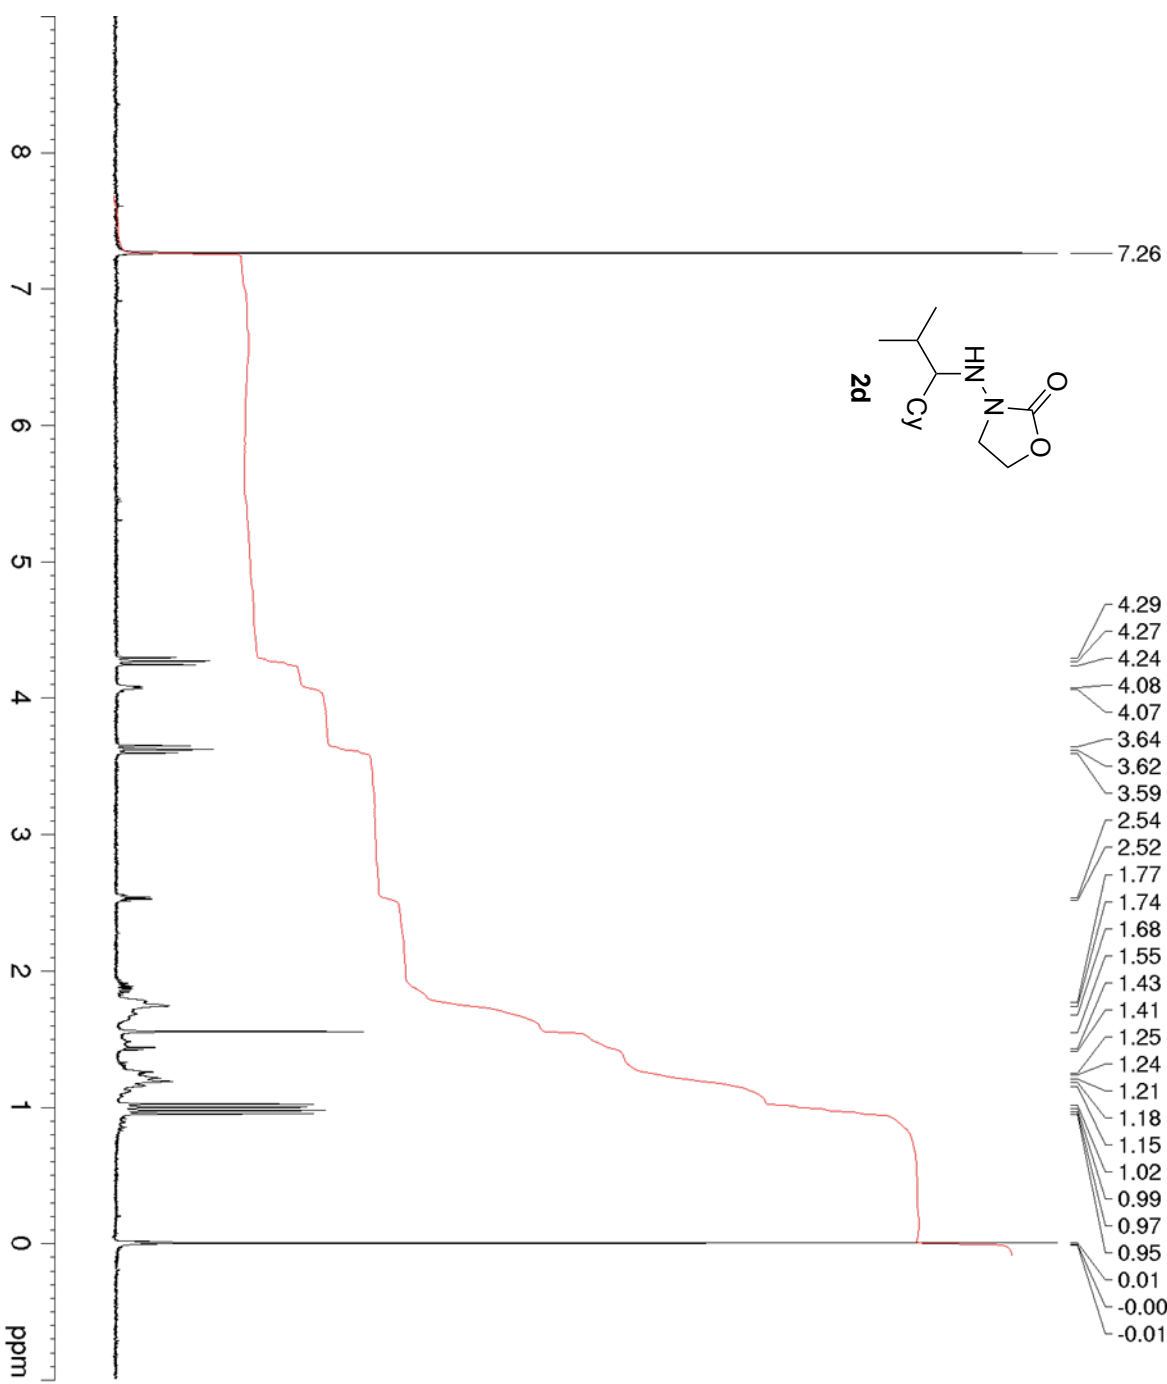

Current Data Parameters  
 NAME SC-03-138 1H  
 EXPNO 1  
 PROCNO 1

F2 - Acquisition Parameters  
 Date\_ 20190114  
 Time 15.45

INSTRUM FOUJIER300  
 PROBHD 5 mm DUL 13C-1  
 PULPROG zg30  
 TD 65536  
 SOLVENT CDCl3

NS 8  
 DS 2  
 SWH 6103.516 Hz  
 FIDRES 0.093132 Hz

RG 5.3687091 sec  
 282.504  
 DW 81.920 usec  
 DE 6.50 usec  
 TE 294.7 K

D1 1.00000000 sec  
 TD0 1

==== CHANNEL f1 =====  
 SFO1 300.1818537 MHz  
 NUC1 1H  
 P1 15.00 usec  
 PLW1 13.80399990 W

F2 - Processing parameters  
 SI 65536  
 SF 300.1800050 MHz  
 WDW EM  
 SSB 0  
 LB 0.30 Hz  
 GB 0  
 PC 1.00





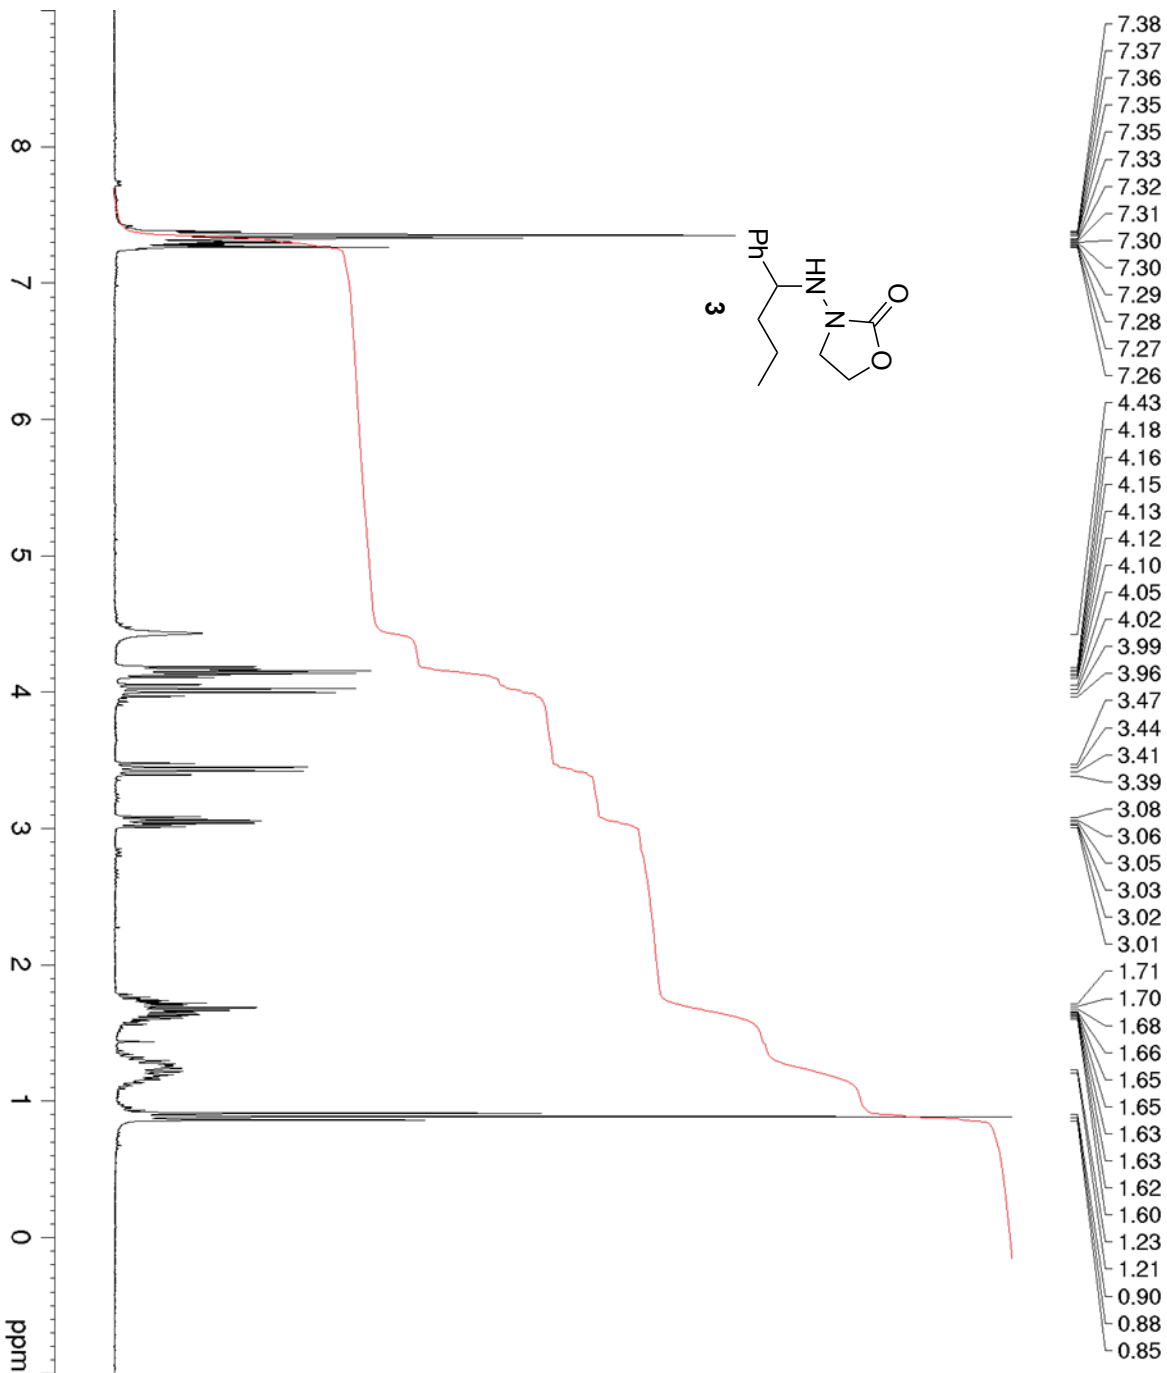

- 7.38
- 7.37
- 7.36
- 7.35
- 7.33
- 7.32
- 7.31
- 7.30
- 7.30
- 7.29
- 7.28
- 7.27
- 7.26
- 4.43
- 4.18
- 4.16
- 4.15
- 4.13
- 4.12
- 4.10
- 4.05
- 4.02
- 3.99
- 3.96
- 3.47
- 3.44
- 3.41
- 3.39
- 3.08
- 3.06
- 3.05
- 3.03
- 3.02
- 3.01
- 1.71
- 1.70
- 1.68
- 1.66
- 1.65
- 1.65
- 1.63
- 1.63
- 1.62
- 1.60
- 1.23
- 1.21
- 0.90
- 0.88
- 0.85

Current Data Parameters  
 NAME SC-03-122 1H  
 EXPNO 1  
 PROCNO 1

F2 - Acquisition Parameters  
 Date\_ 20190314  
 Time 14.45

INSTRUM FOUJIER300  
 PROBHD 5 mm DUL 13C-1  
 PULPROG zg30  
 TD 65536  
 SOLVENT CDCl3  
 NS 8  
 DS 0  
 SWH 6103.516 Hz  
 FIDRES 0.093132 Hz  
 AQ 5.3687091 sec  
 RG 32  
 DW 81.920 usec  
 DE 6.50 usec  
 TE 294.0 K  
 D1 1.00000000 sec  
 TD0 1

===== CHANNEL f1 =====  
 SFO1 300.1818537 MHz  
 NUC1 1H  
 P1 15.00 usec  
 PLW1 13.80399990 W

F2 - Processing parameters  
 SI 65536  
 SF 300.1800050 MHz  
 WDW EM  
 SSB 0  
 LB 0.30 Hz  
 GB 0  
 PC 1.00

158.9  
 141.9  
 128.5  
 128.1  
 127.8  
 64.3  
 61.5  
 48.1  
 37.3  
 19.2  
 14.2

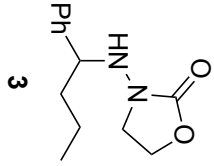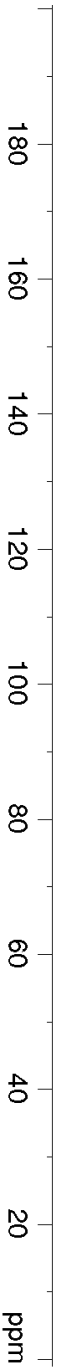

Current Data Parameters  
 NAME SC-03-122 13C  
 EXPNO 1  
 PROCNO 1

F2 - Acquisition Parameters  
 Date\_ 20190314  
 Time 17:00

INSTRUM FOUERIER300  
 PROBHD 5 mm DUL 13C-1  
 PULPROG zgpg30  
 TD 65536  
 SOLVENT CDCl3  
 NS 850  
 DS 0  
 SWH 24414.063 Hz  
 FIDRES 0.372529 Hz  
 AQC 1.3421773 sec  
 RG 501.187  
 DW 20.480 usec  
 DE 6.50 usec  
 TE 294.2 K

D1 2.00000000 sec  
 D11 0.03000000 sec  
 D31 0.00001500 sec  
 D40 0.030008300 sec  
 L4 40  
 L5 57  
 P32 90.00 usec  
 TD0 1

===== CHANNEL f1 =====  
 SFO1 75.4878687 MHz  
 NUC1 13C  
 P1 15.00 usec  
 PLW1 22.00000000 W

===== CHANNEL f2 =====  
 SFO2 300.1812007 MHz  
 NUC2 1H  
 CPDPRGf2 waltz16  
 PCPD2 90.00 usec  
 PLW2 13.80339990 W  
 PLW12 0.38343999 W  
 PLW13 0.31059000 W

F2 - Processing parameters  
 SI 32768  
 SF 75.4803131 MHz  
 WDW EM  
 SSB 0  
 LB 1.00 Hz  
 GB 0  
 PC 1.40

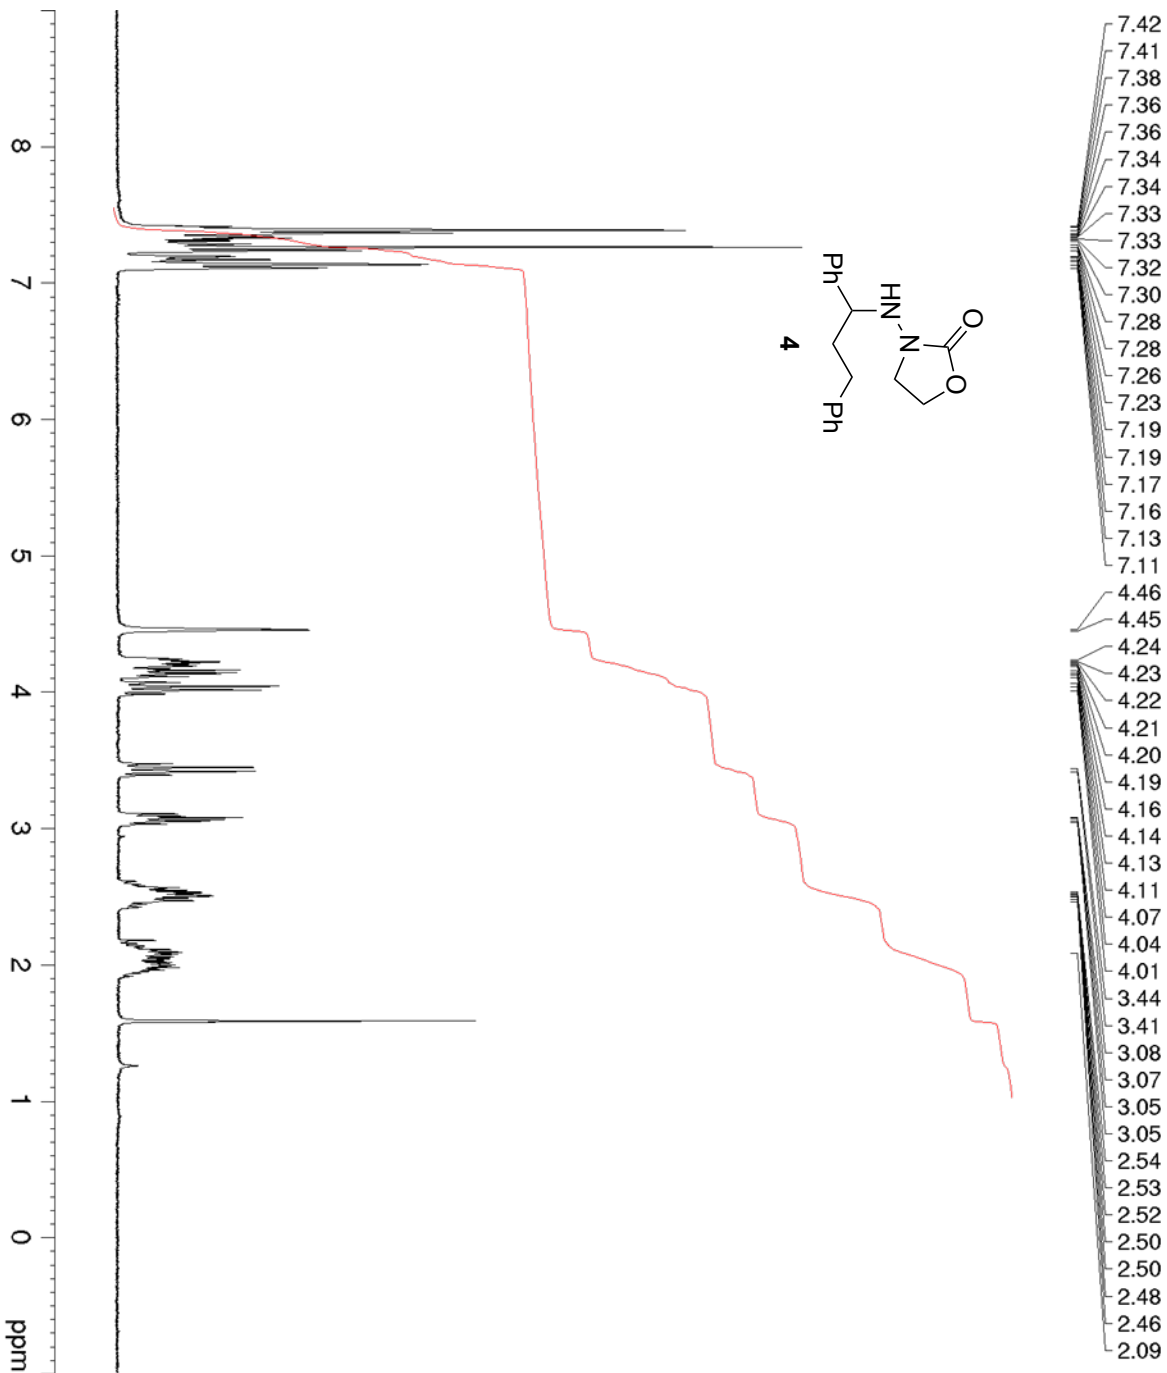

7.42  
7.41  
7.38  
7.36  
7.36  
7.34  
7.34  
7.33  
7.33  
7.32  
7.30  
7.28  
7.28  
7.26  
7.23  
7.19  
7.19  
7.17  
7.16  
7.13  
7.11  
4.46  
4.45  
4.24  
4.23  
4.22  
4.21  
4.20  
4.19  
4.16  
4.14  
4.13  
4.11  
4.07  
4.04  
4.01  
3.44  
3.41  
3.08  
3.07  
3.05  
3.05  
2.54  
2.53  
2.52  
2.50  
2.50  
2.48  
2.46  
2.09

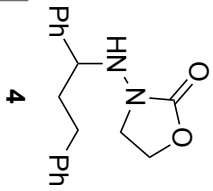

Current Data Parameters  
NAME SC-03-PhEt addn ox  
EXPNO 1  
PROCNO 1

F2 - Acquisition Parameters  
Date\_ 20190415  
Time 9:34

INSTRUM FOUJIER300  
PROBHD 5 mm DUL 13C-1  
PULPROG zg30  
TD 65536  
SOLVENT CDCl3  
NS 8  
DS 0  
SWH 6103.516 Hz  
FIDRES 0.093132 Hz  
AQ 5.3687091 sec  
RG 72.4421  
DW 81.920 usec  
DE 6.50 usec  
TE 294.1 K  
D1 1.00000000 sec  
TD0 1

===== CHANNEL f1 =====  
SFO1 300.1818537 MHz  
NUC1 1H  
P1 15.00 usec  
PLW1 13.80399990 W

F2 - Processing parameters  
SI 65536  
SF 300.1800053 MHz  
WDW EM  
SSB 0  
LB 0.30 Hz  
GB 0  
PC 1.00

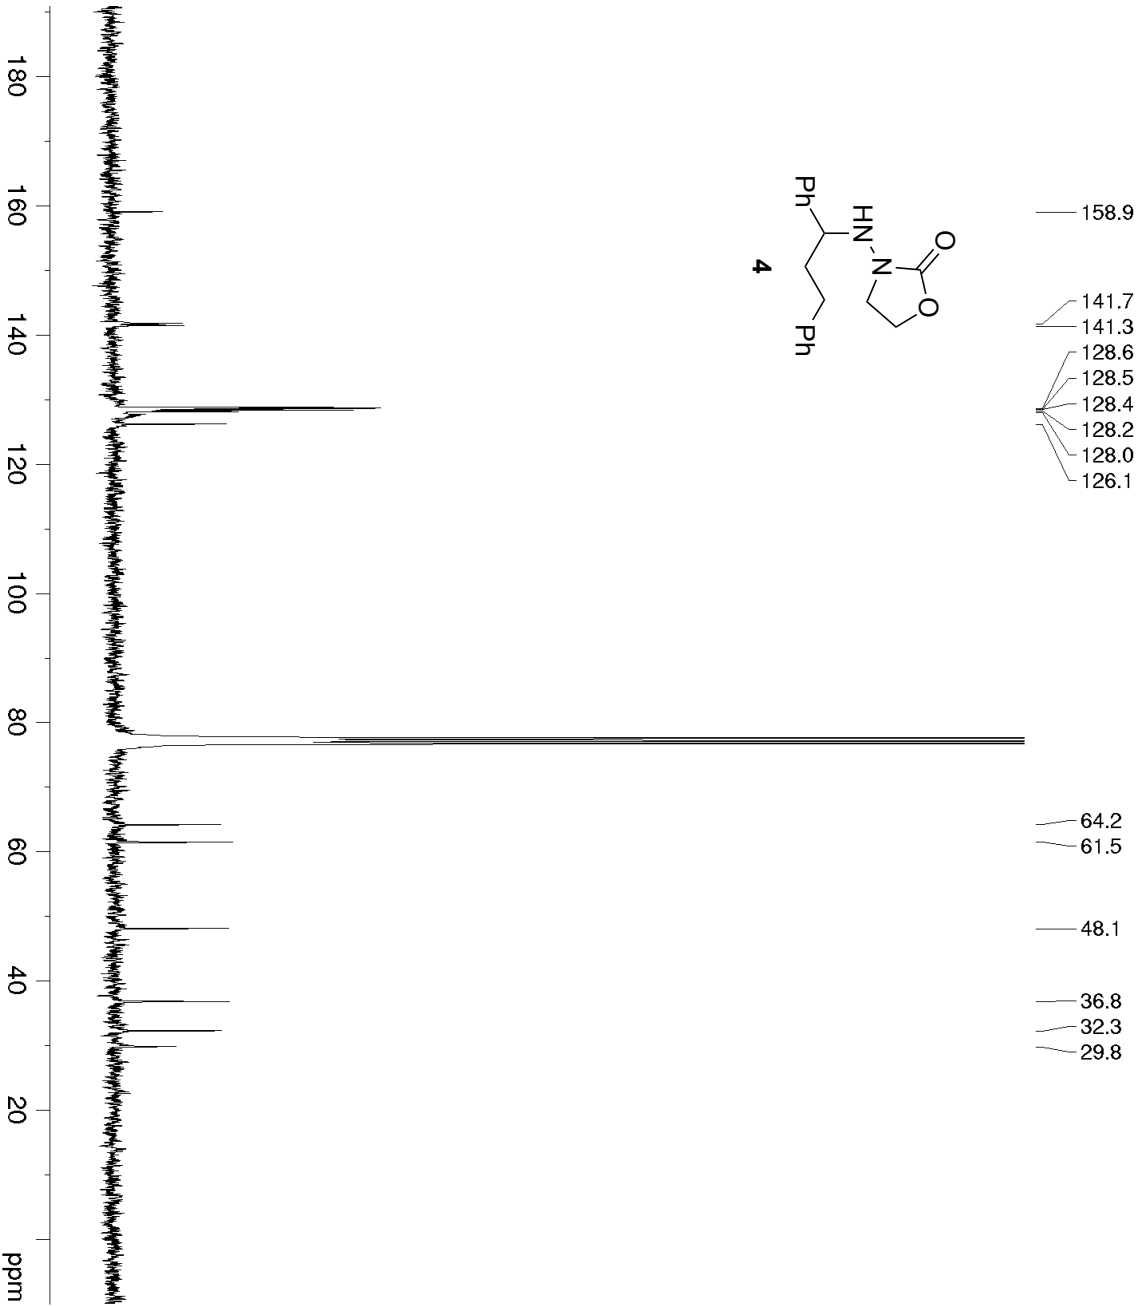

Current Data Parameters  
 NAME SC-03-PhEt ox 13C  
 EXPNO 2  
 PROCNO 1

F2 - Acquisition Parameters  
 Date\_ 20190801  
 Time 3.42  
 INSTRUM spect  
 PROBD 5 mm QNP 1H/13  
 PULPROG zgpg30  
 TD 65536  
 SOLVENT CDCl3  
 NS 4000  
 DS 0  
 SWH 19960.080 Hz  
 FIDRES 0.304567 Hz  
 AQ 1.6416768 sec  
 RG 16384  
 DW 25.050 usec  
 DE 6.50 usec  
 TE 300.0 K  
 D1 5.00000000 sec  
 d11 0.03000000 sec  
 TD0 1

===== CHANNEL f1 =====  
 NUC1 13C  
 P1 9.50 usec  
 PL1 0 dB  
 SFO1 75.4803253 MHz

===== CHANNEL f2 =====  
 CPDPRG2 waltz16  
 NUC2 1H  
 PCPD2 87.00 usec  
 PL2 0 dB  
 PL12 20.00 dB  
 SFO2 300.1512006 MHz

F2 - Processing parameters  
 SI 32768  
 SF 75.4727666 MHz  
 WDW EM  
 SSB 0  
 LB 3.50 Hz  
 GB 0  
 PC 1.40

- 7.31
- 7.30
- 7.30
- 7.29
- 7.28
- 7.27
- 7.26
- 7.21
- 7.19
- 7.17
- 7.16
- 7.16
- 4.30
- 4.28
- 4.25
- 4.14
- 3.62
- 3.59
- 3.57
- 3.09
- 3.07
- 3.05
- 2.75
- 2.73
- 2.72
- 2.70
- 2.68
- 2.67
- 2.65
- 1.79
- 1.78
- 1.77
- 1.77
- 1.76
- 1.75
- 1.74
- 1.72
- 1.70
- 1.69
- 1.58
- 1.36
- 1.36
- 1.34
- 1.32
- 1.31
- 1.25

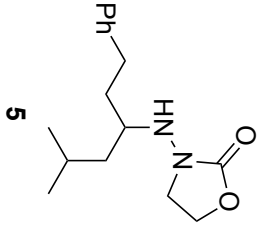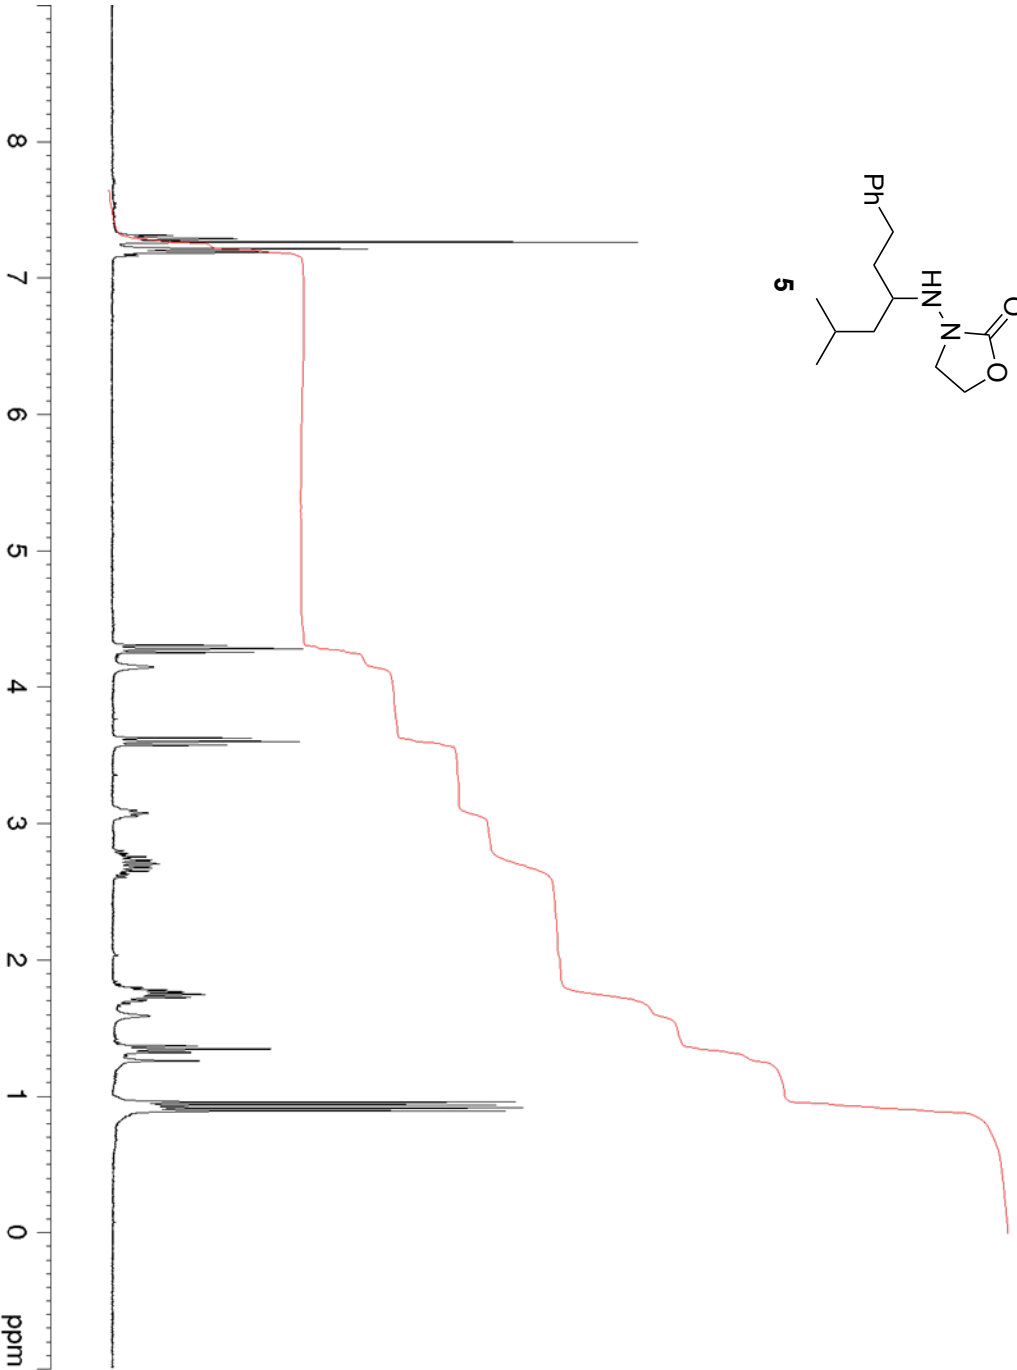

Current Data Parameters  
 NAME SC-03-176  
 EXPNO 1  
 PROCNO 1

F2 - Acquisition Parameters  
 Date\_ 20190327  
 Time 15.43

INSTRUM FOUJIER300  
 PROBHD 5 mm DUL 13C-1  
 PULPROG zg30  
 TD 65536  
 SOLVENT CDCl3  
 NS 8  
 DS 0  
 SWH 6103.516 Hz  
 FIDRES 0.093132 Hz  
 RG 5.3687091 sec  
 DW 80.0521  
 DE 81.920 usec  
 TE 294.4 K  
 D1 6.50 usec  
 TD0 1.00000000 sec

===== CHANNEL f1 =====  
 SFO1 300.1818537 MHz  
 NUC1 1H  
 P1 15.00 usec  
 PLW1 13.80399990 W

F2 - Processing parameters  
 SI 65536  
 SF 300.1800050 MHz  
 WDW EM  
 SSB 0  
 LB 0.30 Hz  
 GB 0  
 PC 1.00

Current Data Parameters  
 NAME SC-03-176 13C  
 EXPNO 1  
 PROCNO 1

F2 - Acquisition Parameters  
 Date\_ 20190328  
 Time 10:09

INSTRUM FOUJIER300  
 PROBHD 5 mm DUL 13C-1  
 PULPROG zgpg30  
 TD 65536  
 SOLVENT CDCI3  
 NS 1000  
 DS 4

SWH 24414.063 Hz  
 FIDRES 0.372529 Hz  
 AQC 1.3421773 sec  
 RG 501.187  
 DW 20.480 usec  
 DE 6.50 usec  
 TE 294.3 K  
 D1 2.00000000 sec  
 D11 0.03000000 sec  
 D31 0.00001500 sec  
 D40 0.03008300 sec  
 L4 40  
 L5 57  
 P32 90.00 usec  
 TD0 1

===== CHANNEL f1 =====  
 SFO1 75.4878687 MHz  
 NUC1 13C  
 P1 15.00 usec  
 PLW1 22.00000000 W

===== CHANNEL 12 =====  
 SFO2 300.1812007 MHz  
 NUC2 1H  
 CPDPRG12 waltz16  
 PCPD2 90.00 usec  
 PLW2 13.80399990 W  
 PLW12 0.38343999 W  
 PLW13 0.31059000 W

F2 - Processing parameters  
 SI 32768  
 SF 75.4803116 MHz  
 WDW EM  
 SSB 0  
 LB 1.00 Hz  
 GB 0  
 PC 1.40

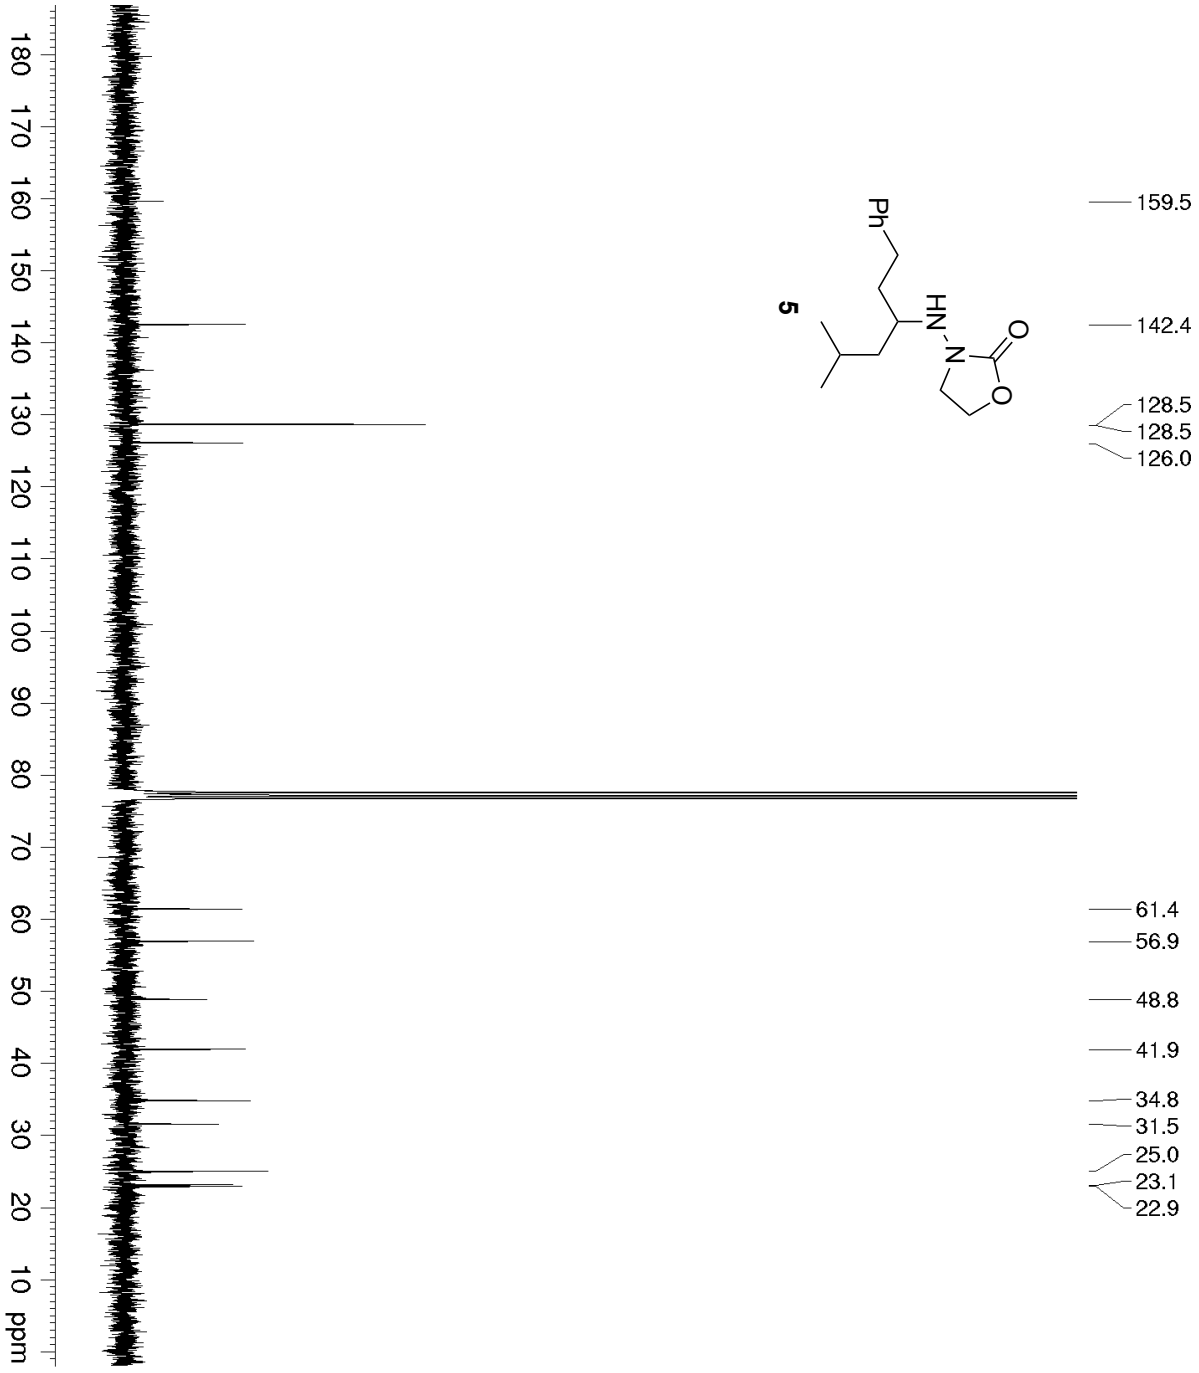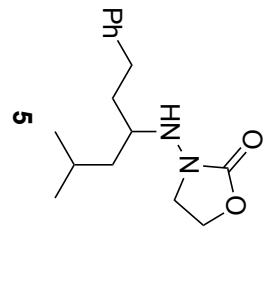

- 159.5
- 142.4
- 128.5
- 128.5
- 126.0
- 61.4
- 56.9
- 48.8
- 41.9
- 34.8
- 31.5
- 25.0
- 23.1
- 22.9

7.55  
7.55  
7.54  
7.53  
7.53  
7.52  
7.45  
7.43  
7.43  
7.42  
7.38  
7.37  
7.36  
7.35  
7.35  
7.33  
7.33  
7.26  
7.23  
7.21  
7.20  
7.16  
7.13  
5.42  
5.41  
3.81  
3.81  
3.79  
2.35  
1.67  
1.65  
1.64  
1.63  
1.62  
1.60  
1.43  
1.43  
1.27  
1.26  
1.23  
1.20  
1.19  
1.16  
1.14  
1.12  
1.11  
0.88  
0.86  
0.85  
-0.00

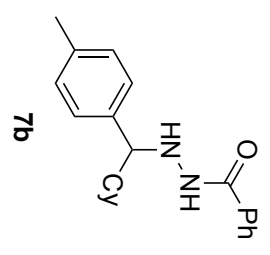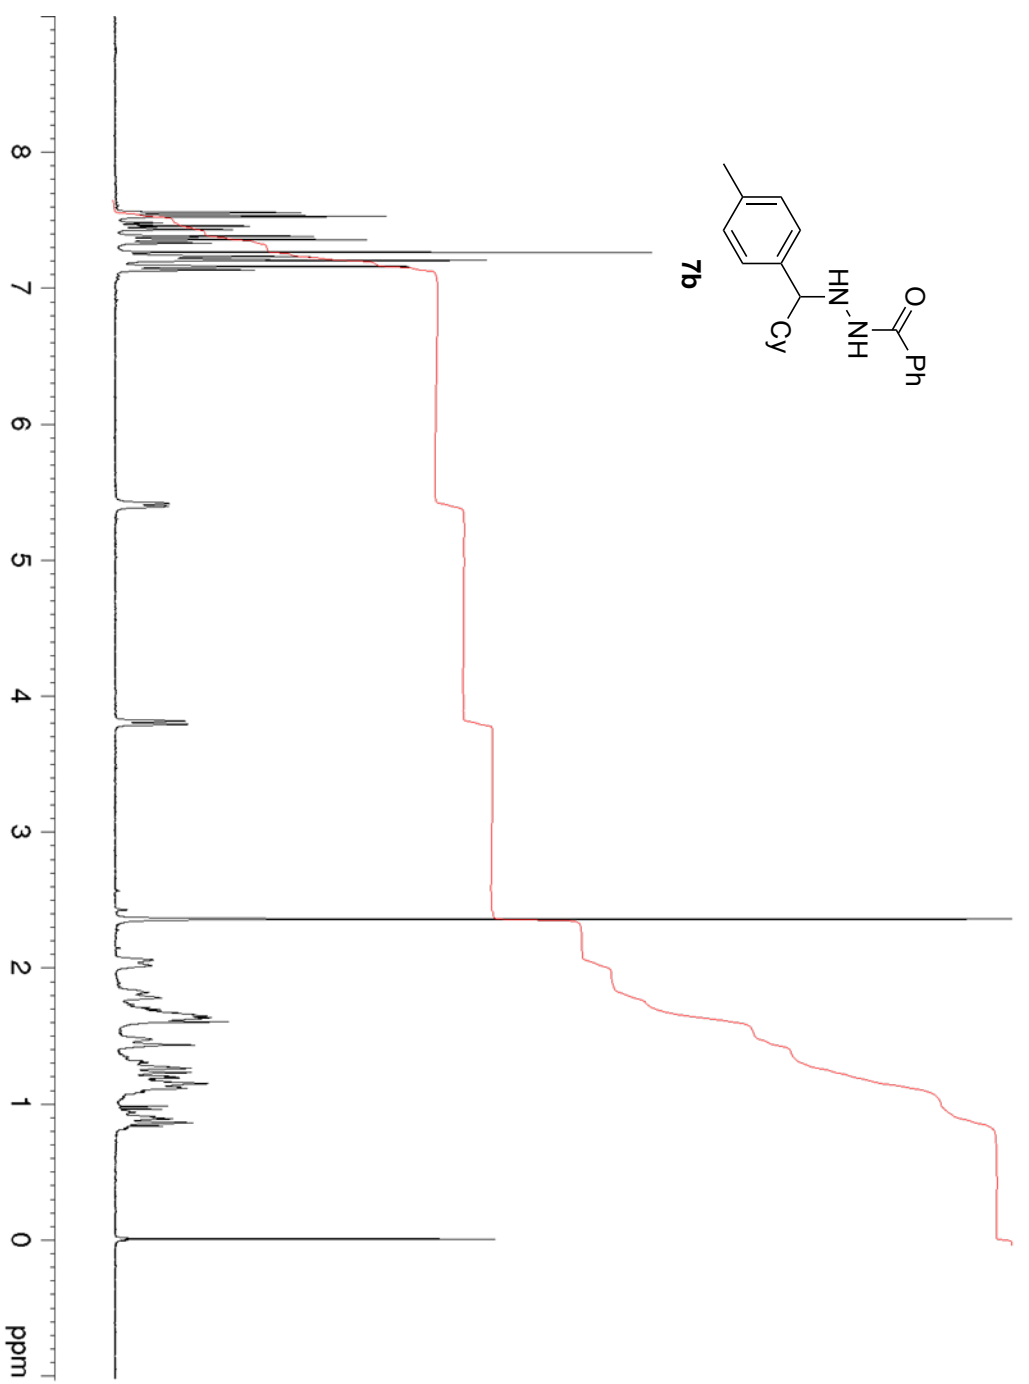

Current Data Parameters  
 NAME SC-03-137 1H  
 EXPNO 1  
 PROCNO 1

F2 - Acquisition Parameters  
 Date\_ 20190114  
 Time 15:39

INSTRUM FURIER300  
 PROBHD 5 mm DUL 13C-1  
 PULPROG zg30  
 TD 65536  
 SOLVENT CDC13  
 NS 8  
 DS 2

SWH 6103.516 Hz  
 FIDRES 0.093132 Hz  
 AQ 5.3687091 sec  
 RG 59 9049  
 DW 81.920 usec  
 DE 6.50 usec  
 TE 294.7 K  
 D1 1.00000000 sec  
 TD0 1

===== CHANNEL f1 =====  
 SFO1 300.1818537 MHz  
 NUC1 1H  
 P1 15.00 usec  
 PLW1 13.80399990 W

F2 - Processing parameters  
 SI 65536  
 SF 300.1800050 MHz  
 WDW EM  
 SSB 0  
 LB 0.30 Hz  
 GB 0  
 PC 1.00



166.9  
 138.0  
 137.1  
 133.1  
 131.8  
 129.1  
 128.7  
 128.5  
 126.9  
 77.6  
 76.7  
 70.4  
 42.4  
 30.2  
 29.5  
 26.5  
 26.3  
 21.3

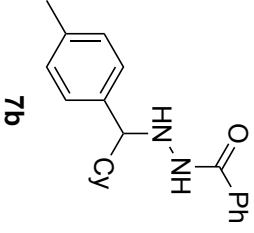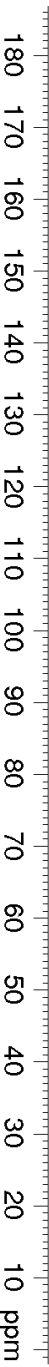

Current Data Parameters  
 NAME SC-03-137 13C  
 EXPNO 1  
 PROCNO 1

F2 - Acquisition Parameters  
 Date\_ 20190116

Time 7.43  
 INSTRUM FOUERIER300  
 PROBHD 5 mm DUL 13C-1  
 PULPROG ZPGP30  
 TD 65536  
 SOLVENT CDCl3  
 NS 1500  
 DS 4  
 SWH 24414.063 Hz  
 FIDRES 0.372929 Hz  
 AQ 1.3421773 sec  
 RG 501.187  
 DW 20.480 usec  
 DE 6.50 usec  
 TE 295.2 K  
 D1 2.00000000 sec  
 D11 0.03000000 sec  
 D31 0.00001500 sec  
 D40 0.030008300 sec  
 L4 40  
 L5 57  
 P32 90.00 usec  
 TD0 1

===== CHANNEL f1 =====  
 SFO1 75.4878687 MHz  
 NUC1 13C  
 P1 15.00 usec  
 PLW1 22.00000000 W

===== CHANNEL f2 =====  
 SFO2 300.1812007 MHz  
 NUC2 1H  
 CPDPRG2 waltz16  
 PCPD2 90.00 usec  
 PLW2 13.80399990 W  
 PLW12 0.38343999 W  
 PLW13 0.31059000 W

F2 - Processing parameters  
 SI 32768  
 SF 75.4803117 MHz  
 WDW EM  
 SSB 0  
 LB 1.00 Hz  
 GB 0  
 PC 1.40

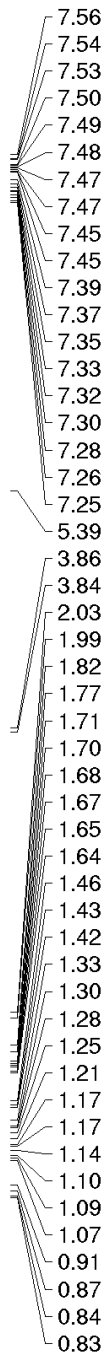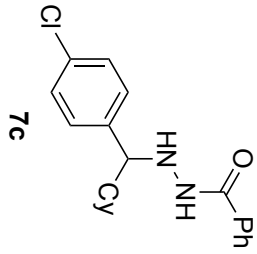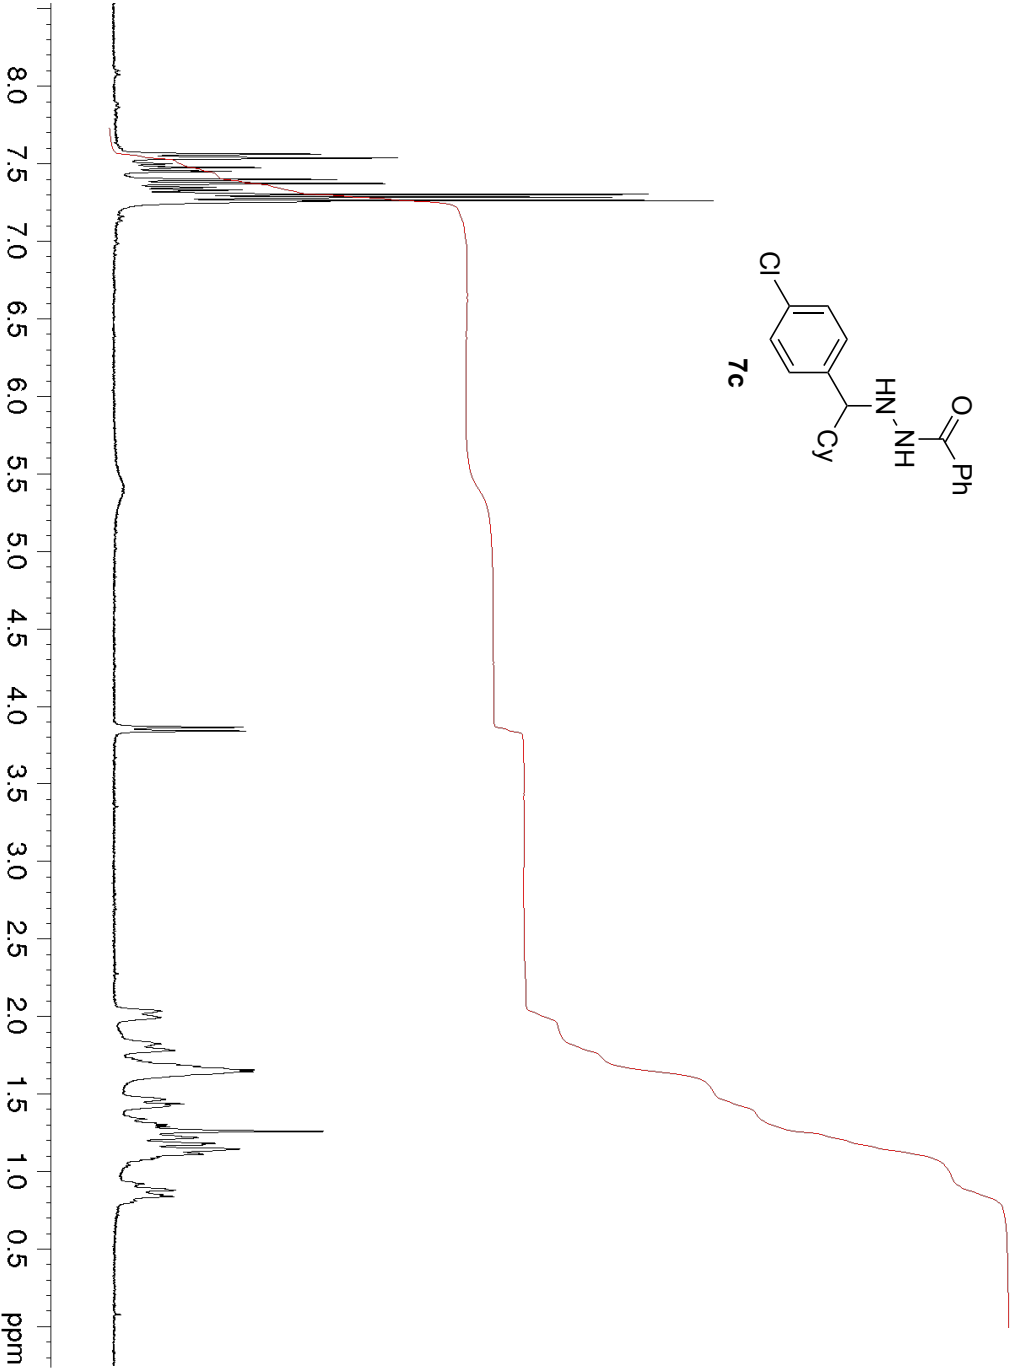

Current Data Parameters  
 NAME SC-03-141 1H h vac  
 EXPNO 1  
 PROCNO 1

F2 - Acquisition Parameters  
 Date\_ 20190315

Time 7.38  
 INSTRUM FOUERIER300  
 PROBHD 5 mm DUL 13C-1  
 PULPROG zg30  
 TD 65536  
 SOLVENT CDCl3  
 NS 8  
 DS 0  
 SMWH 6103.516 Hz  
 FIDRES 0.093132 Hz  
 AQ 5.3687091 sec  
 RG 75.2855  
 DW 81.920 usec  
 DE 6.50 usec  
 TE 294.3 K  
 D1 1.00000000 sec  
 TD0 1

===== CHANNEL f1 =====  
 SFO1 300.1818537 MHz  
 NUC1 1H  
 P1 15.00 usec  
 PLW1 13.80399990 W

F2 - Processing parameters  
 SI 65536  
 SF 300.1800050 MHz  
 WDW EM  
 SSB 0  
 LB 0.30 Hz  
 GB 0  
 PC 1.00

167.2  
 139.7  
 133.1  
 132.9  
 132.0  
 129.9  
 128.8  
 128.6  
 126.9  
 70.0  
 42.4  
 30.1  
 29.3  
 26.4  
 26.2

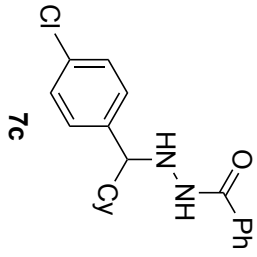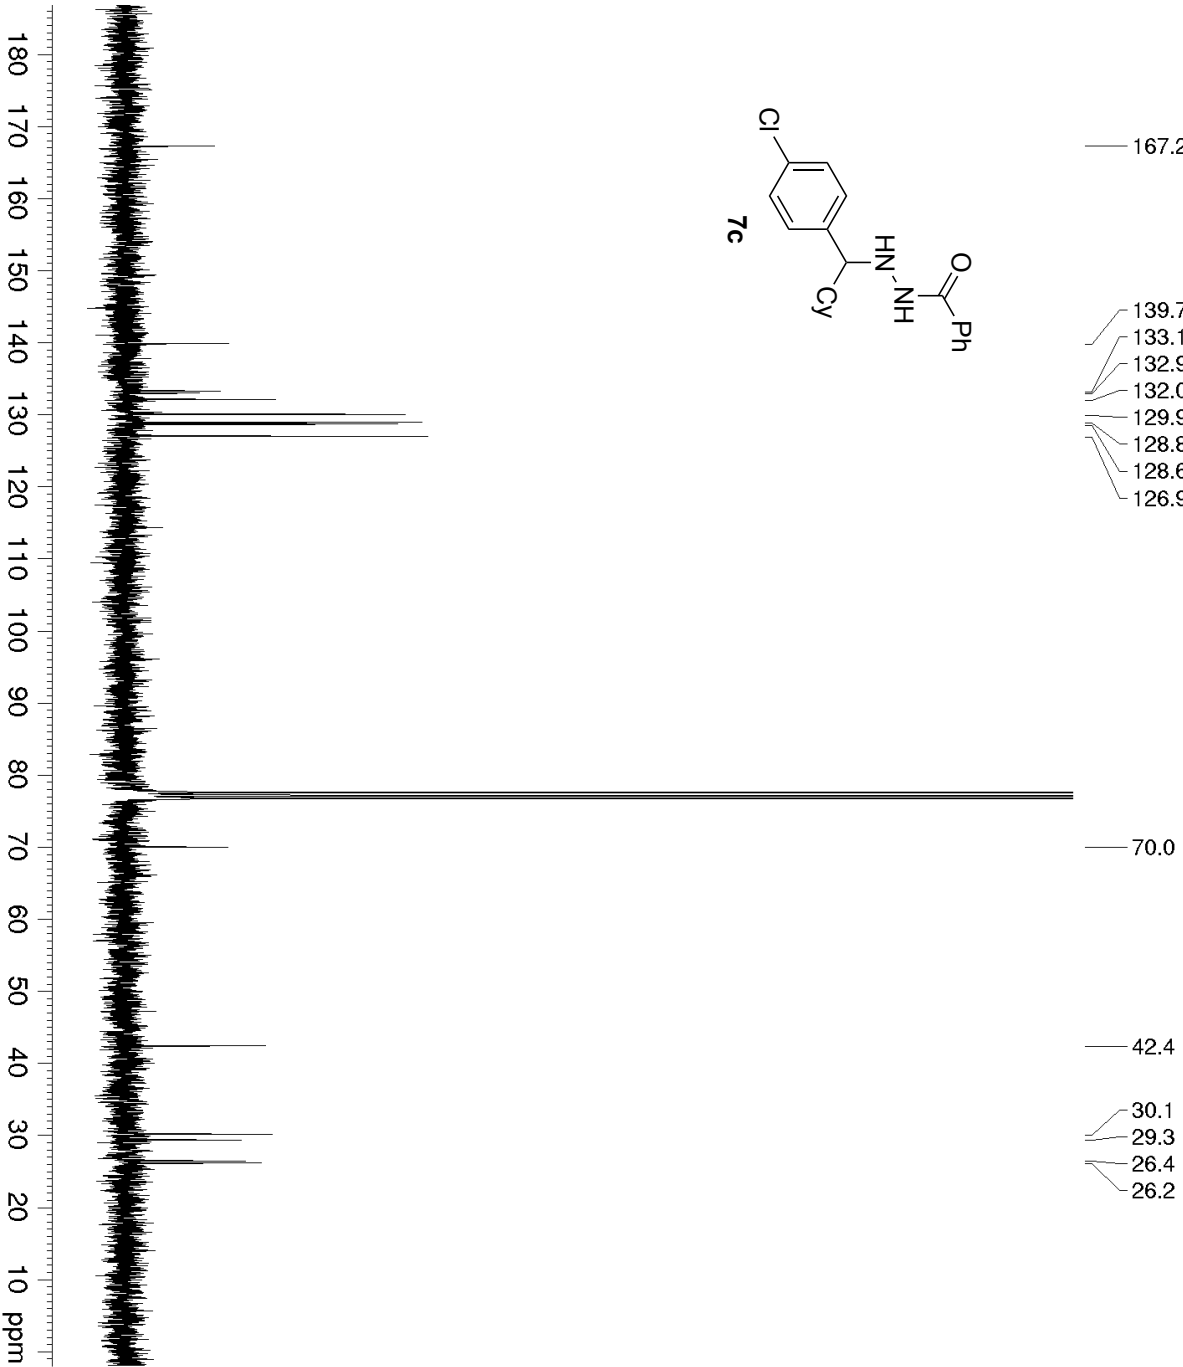

Current Data Parameters  
 NAME SC-03-141 13C conc  
 EXPNO 1  
 PROCNO 1

F2 - Acquisition Parameters  
 Date\_ 20190315  
 Time 8:02  
 INSTRUM FOUJRIER300  
 PROBHD 5 mm DUL 13C-1  
 PULPROG zgpg30  
 TD 65536  
 SOLVENT CDCl3  
 NS 850  
 DS 0  
 SWH 24414.063 Hz  
 FIDRES 0.372529 Hz  
 AQC 1.3421773 sec  
 RG 501.187  
 DW 20.480 usec  
 DE 6.50 usec  
 TE 294.3 K  
 D1 2.00000000 sec  
 D11 0.03000000 sec  
 D31 0.00001500 sec  
 D40 0.03008300 sec  
 L4 40  
 L5 57  
 P32 90.00 usec  
 TD0 1

===== CHANNEL f1 =====  
 SFO1 75.4878687 MHz  
 NUC1 13C  
 P1 15.00 usec  
 PLW1 22.00000000 W

===== CHANNEL f2 =====  
 SFO2 300.1812007 MHz  
 NUC2 1H  
 CPDPRG12 waltz16  
 PCPD2 90.00 usec  
 PLW2 13.80399990 W  
 PLW12 0.38343999 W  
 PLW13 0.31059000 W

F2 - Processing parameters  
 SI 32768  
 SF 75.4803116 MHz  
 WDW EM  
 SSB 0  
 LB 1.00 Hz  
 GB 0  
 PC 1.40

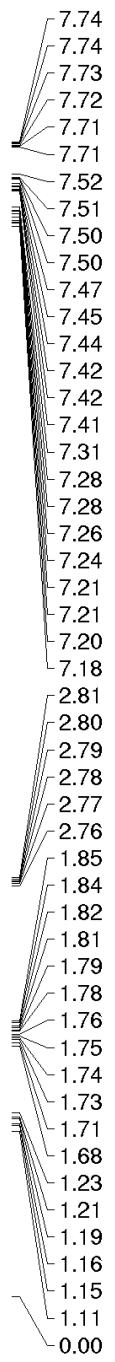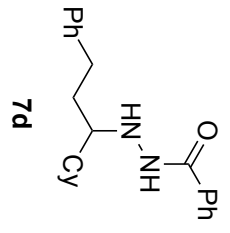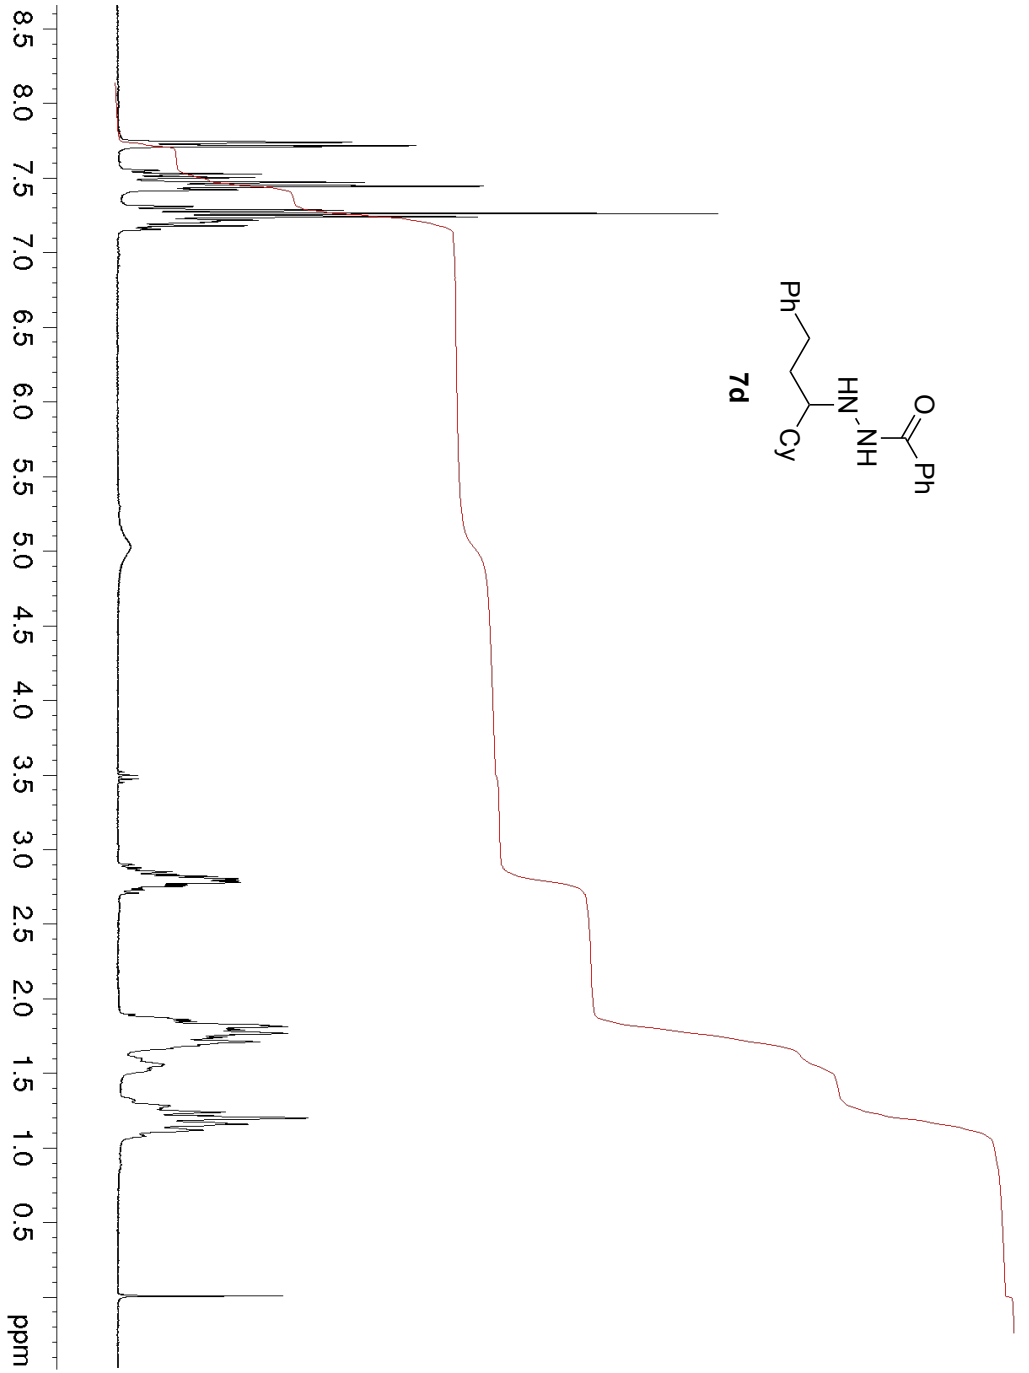

Current Data Parameters  
 NAME SC-03-112 1H pure  
 EXPNO 1  
 PROCNO 1

F2 - Acquisition Parameters  
 Date\_ 20181220  
 Time 10.43

INSTRUM FOUJIER300  
 PROBHD 5 mm DUL 13C-1  
 PULPROG zg30  
 TD 65536  
 SOLVENT CDCl3

NS 8  
 DS 2  
 SWH 6103.516 Hz  
 FIDRES 0.093132 Hz  
 AQ 5.3687091 sec  
 RG 49.2875  
 DW 81.920 usec  
 DE 6.50 usec  
 TE 294.9 K  
 D1 1.00000000 sec  
 TD0 1

==== CHANNEL f1 =====  
 SFO1 300.1818537 MHz  
 NUC1 1H  
 P1 15.00 usec  
 PLW1 13.80399990 W

F2 - Processing parameters  
 SI 65536  
 SF 300.1800049 MHz  
 WDW EM  
 SSB 0  
 LB 0.30 Hz  
 GB 0  
 PC 1.00

- 167.3
- 142.6
- 133.1
- 131.9
- 128.8
- 128.5
- 126.9
- 125.9
- 65.3
- 40.1
- 32.9
- 31.6
- 29.3
- 28.8
- 26.8
- 26.8

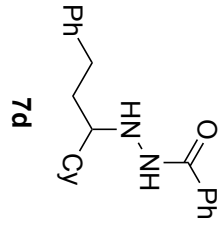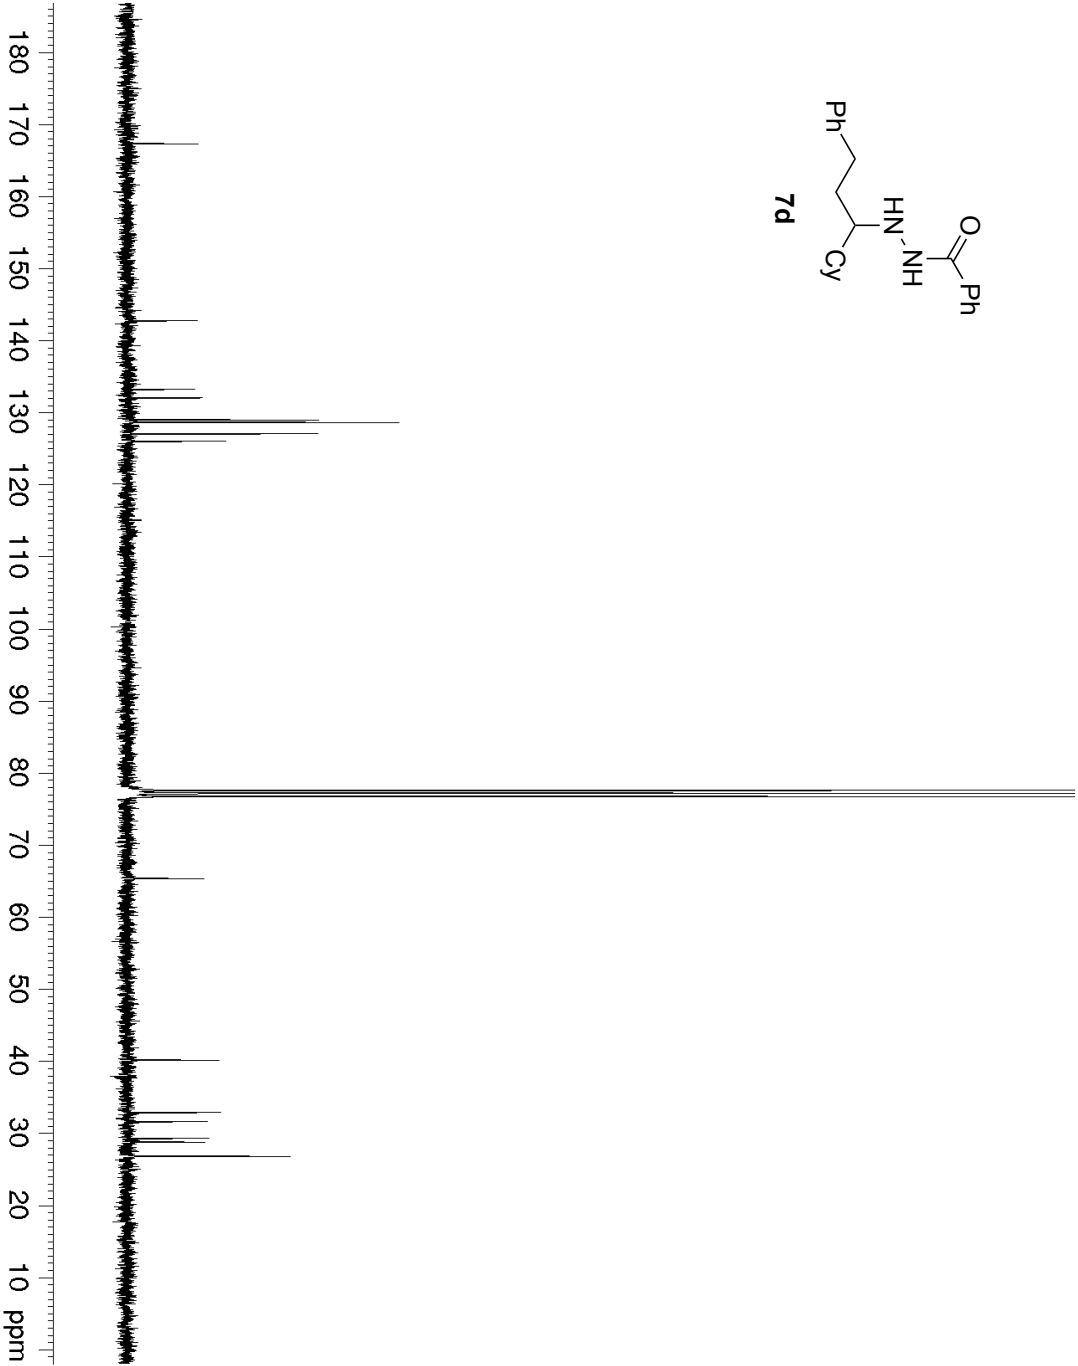

Current Data Parameters  
 NAME SC-03-112-13C  
 EXPNO 1  
 PROCNO 1

F2 - Acquisition Parameters  
 Date\_ 20181220  
 Time 10.49

INSTRUM FOUJIER300  
 PROBHD 5 mm DUL 13C-1  
 PULPROG zgpg30

TD 65536  
 SOLVENT CDC13

NS 700  
 DS 4

SWH 24414.063 Hz  
 FIDRES 0.372529 Hz

AQ 1.3421773 sec  
 RG 501.187

DW 20.480 usec  
 DE 6.50 usec

TE 295.0 K  
 D1 2.00000000 sec

D11 0.03000000 sec  
 D31 0.00001500 sec

D40 0.03008300 sec  
 L4 40

L5 57  
 P32 90.00 usec

TDO 1

===== CHANNEL f1 =====  
 SFO1 75.4878687 MHz  
 NUC1 13C

P1 15.00 usec  
 PLW1 22.00000000 W

===== CHANNEL 12 =====  
 SFO2 300.1812007 MHz

NUC2 1H  
 CPDPRG12 waltz16

PCPD2 90.00 usec  
 PLW2 13.80399990 W

PLW12 0.38343999 W  
 PLW13 0.31059000 W

F2 - Processing parameters  
 SI 32768  
 SF 75.4803116 MHz

WDW EM  
 SSB 0

LB 1.00 Hz  
 GB 0

PC 1.40

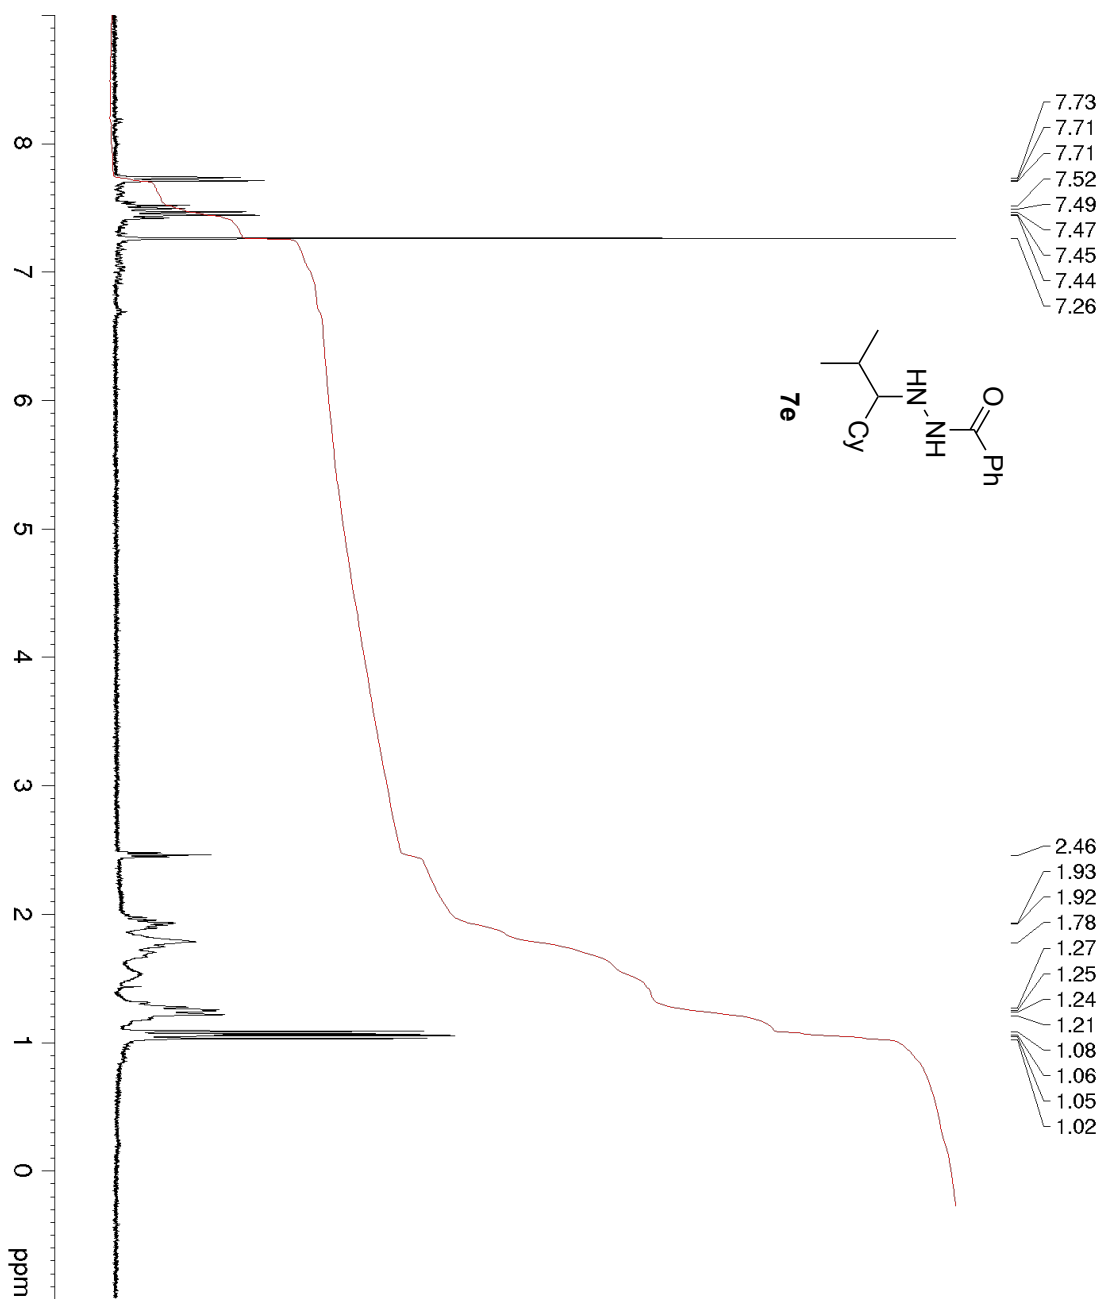

7.73  
7.71  
7.71  
7.52  
7.49  
7.47  
7.45  
7.44  
7.26

2.46  
1.93  
1.92  
1.78  
1.27  
1.25  
1.24  
1.21  
1.08  
1.06  
1.05  
1.02

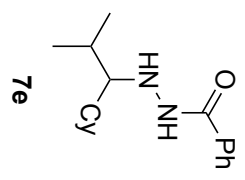

Current Data Parameters  
 NAME SC-03-219 1H column  
 EXPNO 1  
 PROCNO 1

F2 - Acquisition Parameters  
 Date\_ 20190801  
 Time 15.03

INSTRUM FURIER300  
 PROBHD 5 mm DUL 13C-1  
 PULPROG zg30

TD 65536  
 SOLVENT CDCl3  
 NS 8

DS 0  
 SWH 6103.516 Hz  
 FIDRES 0.093132 Hz

RG 172.312  
 DW 81.920 usec  
 DE 6.50 usec  
 TE 294.5 K  
 D1 0.10000000 sec  
 TDO 1

==== CHANNEL f1 =====  
 SFO1 300.1818537 MHz  
 NUC1 1H  
 P1 15.00 usec  
 PLW1 13.80399990 W

F2 - Processing parameters  
 SI 65536  
 SF 300.1800054 MHz  
 WDWW EM  
 SSB 0  
 LB 0.30 Hz  
 GB 0  
 PC 1.00

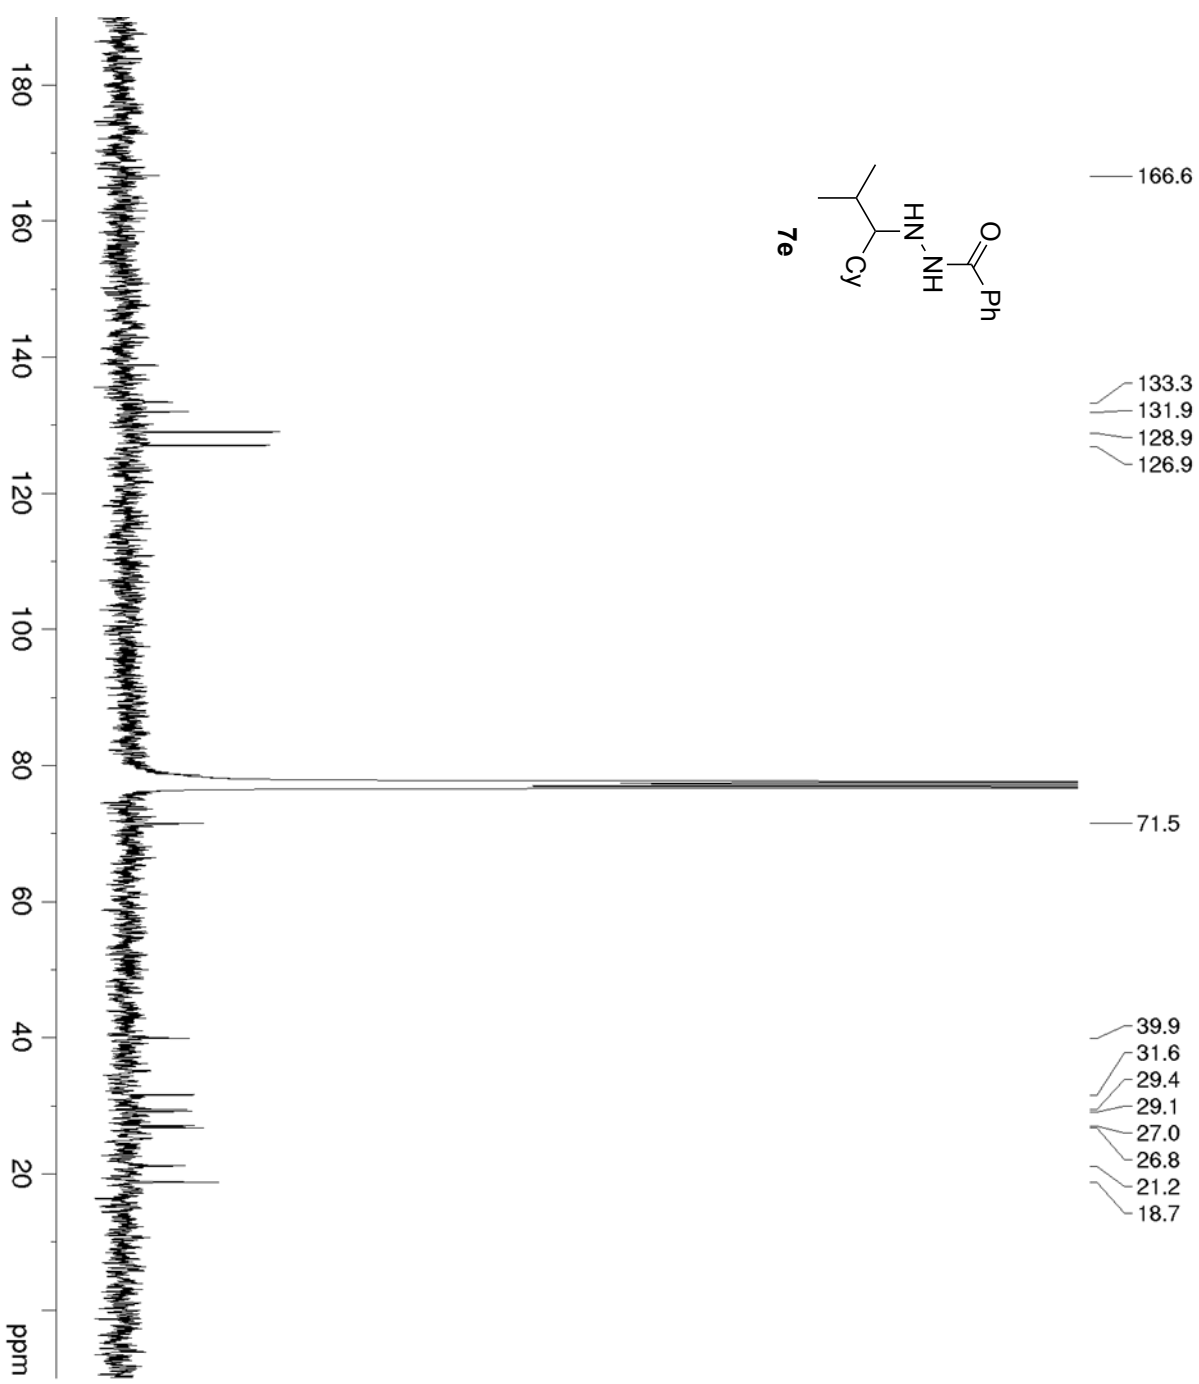

166.6  
 133.3  
 131.9  
 128.9  
 126.9  
 71.5  
 39.9  
 31.6  
 29.4  
 29.1  
 27.0  
 26.8  
 21.2  
 18.7

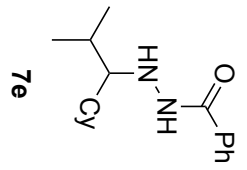

Current Data Parameters  
 NAME SC-03-219 13C cool  
 EXPNO 2  
 PROCNO 1

F2 - Acquisition Parameters  
 Date\_ 20190802  
 Time 6.23

INSTRUM spect  
 PROBHD 5 mm QNP 1H/13  
 PULPROG zgpg30  
 TD 65536  
 SOLVENT CDC13  
 NS 7500  
 DS 16  
 SWH 19960.080 Hz  
 FIDRES 0.304567 Hz  
 AQ 1.6416768 sec  
 RG 8192  
 DW 25.050 usec  
 DE 6.50 usec  
 TE 300.0 K  
 D1 3.00000000 sec  
 d11 0.03000000 sec  
 TD0 1

==== CHANNEL f1 =====  
 NUC1 13C  
 P1 9.50 usec  
 PL1 0 dB  
 SFO1 75.4803253 MHz

==== CHANNEL f2 =====  
 CPDPRG2 waltz16  
 NUC2 1H  
 PCPD2 87.00 usec  
 PL2 0 dB  
 PL12 20.00 dB  
 SFO2 300.1512006 MHz

F2 - Processing parameters  
 SI 32768  
 SF 75.4727651 MHz  
 WDW EM  
 SSB 0  
 LB 3.50 Hz  
 GB 0  
 PC 1.40

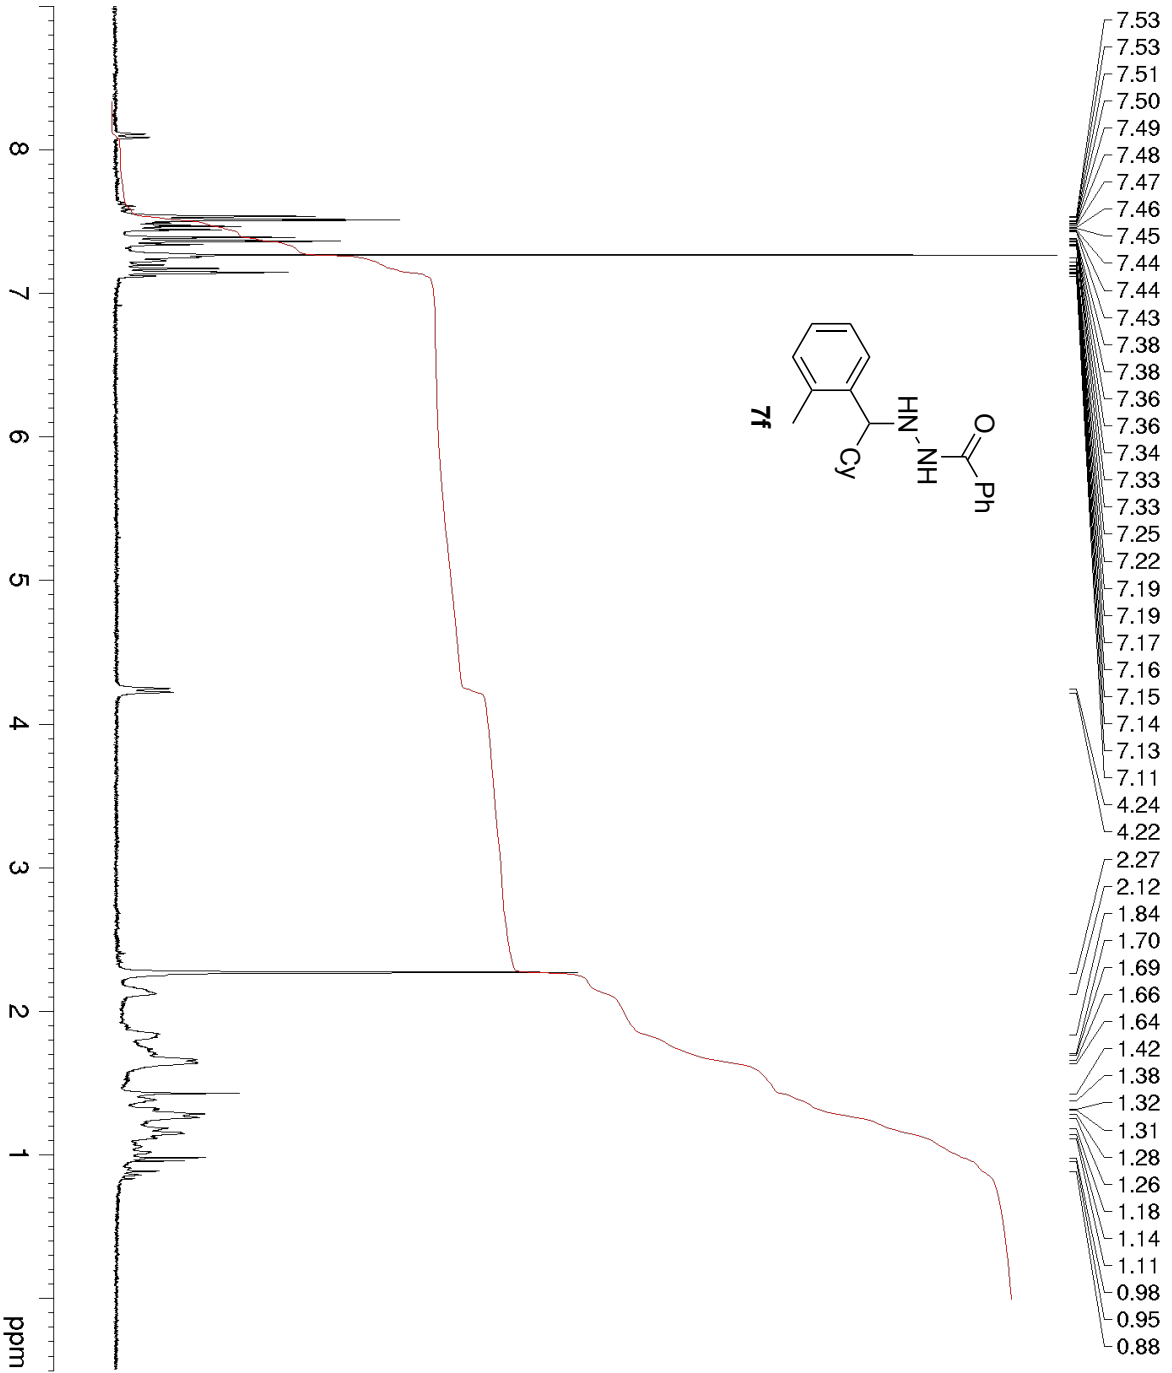

Current Data Parameters  
 NAME SC-03-187 repur  
 EXPNO 1  
 PROCNO 1

F2 - Acquisition Parameters  
 Date\_ 20190424  
 Time 11:35

INSTRUM FURIER300  
 PROBHD 5 mm DUL 13C-1  
 PULPROG zg30

TD 65536  
 SOLVENT CDC13  
 NS 8  
 DS 0

SWH 6103.516 Hz  
 FIDRES 0.093132 Hz  
 AQC 5.3687091 sec

RG 125.468  
 DW 81.920 usec  
 DE 6.50 usec  
 TE 294.2 K  
 D1 1.00000000 sec  
 TD0 1

==== CHANNEL f1 =====  
 SFO1 300.1818537 MHz  
 NUC1 1H  
 P1 15.00 usec  
 PLW1 13.80399990 W

F2 - Processing parameters  
 SI 65536  
 SF 300.1800050 MHz  
 WDW EM  
 SSB 0  
 LB 0.30 Hz  
 GB 0  
 PC 1.00



- 167.0
- 139.6
- 137.4
- 133.0
- 131.7
- 130.3
- 128.6
- 126.8
- 126.7
- 126.2
- 29.8
- 29.5
- 26.4
- 26.3
- 26.1
- 19.9

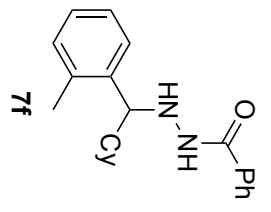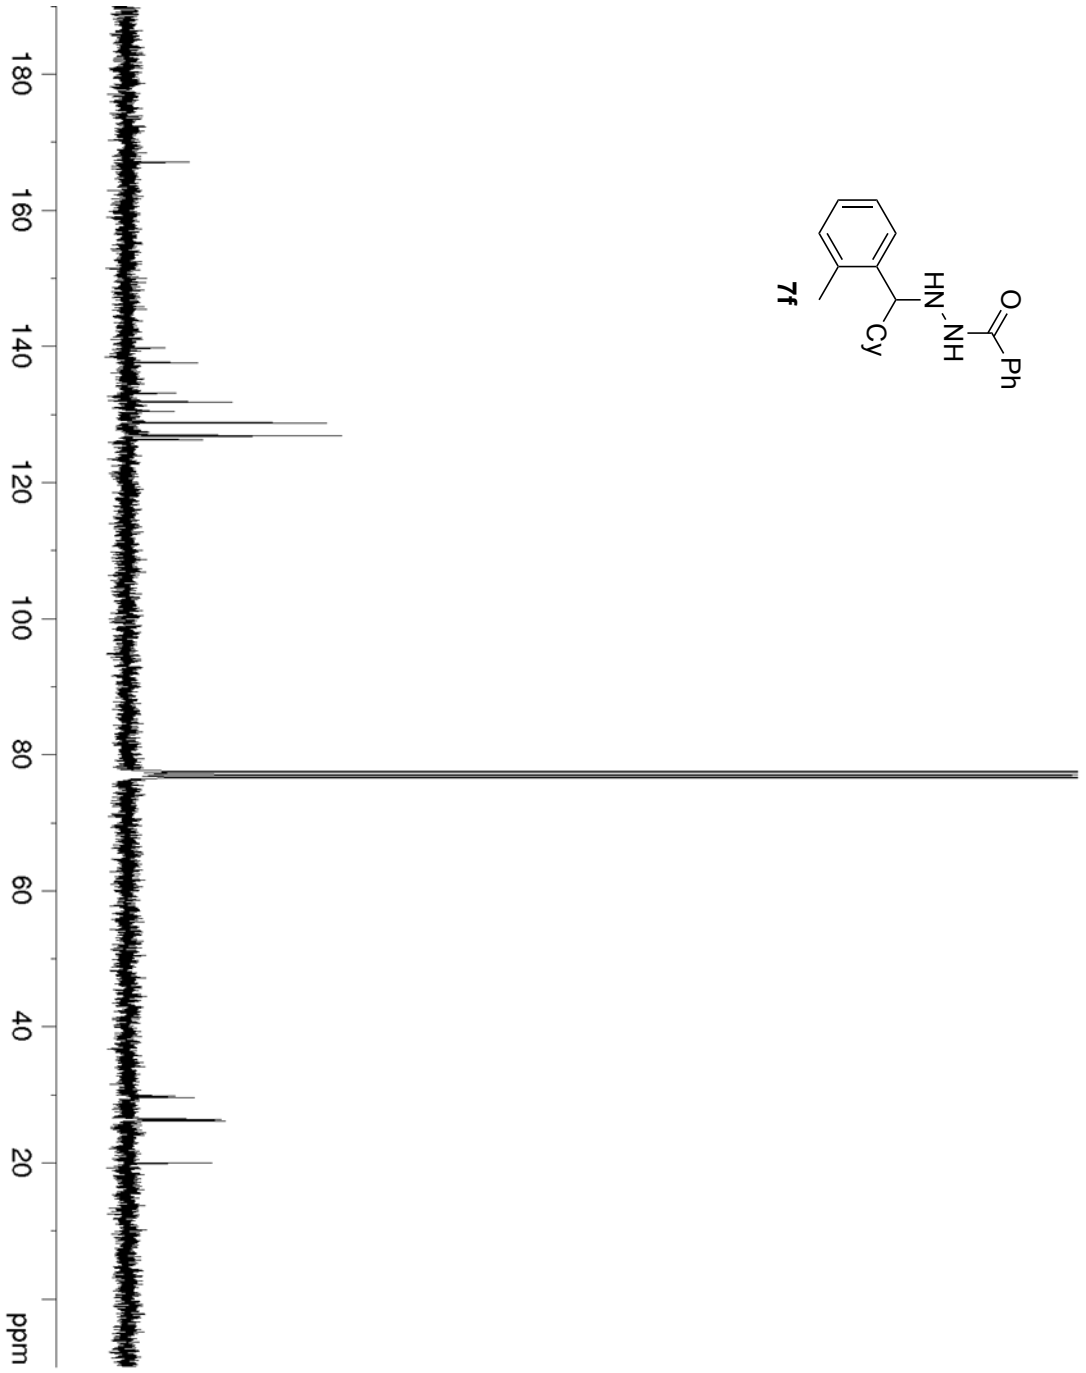

Current Data Parameters  
 NAME SC-03-214.13C  
 EXPNO 1  
 PROCNO 1

F2 - Acquisition Parameters  
 Date\_ 20190611  
 Time 15.10

INSTRUM FOUJIER300  
 PROBHD 5 mm DUL 13C-1  
 PULPROG zgpg30  
 TD 65536  
 SOLVENT CDC13  
 NS 1024

DS 4  
 SWH 24414.063 Hz  
 FIDRES 0.372529 Hz  
 AQ 1.3421773 sec  
 RG 501.187  
 DW 20.480 usec  
 DE 6.50 usec  
 TE 294.5 K

D1 2.00000000 sec  
 D11 0.03000000 sec  
 D31 0.00001500 sec  
 D40 0.03008300 sec  
 L4 40  
 L5 57  
 P32 90.00 usec  
 TD0 1

===== CHANNEL f1 =====  
 SFO1 75.4878687 MHz  
 NUC1 13C  
 P1 15.00 usec  
 PLW1 22.00000000 W

===== CHANNEL f2 =====  
 SFO2 300.1812007 MHz  
 NUC2 1H  
 CPDPRG2 waltz16  
 PCPD2 90.00 usec  
 PLW2 13.80399990 W  
 PLW12 0.38343999 W  
 PLW13 0.31059000 W

F2 - Processing parameters  
 SI 32768  
 SF 75.4803210 MHz  
 WDW EM  
 SSB 0  
 LB 1.00 Hz  
 GB 0  
 PC 1.40

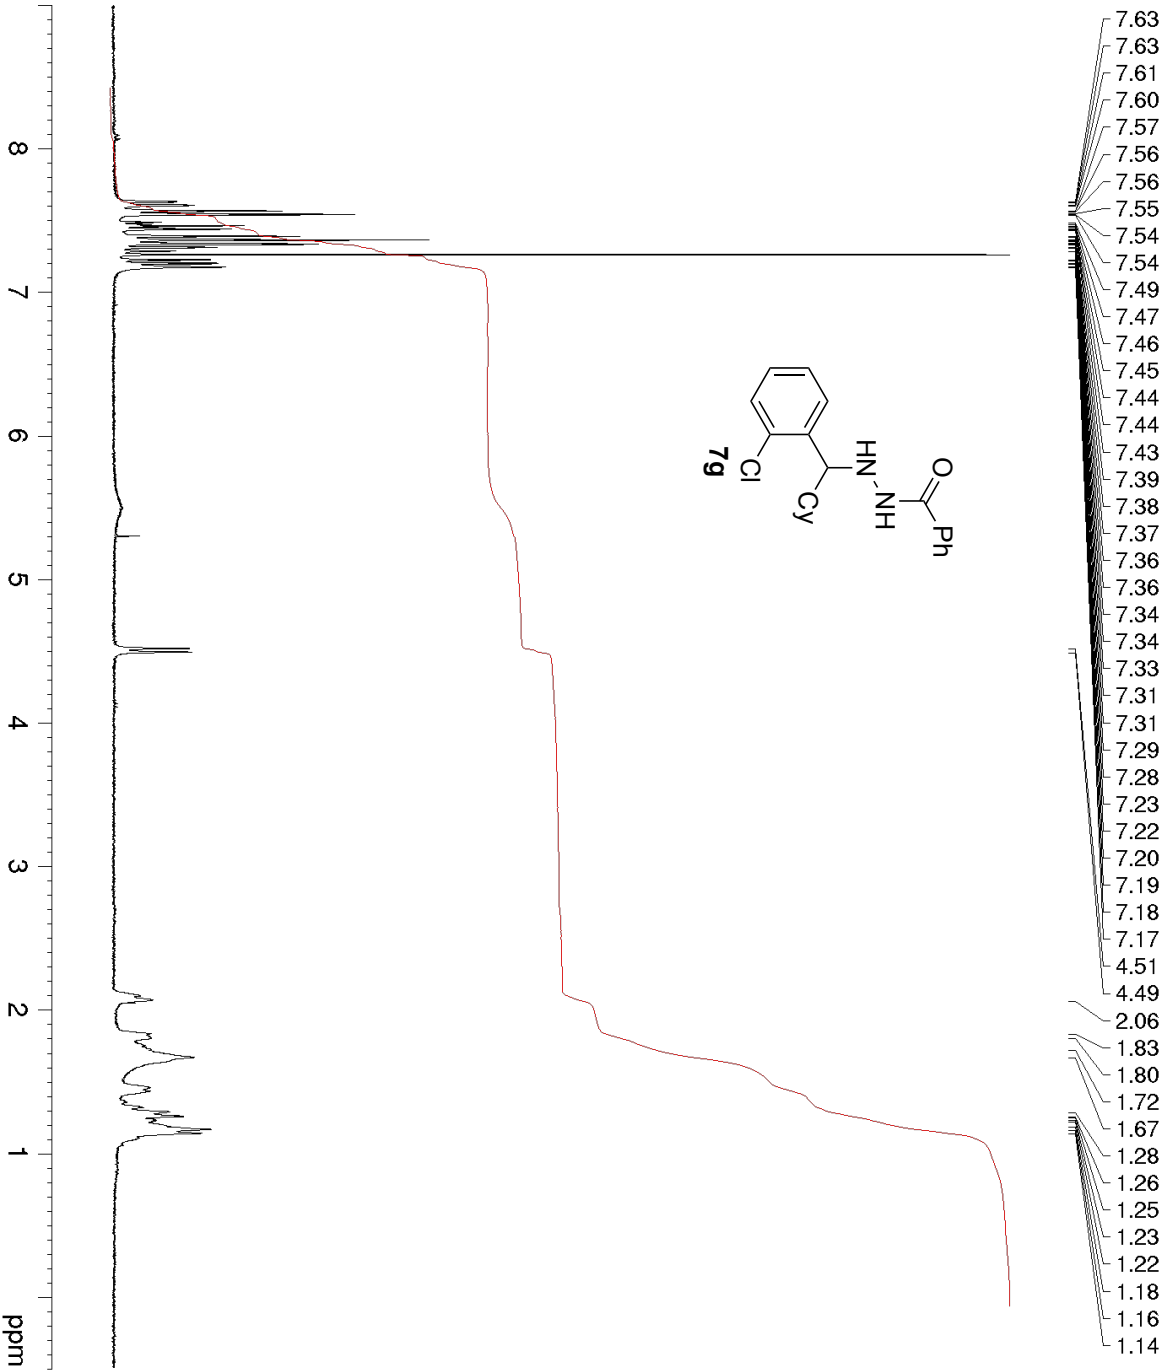

7.63  
7.63  
7.61  
7.60  
7.57  
7.56  
7.56  
7.55  
7.54  
7.54  
7.49  
7.47  
7.46  
7.45  
7.44  
7.44  
7.43  
7.39  
7.38  
7.37  
7.36  
7.36  
7.34  
7.34  
7.33  
7.31  
7.31  
7.29  
7.28  
7.23  
7.22  
7.20  
7.19  
7.18  
7.17  
4.51  
4.49  
2.06  
1.83  
1.80  
1.72  
1.67  
1.28  
1.26  
1.25  
1.23  
1.22  
1.18  
1.16  
1.14

Current Data Parameters  
 NAME SC-03-192 1H  
 EXPNO 1  
 PROCNO 1

F2 - Acquisition Parameters  
 Date\_ 20190424  
 Time\_ 11:30

INSTRUM FOUJIER300  
 PROBHD 5 mm DUL 13C-1  
 PULPROG zg30  
 TD 65536  
 SOLVENT CDC13  
 NS 8  
 DS 0  
 SWH 6103.516 Hz  
 FIDRES 0.093132 Hz  
 AQ 5.3687091 sec  
 RG 111.9  
 DW 81.920 usec  
 DE 6.50 usec  
 TE 294.1 K  
 D1 1.00000000 sec  
 TD0 1

===== CHANNEL f1 =====  
 SFO1 300.1818537 MHz  
 NUC1 1H  
 P1 15.00 usec  
 PLW1 13.80399990 W

F2 - Processing parameters  
 SI 65536  
 SF 300.1800051 MHz  
 WDW EM  
 SSB 0  
 LB 0.30 Hz  
 GB 0  
 PC 1.00

- 167.1
- 139.0
- 135.2
- 133.0
- 131.7
- 129.5
- 129.0
- 128.6
- 128.2
- 126.9
- 126.8
- 65.7
- 42.2
- 29.4
- 26.3
- 26.2
- 26.1

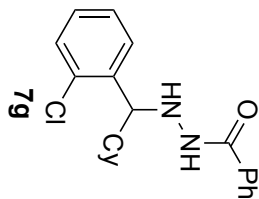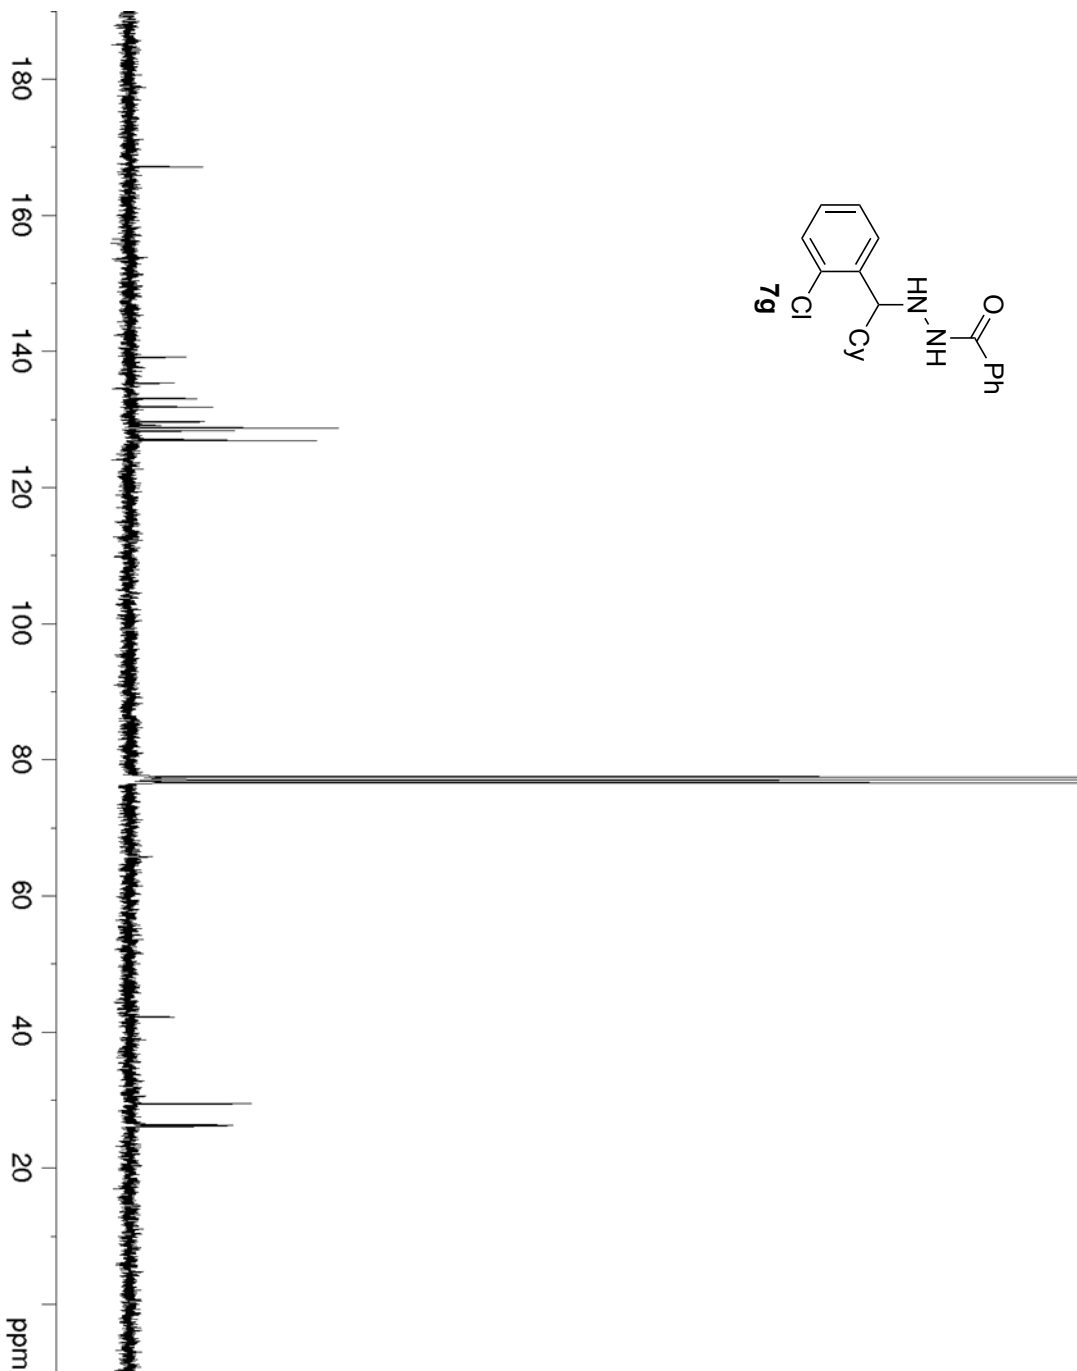

Current Data Parameters  
 NAME SC-03-192 13C  
 EXPNO 1  
 PROCNO 1

F2 - Acquisition Parameters  
 Date\_ 20190422

Time 9.48  
 INSTRUM FOUJIER300  
 PROBHD 5 mm DUL 13C-1  
 PULPROG zgpg30  
 TD 65536  
 SOLVENT CDC13  
 NS 800

DS 0  
 SWH 24414.063 Hz  
 FIDRES 0.372529 Hz  
 AQ 1.3421773 sec  
 RG 501.187  
 DW 20.480 usec  
 DE 6.50 usec  
 TE 294.2 K

D1 2.00000000 sec  
 D11 0.03000000 sec  
 D31 0.00001500 sec  
 D40 0.03008300 sec  
 L4 40  
 L5 57  
 P32 90.00 usec  
 TDO 1

===== CHANNEL f1 =====  
 SFO1 75.4878687 MHz  
 NUC1 13C  
 P1 15.00 usec  
 PLW1 22.00000000 W

===== CHANNEL f2 =====  
 SFO2 300.1812007 MHz  
 NUC2 1H  
 CPDPRG2 waltz16  
 PCPD2 90.00 usec  
 PLW2 13.80399990 W  
 PLW12 0.38343999 W  
 PLW13 0.31059000 W

F2 - Processing parameters  
 SI 32768  
 SF 75.4803210 MHz  
 WDW EM  
 SSB 0  
 LB 1.00 Hz  
 GB 0  
 PC 1.40

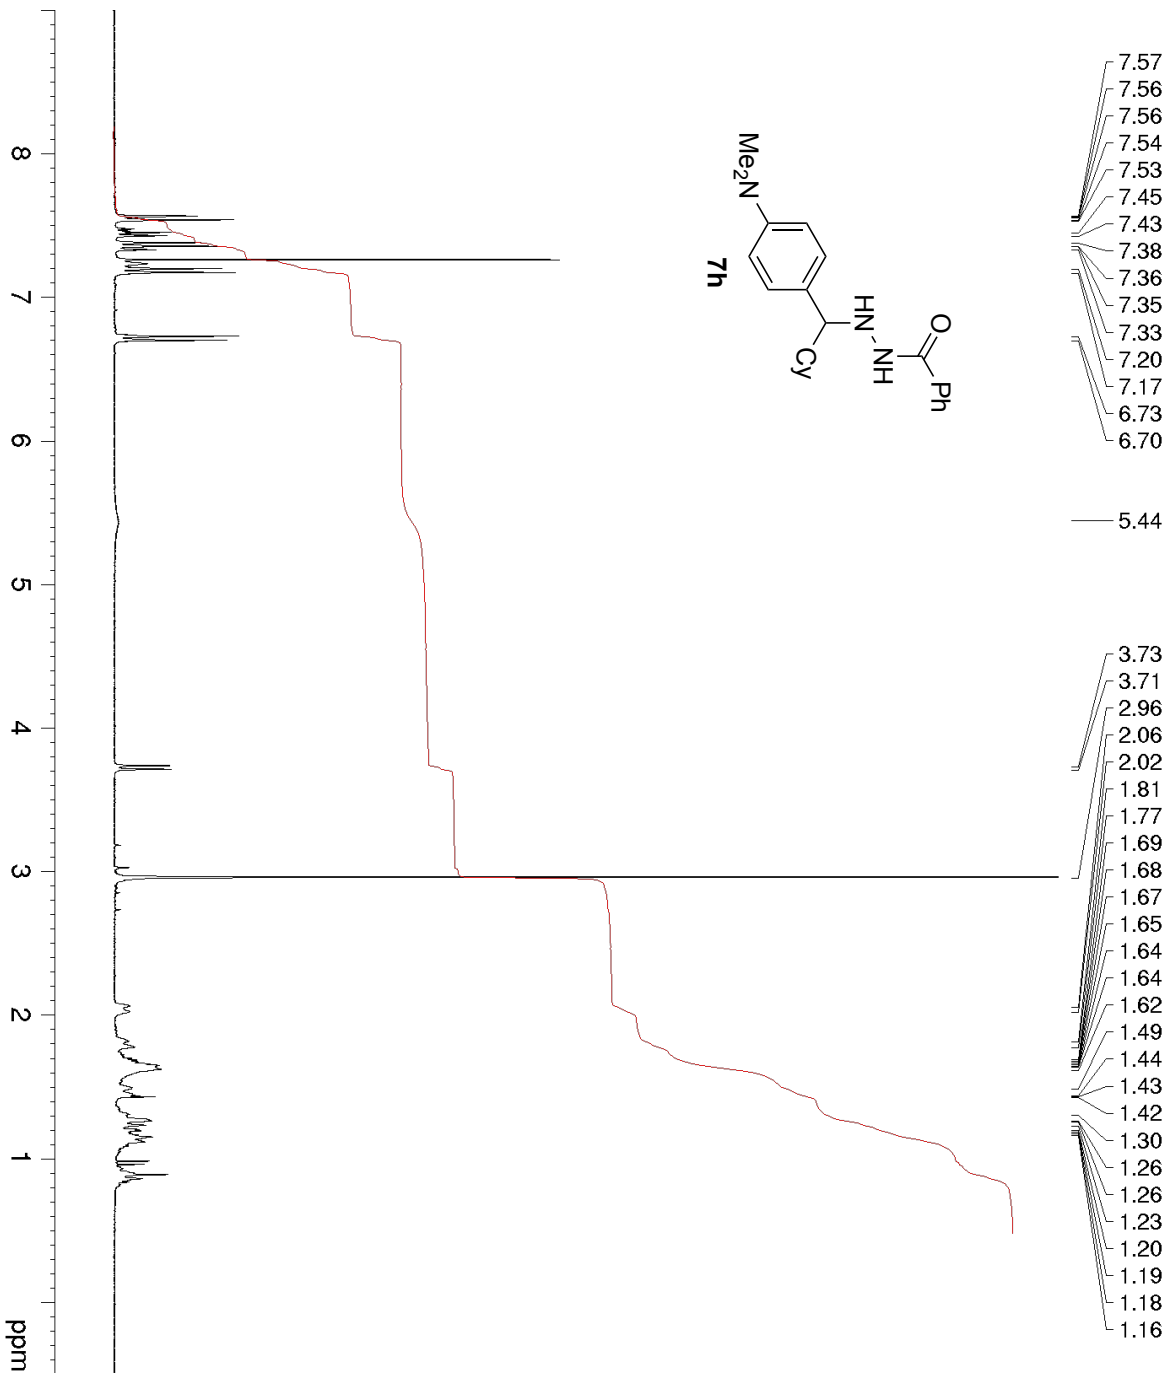

Current Data Parameters  
 NAME SC-03-188.d11.1H  
 EXPNO 1  
 PROCNO 1

F2 - Acquisition Parameters  
 Date\_ 20190422  
 Time 9.38

INSTRUM FOUJIER300  
 PROBHD 5 mm DUL.13C-1  
 PULPROG zg30  
 TD 65536  
 SOLVENT CDC13  
 NS 8  
 DS 0  
 SWH 6103.516 Hz  
 FIDRES 0.093132 Hz  
 AQ 5.3687091 sec  
 RG 92.2176  
 DW 81.920 usec  
 DE 6.50 usec  
 TE 294.2 K  
 D1 1.00000000 sec  
 TD0 1

===== CHANNEL f1 =====  
 SFO1 300.1818537 MHz  
 NUC1 1H  
 P1 15.00 usec  
 PLW1 13.80399990 W

F2 - Processing parameters  
 SI 65536  
 SF 300.1800051 MHz  
 WDW EM  
 SSB 0  
 LB 0.30 Hz  
 GB 0  
 PC 1.00

Current Data Parameters  
 NAME SC-03-188 13C  
 EXPNO 1  
 PROCNO 1

F2 - Acquisition Parameters  
 Date\_ 20190421  
 Time 12:11

INSTRUM FOUJIER300  
 PROBHD 5 mm DUL 13C-1  
 PULPROG zgpg30  
 TD 65536  
 SOLVENT CDC13  
 NS 800

DS 0  
 SWH 24414.063 Hz  
 FIDRES 0.372529 Hz  
 AQC 1.3421773 sec  
 RG 501.187  
 DW 20.480 usec  
 DE 6.50 usec  
 TE 294.4 K

D1 2.00000000 sec  
 D11 0.03000000 sec  
 D31 0.00001500 sec  
 D40 0.03008300 sec  
 L4 40  
 L5 57  
 P32 90.00 usec  
 TDO 1

==== CHANNEL f1 =====  
 SFO1 75.4878687 MHz  
 NUC1 13C  
 P1 15.00 usec  
 PLW1 22.00000000 W

==== CHANNEL f2 =====  
 SFO2 300.1812007 MHz  
 NUC2 1H  
 CPDPRG2 waltz16  
 PCPD2 90.00 usec  
 PLW2 13.80399990 W  
 PLW12 0.38343999 W  
 PLW13 0.31059000 W

F2 - Processing parameters  
 SI 32768  
 SF 75.4803118 MHz  
 WDW EM  
 SSB 0  
 LB 1.00 Hz  
 GB 0  
 PC 1.40

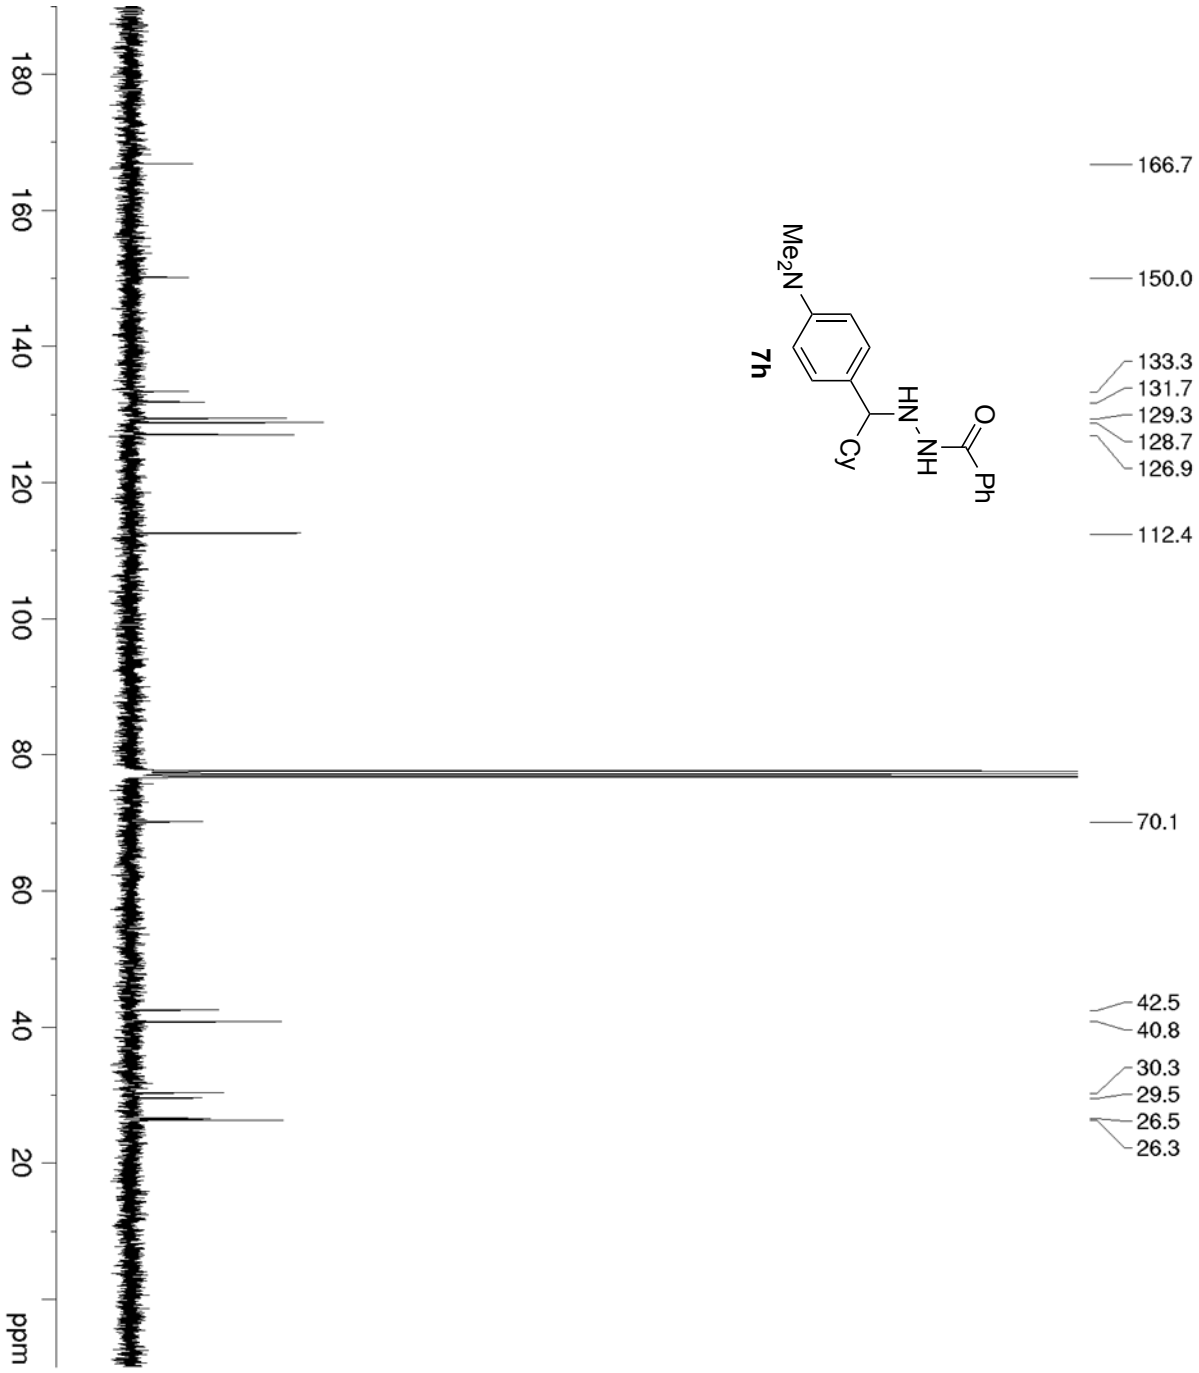

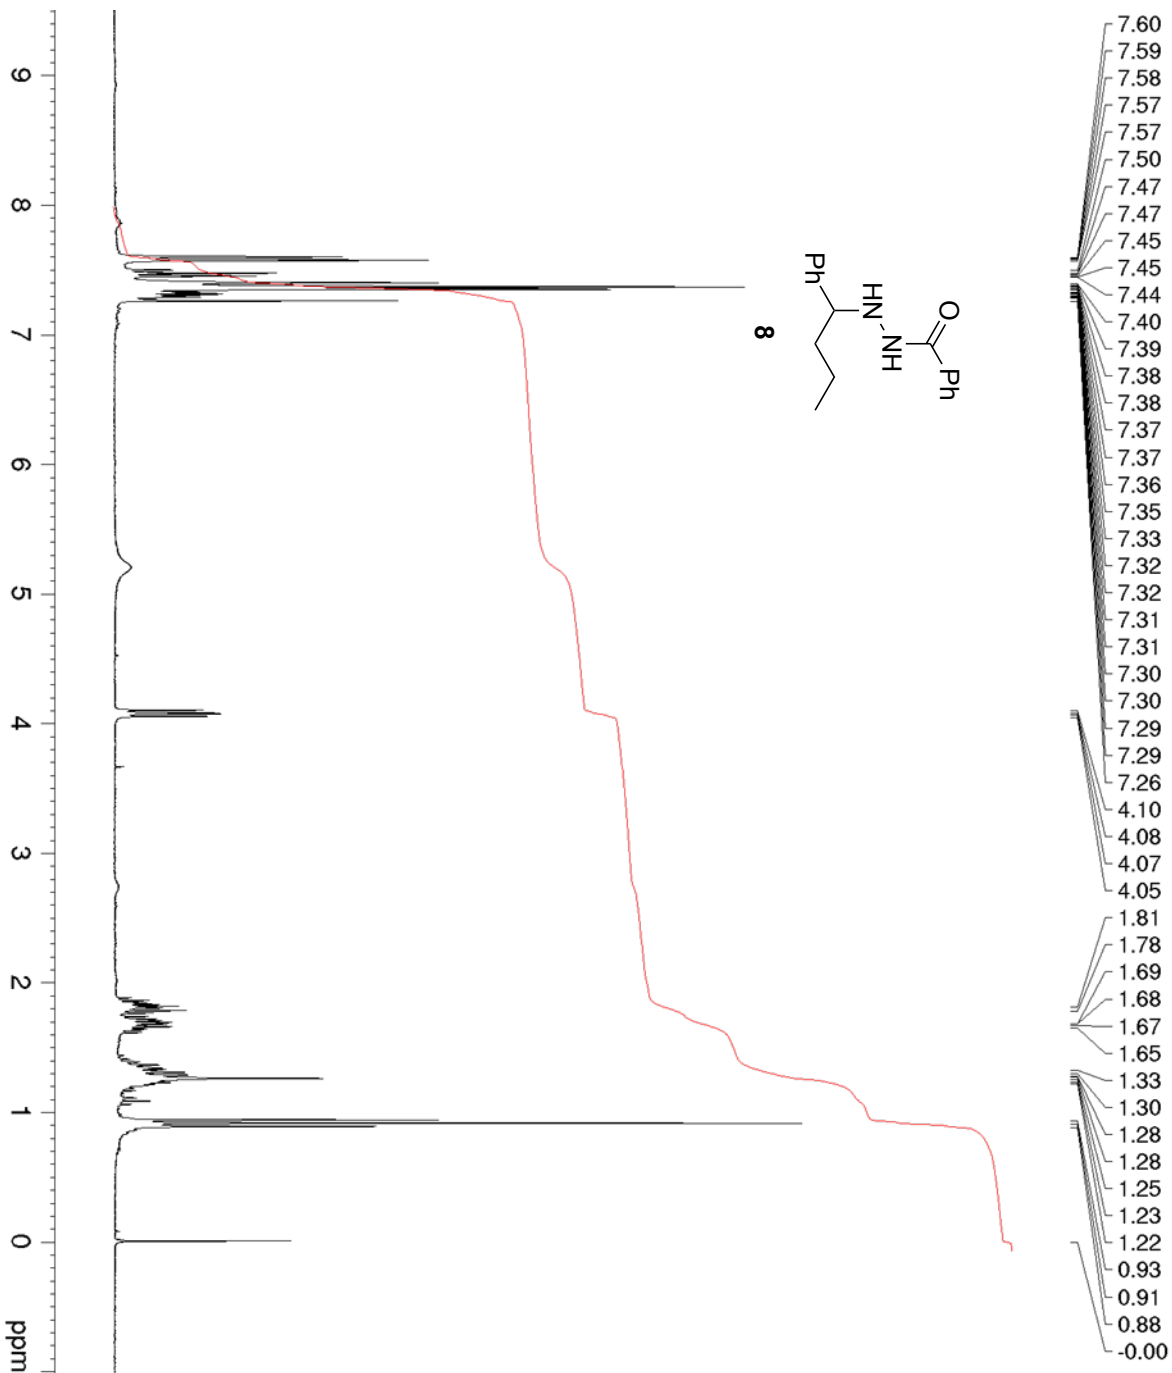

7.60  
7.59  
7.58  
7.57  
7.57  
7.50  
7.47  
7.47  
7.45  
7.45  
7.44  
7.40  
7.39  
7.38  
7.38  
7.37  
7.37  
7.36  
7.35  
7.33  
7.32  
7.32  
7.31  
7.31  
7.30  
7.30  
7.29  
7.29  
7.26  
4.10  
4.08  
4.07  
4.05  
1.81  
1.78  
1.69  
1.68  
1.67  
1.65  
1.33  
1.30  
1.28  
1.28  
1.25  
1.23  
1.22  
0.93  
0.91  
0.88  
-0.00

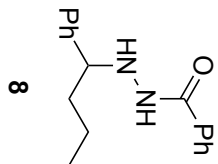

```

Current Data Parameters
NAME      SC-03-098 1H
EXPNO    1
PROCNO   1

F2 - Acquisition Parameters
Date_    20181127
Time     14.52
INSTRUM  FOURIER300
PROBHD   5 mm DUL 13C-1
PULPROG  zg30
TD        65536
SOLVENT  CDCl3
NS        8
DS        2
SWH       6103.516 Hz
FIDRES   0.093132 Hz
AQ        5.3687091 sec
RG        32
DW        81.920 usec
DE        6.50 usec
TE        294.0 K
D1        1.00000000 sec
TD0       1

===== CHANNEL f1 =====
SFO1     300.1818537 MHz
NUC1     1H
P1       15.00 usec
PLW1     13.80399990 W

F2 - Processing parameters
SI       65536
SF       300.1800051 MHz
WDW      EM
SSB      0
LB       0.30 Hz
GB       0
PC       1.00
  
```

167.3  
142.2  
133.0  
131.9  
128.8  
128.7  
128.0  
127.7  
126.9

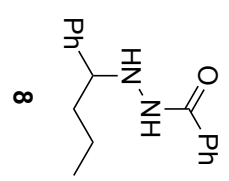

65.3  
37.6  
19.4  
14.2

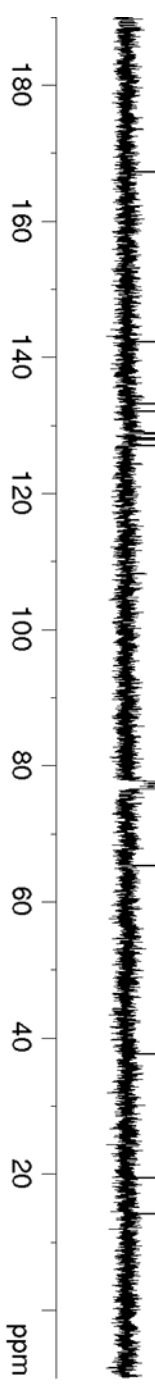

Current Data Parameters  
NAME SC-03-098 13C  
EXPNO 1  
PROCNO 1

F2 - Acquisition Parameters  
Date\_ 20190314  
Time 18:07  
INSTRUM FOUJIER300  
PROBHD 5 mm DUL 13C-1  
PULPROG zgpg30  
TD 65536  
SOLVENT CDC13  
NS 841  
DS 0  
SWH 24414.063 Hz  
FIDRES 0.372529 Hz  
AQ 1.3421773 sec  
RG 501.187  
DW 20.480 usec  
DE 6.50 usec  
TE 294.0 K  
D1 2.00000000 sec  
D11 0.03000000 sec  
D31 0.00001500 sec  
D40 0.03008300 sec  
L4 40  
L5 57  
P32 90.00 usec  
TDO 1

===== CHANNEL f1 =====  
SFO1 75.4878687 MHz  
NUC1 13C  
P1 15.00 usec  
PLW1 22.00000000 W

===== CHANNEL f2 =====  
SFO2 300.1812007 MHz  
NUC2 1H  
CPDPRG2 waltz16  
PCPD2 90.00 usec  
PLW2 13.80399990 W  
PLW12 0.38343999 W  
PLW13 0.31059000 W

F2 - Processing parameters  
SI 32768  
SF 75.4803116 MHz  
WDW EM  
SSB 0  
LB 1.00 Hz  
GB 0  
PC 1.40

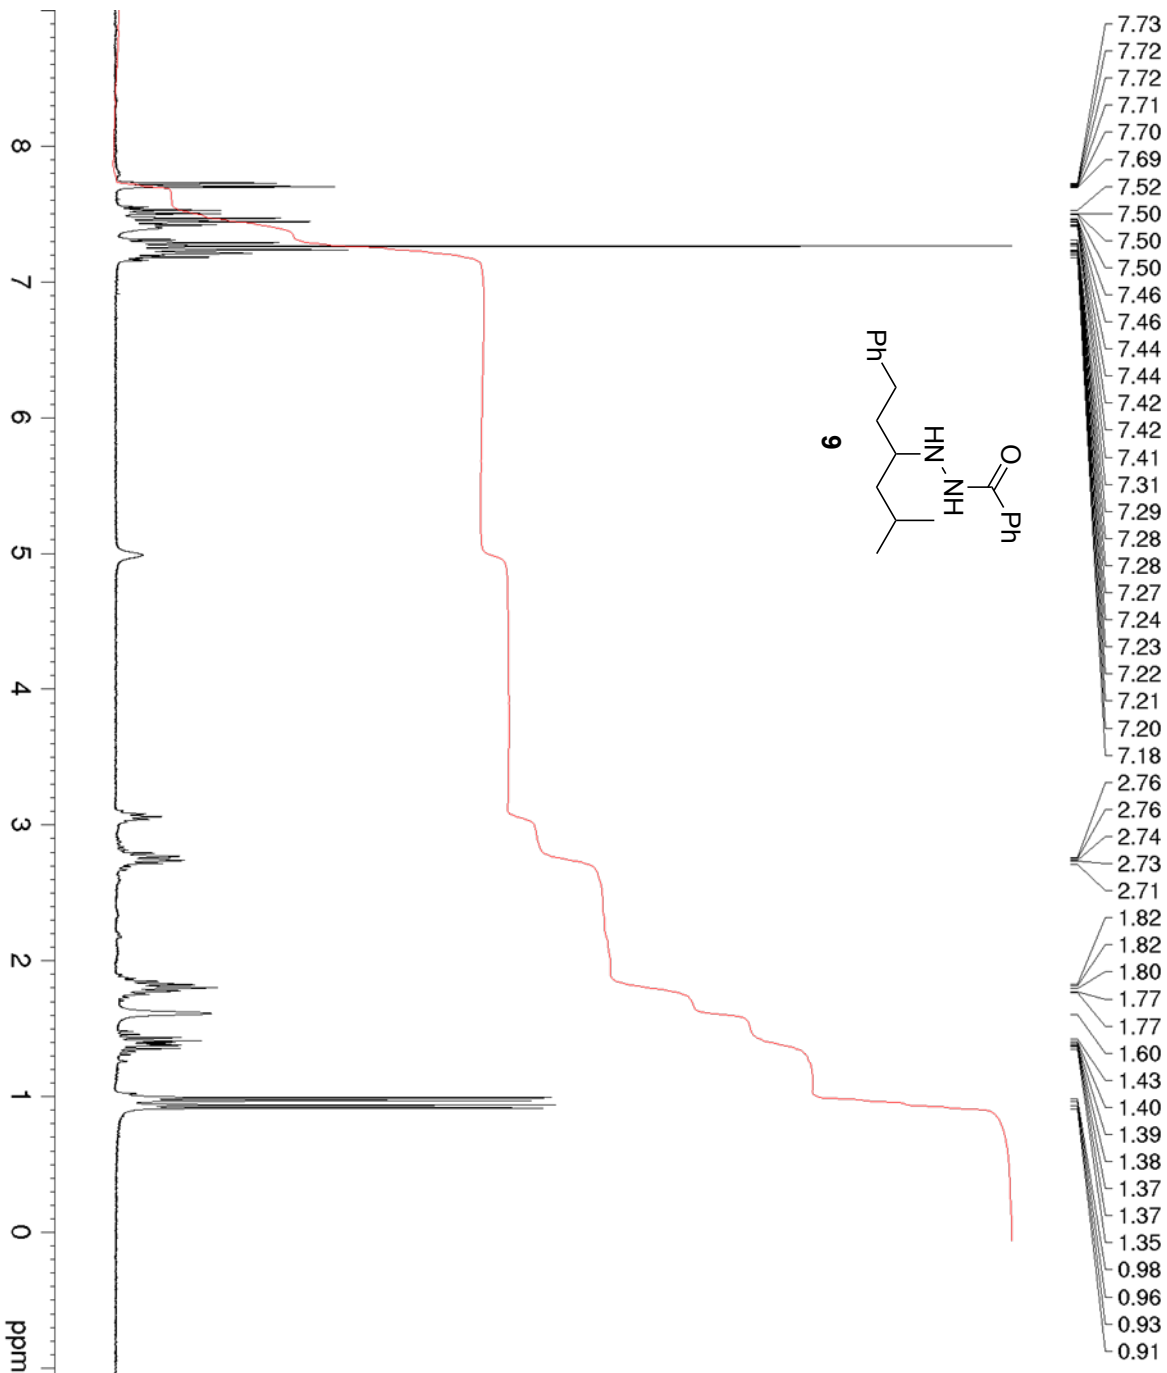

- 7.73
- 7.72
- 7.72
- 7.71
- 7.70
- 7.69
- 7.52
- 7.50
- 7.50
- 7.50
- 7.46
- 7.46
- 7.44
- 7.44
- 7.42
- 7.42
- 7.41
- 7.31
- 7.29
- 7.28
- 7.28
- 7.27
- 7.24
- 7.23
- 7.22
- 7.21
- 7.20
- 7.18
- 2.76
- 2.76
- 2.74
- 2.73
- 2.71
- 1.82
- 1.82
- 1.80
- 1.77
- 1.77
- 1.60
- 1.43
- 1.40
- 1.39
- 1.38
- 1.37
- 1.37
- 1.35
- 0.98
- 0.96
- 0.93
- 0.91

Current Data Parameters  
 NAME SC-03-210.dil  
 EXPNO 10  
 PROCNO 1

F2 - Acquisition Parameters  
 Date\_ 20190524  
 Time 13:03  
 INSTRUM FOURIER300  
 PROBHD 5 mm DUL 13C-1  
 PULPROG zg30  
 TD 65536  
 SOLVENT CDC13  
 NS 8  
 DS 0  
 SWH 6103.516 Hz  
 FIDRES 0.093132 Hz  
 AQ 5.3687091 sec  
 RG 90.4153  
 DW 81.920 usec  
 DE 6.50 usec  
 TE 294.0 K  
 D1 1.00000000 sec  
 TD0 1

===== CHANNEL f1 =====  
 SFO1 300.1818537 MHz  
 NUC1 1H  
 P1 15.00 usec  
 PLW1 13.80399990 W

F2 - Processing parameters  
 SI 65536  
 SF 300.1800051 MHz  
 WDW EM  
 SSB 0  
 LB 0.30 Hz  
 GB 0  
 PC 1.00



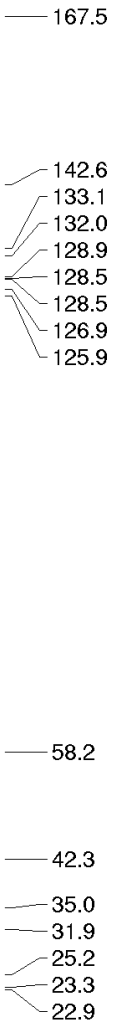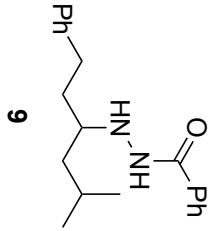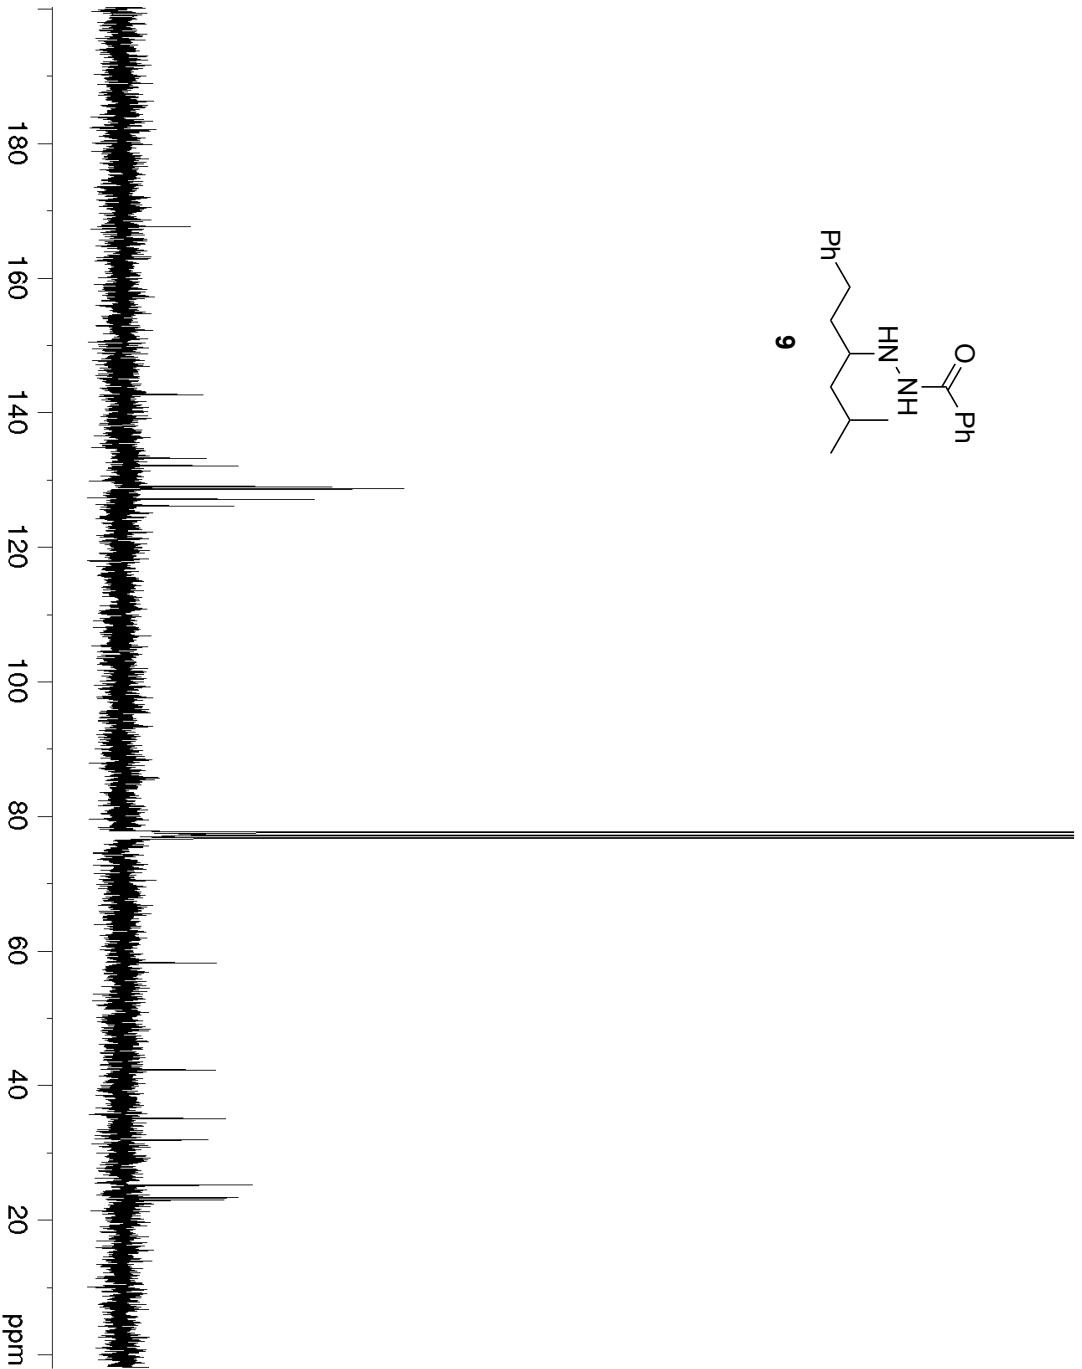

Current Data Parameters  
 NAME SC-03-210 13C II  
 EXPNO 10  
 PROCNO 1

F2 - Acquisition Parameters  
 Date\_ 20190524  
 Time 13.07

INSTRUM FOUERIER300  
 PROBHD 5 mm DUL 13C-1  
 PULPROG zgpg30  
 TD 65536  
 SOLVENT CDCl3  
 NS 780  
 DS 0

SWH 24414.063 Hz  
 FIDRES 0.372529 Hz  
 AQC 1.3421773 sec  
 RG 501.187  
 DW 20.480 usec  
 DE 6.50 usec  
 TE 294.1 K

D1 2.00000000 sec  
 D11 0.03000000 sec  
 D31 0.00001500 sec  
 D40 0.030008300 sec  
 L4 40  
 L5 57  
 P32 90.00 usec  
 TD0 1

===== CHANNEL f1 =====  
 SFO1 75.4878687 MHz  
 NUC1 13C  
 P1 15.00 usec  
 PLW1 22.00000000 W

===== CHANNEL f2 =====  
 SFO2 300.1812007 MHz  
 NUC2 1H  
 CPDPRG12 waltz16  
 PCPD2 90.00 usec  
 PLW2 13.80339990 W  
 PLW12 0.38343999 W  
 PLW13 0.31059000 W

F2 - Processing parameters  
 SI 32768  
 SF 75.4803116 MHz  
 WDW EM  
 SSB 0  
 LB 1.00 Hz  
 GB 0  
 PC 1.40

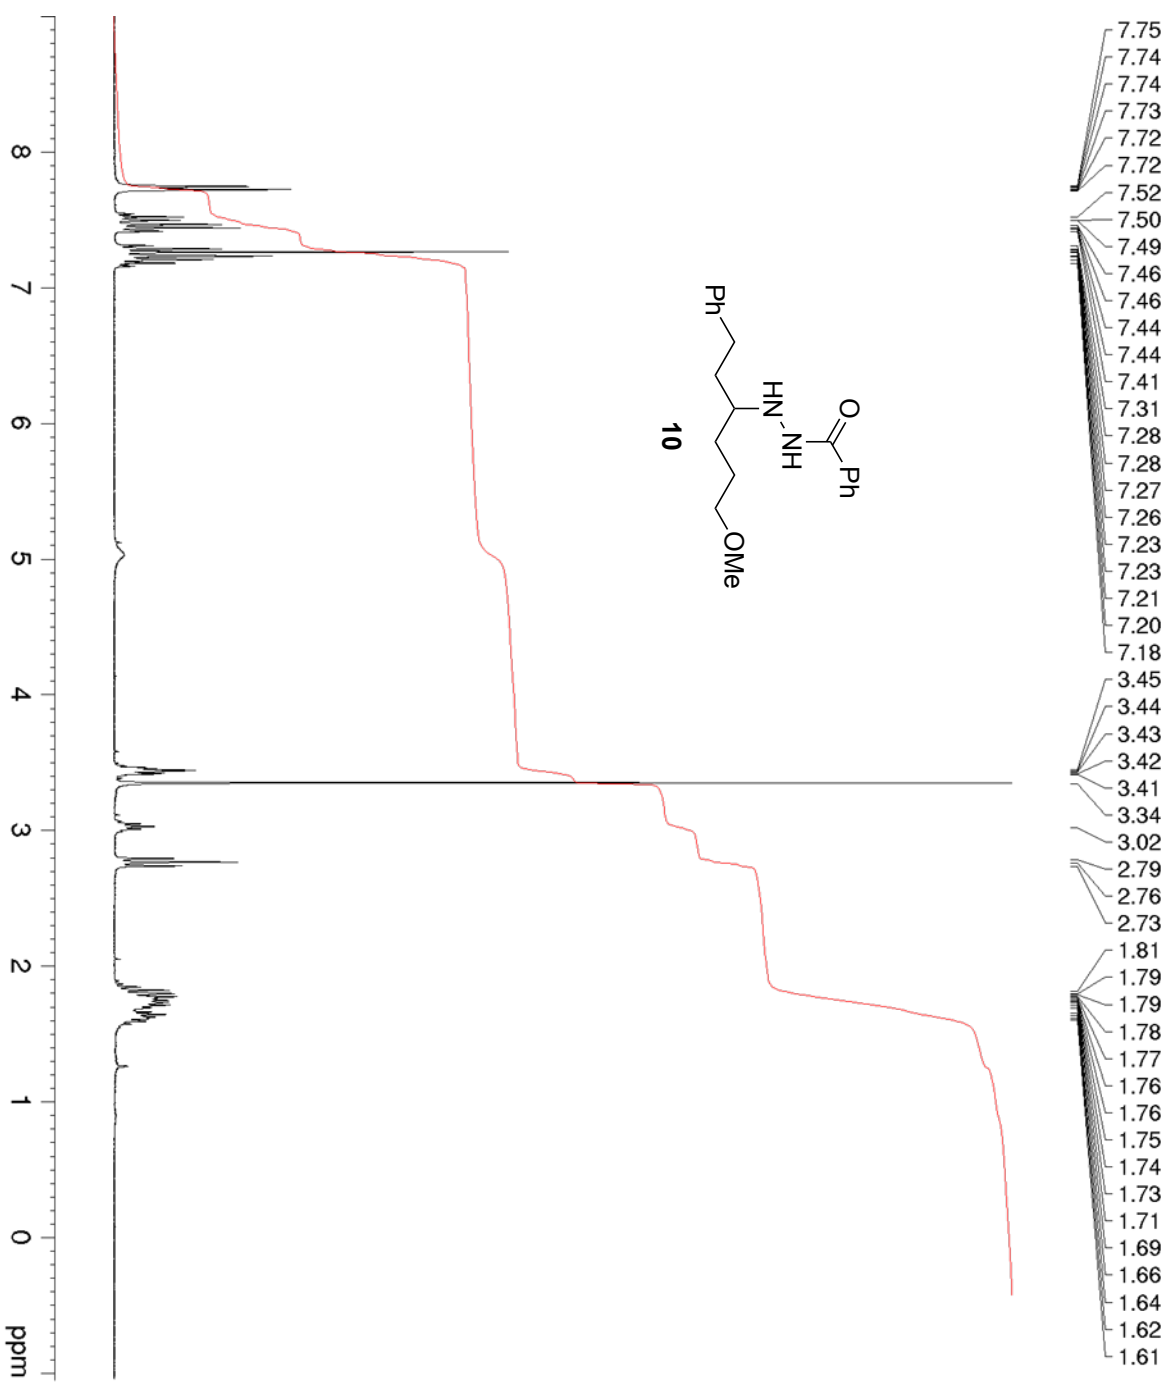

Current Data Parameters  
 NAME SC-03-211.d1  
 EXPNO 10  
 PROCNO 1

F2 - Acquisition Parameters  
 Date\_ 20190524  
 Time 13:55

INSTRUM FOUJIER300  
 PROBHD 5 mm DUL 13C-1  
 PULPROG zg30  
 TD 65536  
 SOLVENT CDC13  
 NS 8  
 DS 0  
 SWH 6103.516 Hz  
 FIDRES 0.093132 Hz  
 AQC 5.3687091 sec  
 RG 62.5742  
 DW 81.920 usec  
 DE 6.50 usec  
 TE 294.4 K  
 D1 1.00000000 sec  
 TD0 1

===== CHANNEL f1 =====  
 SFO1 300.1818537 MHz  
 NUC1 1H  
 P1 15.00 usec  
 PLW1 13.80399990 W

F2 - Processing parameters  
 SI 65536  
 SF 300.1800051 MHz  
 WDW EM  
 SSB 0  
 LB 0.30 Hz  
 GB 0  
 PC 1.00

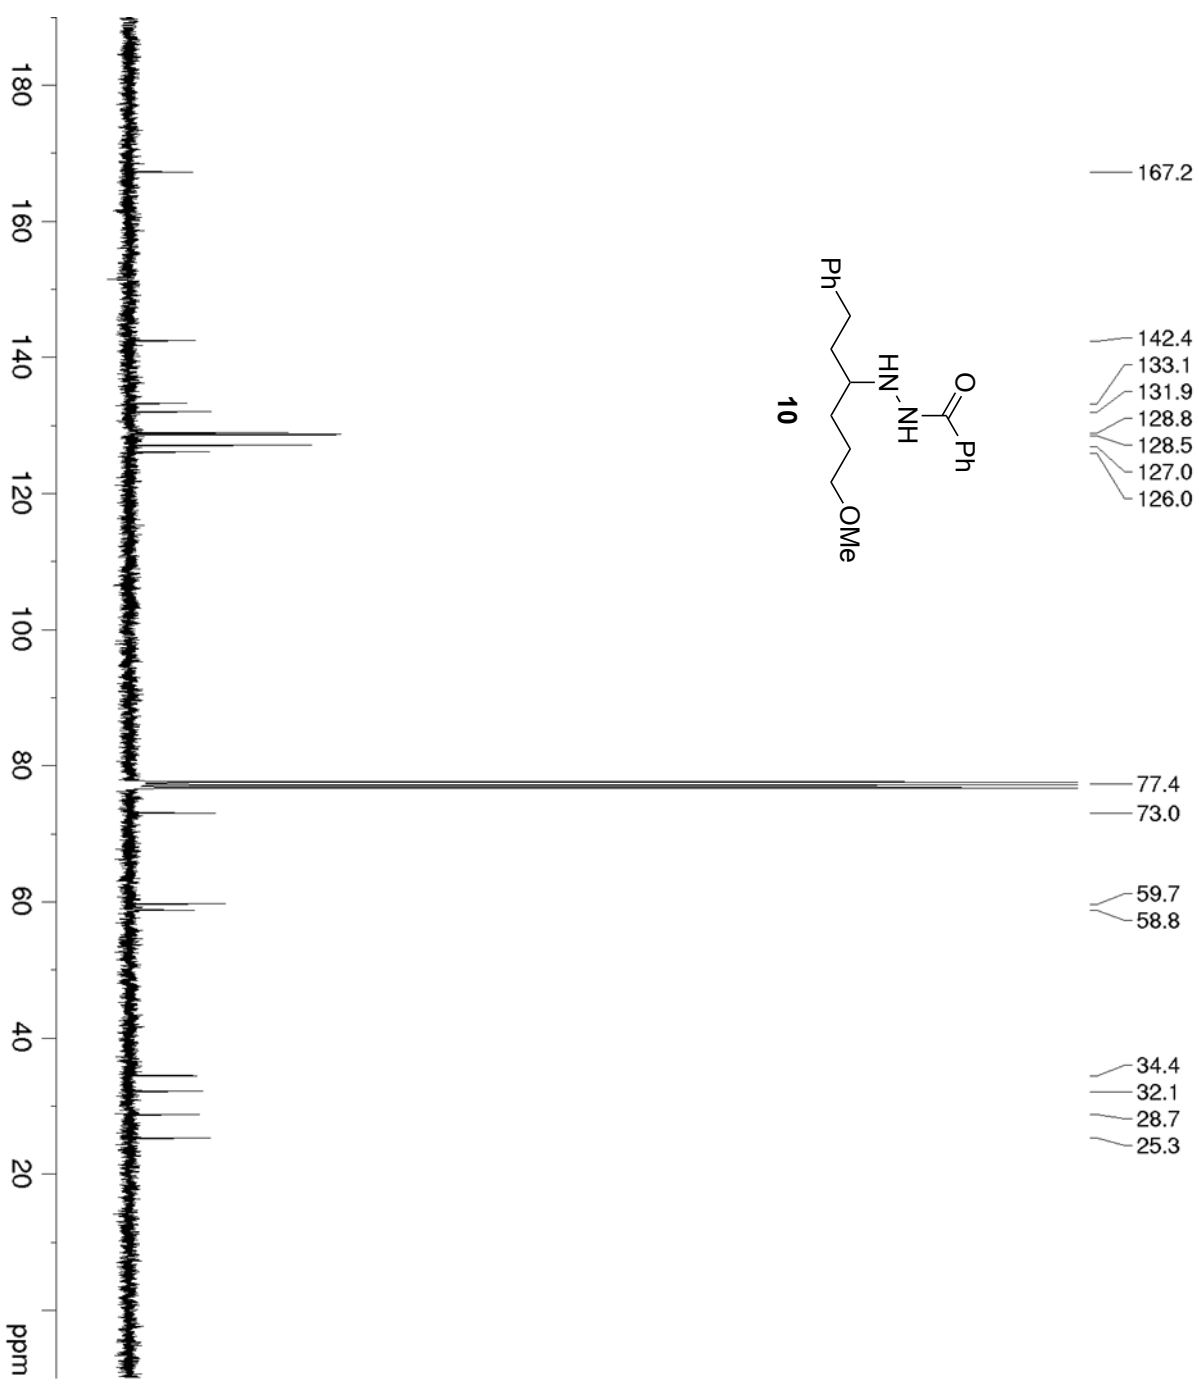

Current Data Parameters  
 NAME SC-03-211 13C  
 EXPNO 10  
 PROCNO 1

F2 - Acquisition Parameters  
 Date\_ 20190524  
 Time 13:59

INSTRUM FOUJIER300  
 PROBHD 5 mm DUL 13C-1  
 PULPROG zgpg30  
 TD 65536  
 SOLVENT CDC13  
 NS 1024

DS 0  
 SWH 24414.063 Hz  
 FIDRES 0.372529 Hz  
 AQC 1.3421773 sec  
 RG 501.187  
 DW 20.480 usec  
 DE 6.50 usec  
 TE 294.4 K

D1 2.00000000 sec  
 D11 0.03000000 sec  
 D31 0.00001500 sec  
 D40 0.03008300 sec  
 L4 40  
 L5 57  
 P32 90.00 usec  
 TDO 1

===== CHANNEL f1 =====  
 SFO1 75.4878687 MHz  
 NUC1 13C  
 P1 15.00 usec  
 PLW1 22.00000000 W

===== CHANNEL f2 =====  
 SFO2 300.1812007 MHz  
 NUC2 1H  
 CPDPRG2 waltz16  
 PCPD2 90.00 usec  
 PLW2 13.80399990 W  
 PLW12 0.38343999 W  
 PLW13 0.31059000 W

F2 - Processing parameters  
 SI 32768  
 SF 75.4803117 MHz  
 WDW EM  
 SSB 0  
 LB 1.00 Hz  
 GB 0  
 PC 1.40

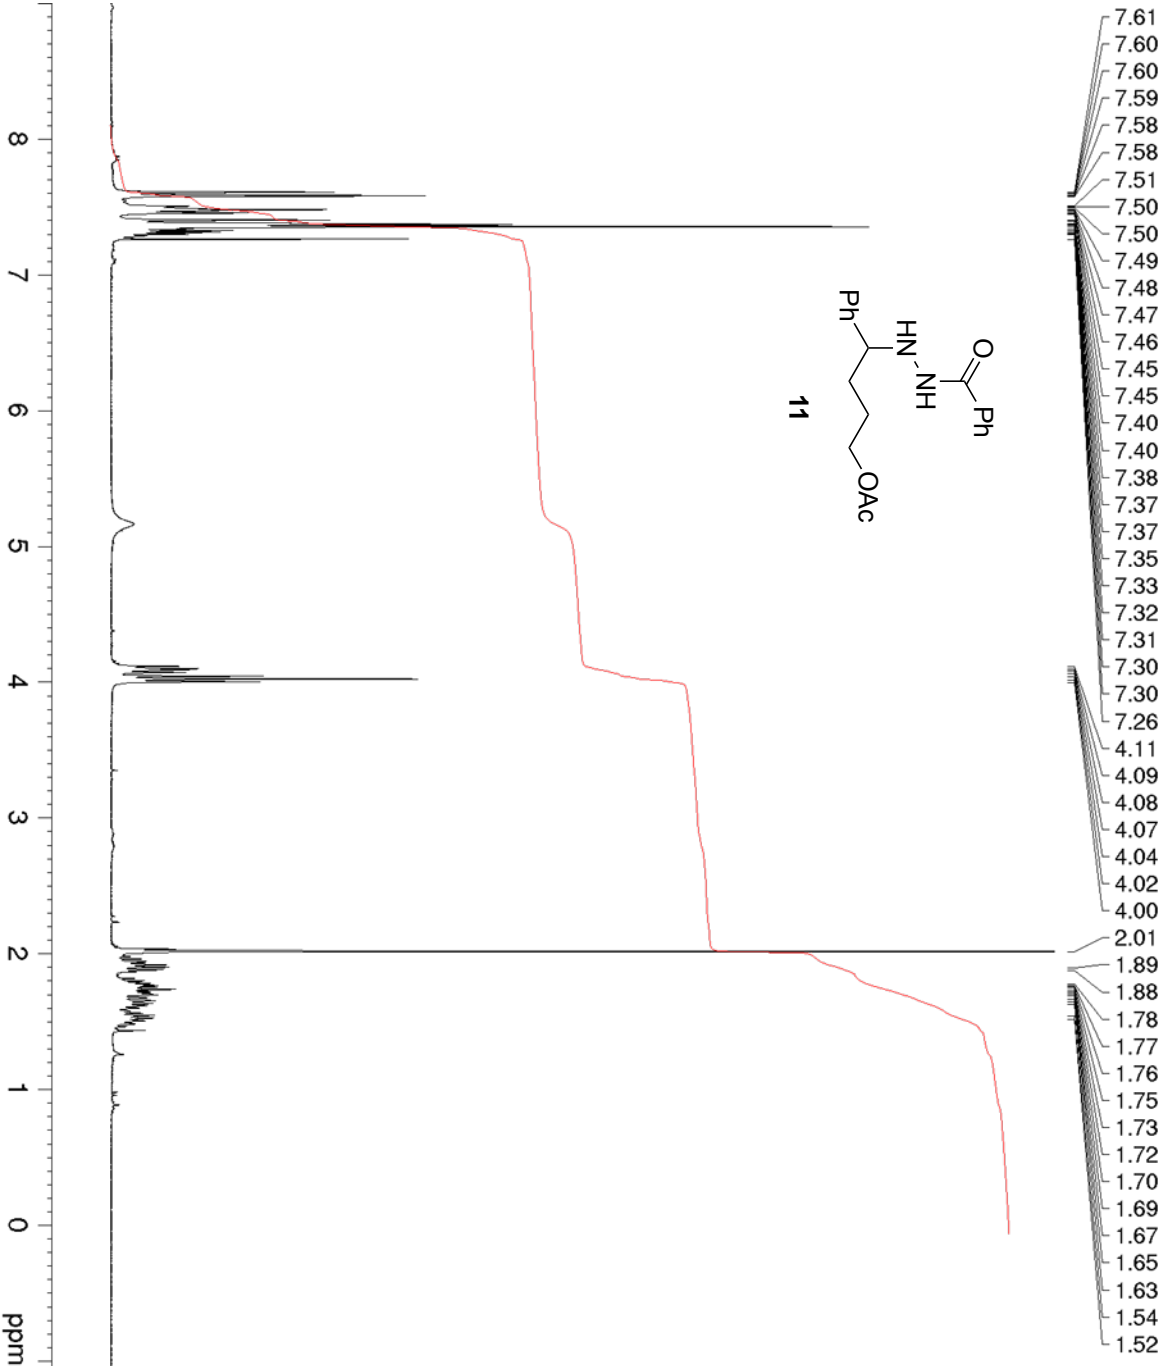

Current Data Parameters  
 NAME SC-03-AcPr radical addn a  
 EXPNO 1  
 PROCNO 1

F2 - Acquisition Parameters  
 Date\_ 20190409

Time 12:35  
 INSTRUM FOUJIER300  
 PROBHD 5 mm DUL 13C-1  
 PULPROG zg30  
 TD 65536  
 SOLVENT CDC13  
 NS 8  
 DS 0  
 SWH 6103.516 Hz  
 FIDRES 0.093132 Hz  
 AQ 5.3687091 sec  
 RG 32  
 DW 81.920 usec  
 DE 6.50 usec  
 TE 294.4 K  
 D1 1.00000000 sec  
 TD0 1

==== CHANNEL f1 =====  
 SFO1 300.1818537 MHz  
 NUC1 1H  
 P1 15.00 usec  
 PLW1 13.80399990 W

F2 - Processing parameters  
 SI 65536  
 SF 300.1800050 MHz  
 WDW EM  
 SSB 0  
 LB 0.30 Hz  
 GB 0  
 PC 1.00

171.2  
167.3  
141.3  
132.8  
131.9  
128.7  
127.9  
126.8

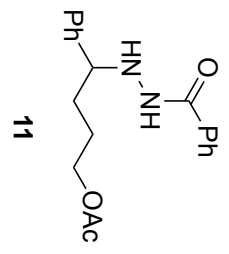

64.8  
64.2  
31.5  
25.1  
21.0

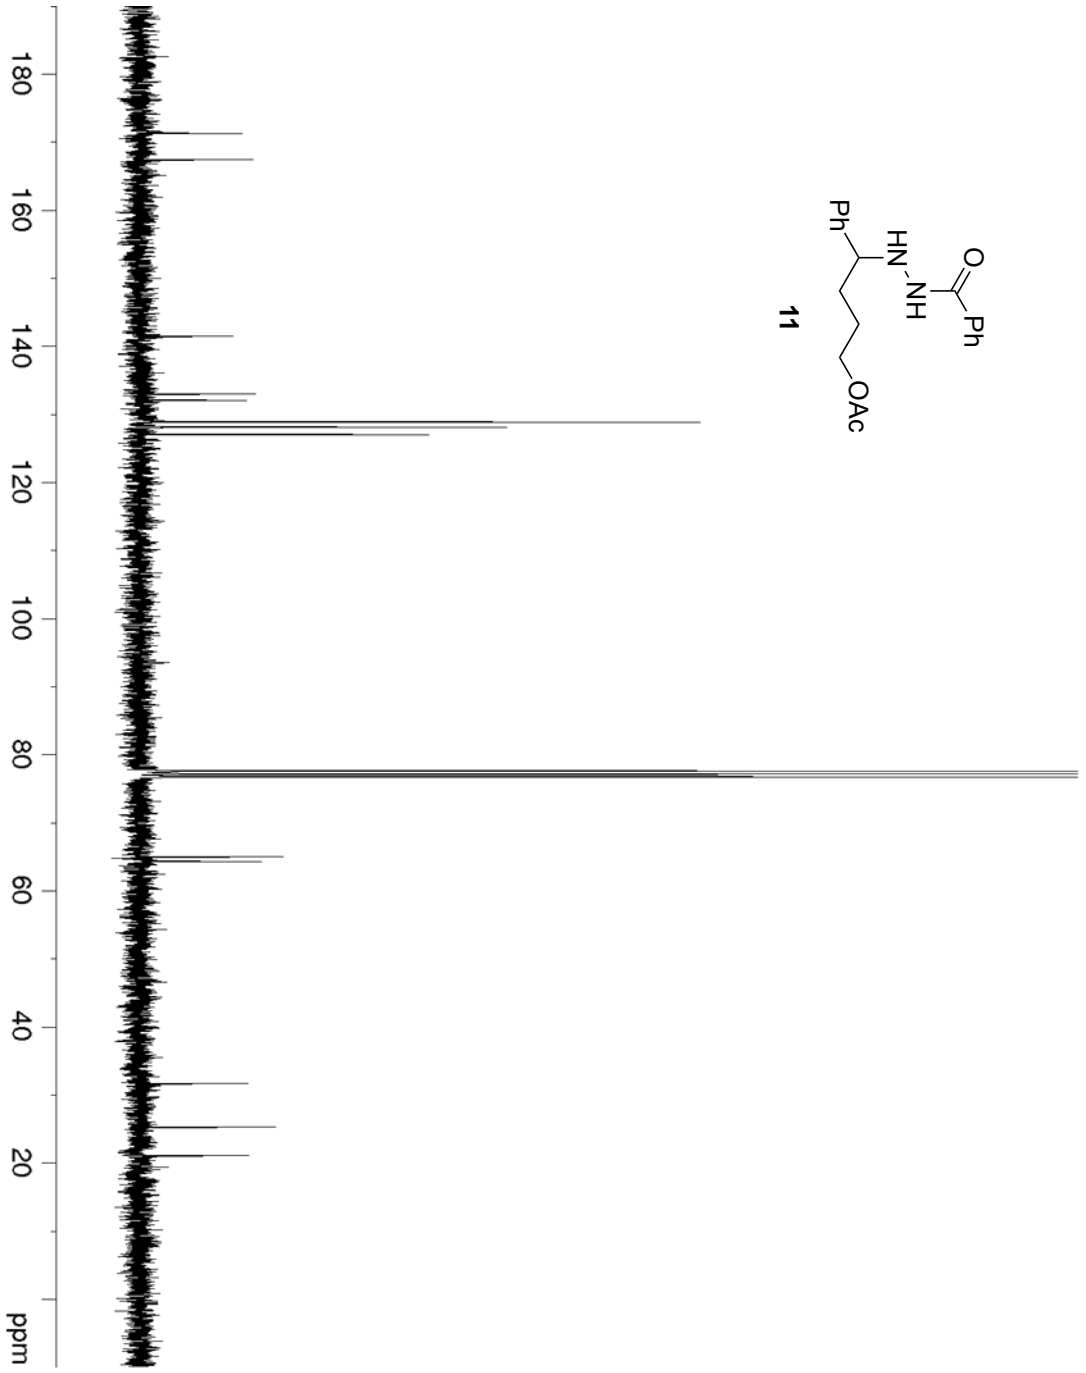

Current Data Parameters  
NAME SC-03-AcPr radical addn  
EXPNO 1  
PROCNO 1

F2 - Acquisition Parameters  
Date\_ 20190409  
Time 12.39  
INSTRUM FOUJIER300  
PROBHD 5 mm DUL 13C-1  
PULPROG zgpg30  
TD 65536  
SOLVENT CDCI3  
NS 195  
DS 4  
SWH 24414.063 Hz  
FIDRES 0.372529 Hz  
AQ 1.3421773 sec  
RG 501.187  
DW 20.480 usec  
DE 6.50 usec  
TE 294.6 K  
D1 2.00000000 sec  
D11 0.03000000 sec  
D31 0.00001500 sec  
D40 0.03008300 sec  
L4 40  
L5 57  
P32 90.00 usec  
TDO 1

==== CHANNEL f1 =====  
SFO1 75.4878687 MHz  
NUC1 13C  
P1 15.00 usec  
PLW1 22.00000000 W

==== CHANNEL f2 =====  
SFO2 300.1812007 MHz  
NUC2 1H  
CPDPRG2 waltz16  
PCPD2 90.00 usec  
PLW2 13.80399990 W  
PLW12 0.38343999 W  
PLW13 0.31059000 W

F2 - Processing parameters  
SI 32768  
SF 75.4803132 MHz  
WDW EM  
SSB 0  
LB 1.00 Hz  
GB 0  
PC 1.40

7.59  
7.58  
7.52  
7.51  
7.49  
7.48  
7.46  
7.45  
7.40  
7.38  
7.35  
7.26  
7.25  
7.24  
7.19  
7.16  
7.03  
5.22  
4.55  
1.68  
1.65  
0.98  
0.96  
0.94

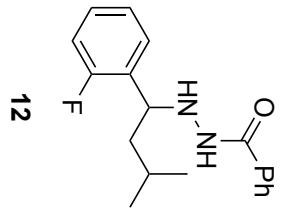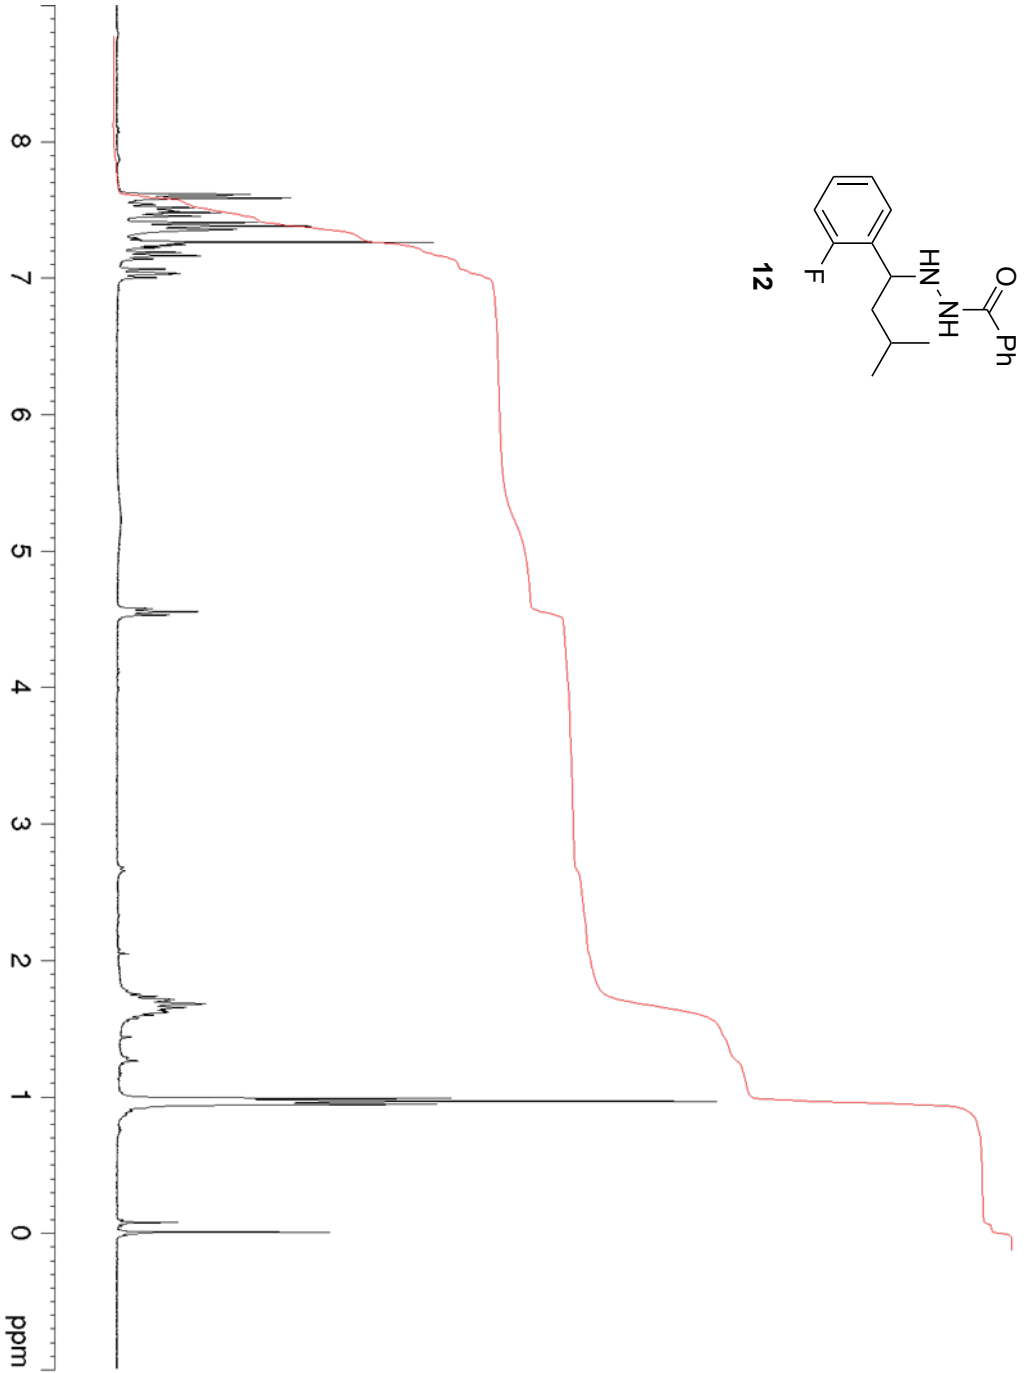

Current Data Parameters  
NAME SC-03-156 purified  
EXPNO 1  
PROCNO 1

F2 - Acquisition Parameters  
Date\_ 20190219  
Time 16:38

INSTRUM spect  
PROBHD 5 mm QNP 1H/13  
PULPROG zg30  
TD 32768  
SOLVENT CDCl3  
NS 8  
DS 0

SWH 5995.204 Hz  
FIDRES 0.182959 Hz  
AQ 2.7328513 sec  
RG 812.7

DW 83.400 usec  
DE 6.50 usec  
TE 300.0 K  
D1 0.01000000 sec  
TD0 1

===== CHANNEL f1 =====  
NUC1 1H  
P1 9.00 usec  
PL1 -0.50 dB  
SFO1 300.1524012 MHz

F2 - Processing parameters  
SI 16384  
SF 300.1500050 MHz  
WDW EM  
SSB 0  
LB 0.30 Hz  
GB 0  
PC 1.00

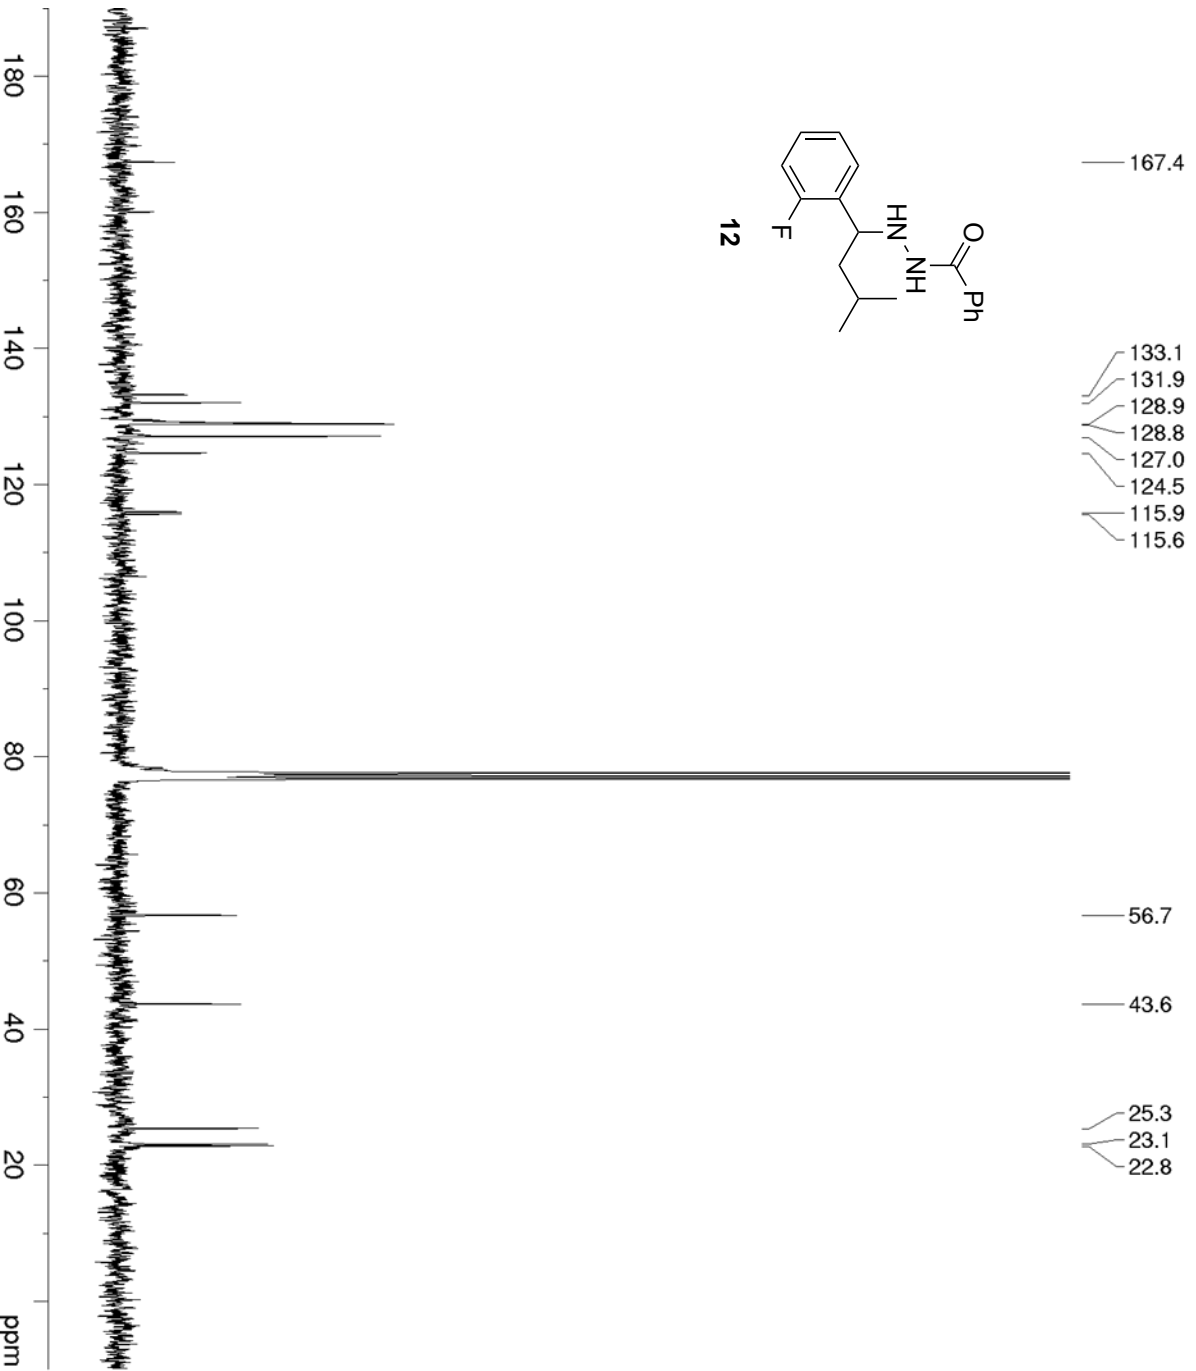

Current Data Parameters  
 NAME SC-03-156 13C  
 EXPNO 2  
 PROCNO 1

F2 - Acquisition Parameters  
 Date\_ 20190219  
 Time 18.03

INSTRUM spect  
 PROBHD 5 mm QNP 1H/13  
 PULPROG zgpg30  
 TD 65536  
 SOLVENT CDC13  
 NS 2316

DS 0  
 SWH 19960.080 Hz  
 FIDRES 0.304567 Hz  
 AQ 1.6416768 sec  
 RG 14596.5  
 DW 25.050 usec  
 DE 6.50 usec  
 TE 300.0 K  
 D1 0.35830000 sec  
 d11 0.030000000 sec  
 TD0 1

==== CHANNEL f1 =====  
 NUC1 13C  
 P1 9.50 usec  
 PL1 0 dB  
 SFO1 75.4803253 MHz

==== CHANNEL f2 =====  
 CPDPRG12 waltz16  
 NUC2 1H  
 PCPD2 87.00 usec  
 PL2 0 dB  
 PL12 20.00 dB  
 SFO2 300.1512006 MHz

F2 - Processing parameters  
 SI 32768  
 SF 75.4727655 MHz  
 WDW EM  
 SSB 0  
 LB 3.50 Hz  
 GB 0  
 PC 1.40

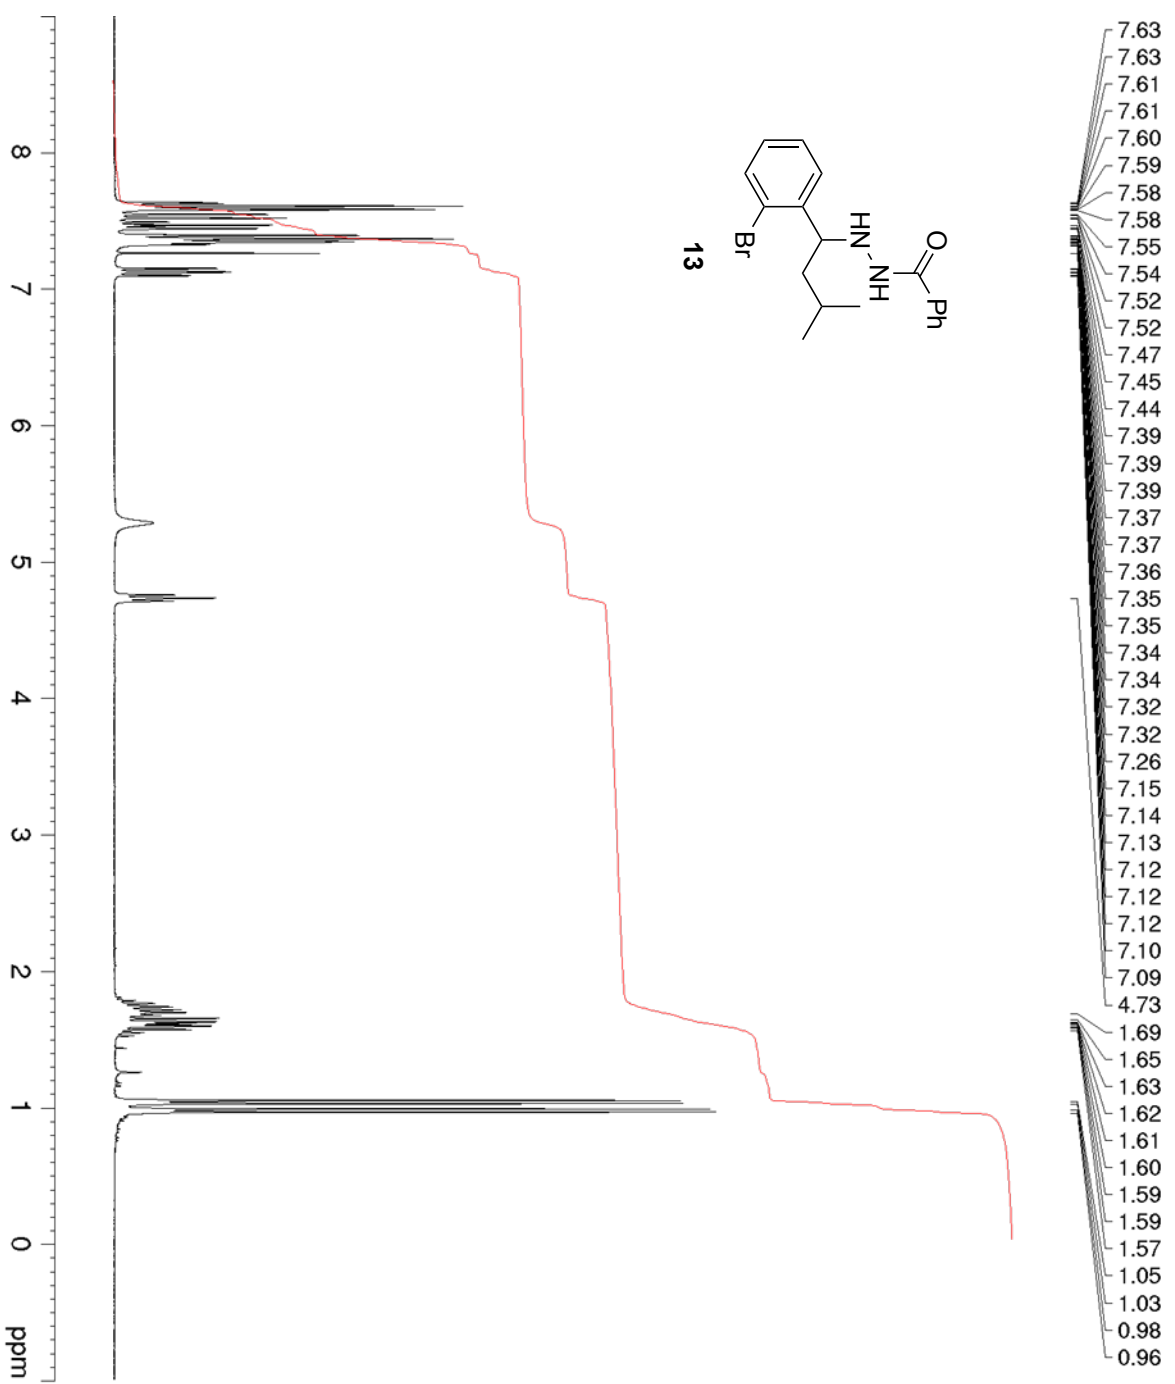

7.63  
7.63  
7.61  
7.60  
7.59  
7.58  
7.58  
7.55  
7.54  
7.52  
7.52  
7.47  
7.45  
7.44  
7.39  
7.39  
7.39  
7.37  
7.37  
7.36  
7.35  
7.35  
7.34  
7.34  
7.32  
7.32  
7.26  
7.15  
7.14  
7.13  
7.12  
7.12  
7.10  
7.09  
4.73  
1.69  
1.65  
1.63  
1.62  
1.61  
1.60  
1.59  
1.59  
1.57  
1.05  
1.03  
0.98  
0.96

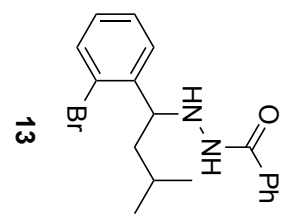

Current Data Parameters  
 NAME SC-03-215 1H hivac  
 EXPNO 1  
 PROCNO 1

F2 - Acquisition Parameters  
 Date\_ 20190610  
 Time 10:37

INSTRUM FOUJIER300  
 PROBHD 5 mm DUL 13C-1  
 PULPROG zg30  
 TD 65536  
 SOLVENT CDC13  
 NS 8  
 DS 0

SWH 6103.516 Hz  
 FIDRES 0.093132 Hz  
 AQ 5.3687091 sec  
 RG 32  
 DW 81.920 usec  
 DE 6.50 usec  
 TE 294.6 K  
 D1 1.00000000 sec  
 TD0 1

==== CHANNEL f1 =====  
 SFO1 300.1818537 MHz  
 NUC1 1H  
 P1 15.00 usec  
 PLW1 13.80399990 W

F2 - Processing parameters  
 SI 65536  
 SF 300.1800050 MHz  
 WDW EM  
 SSB 0  
 LB 0.30 Hz  
 GB 0  
 PC 1.00



167.4  
 141.8  
 133.0  
 131.8  
 128.9  
 128.7  
 128.7  
 127.9  
 127.0  
 125.1

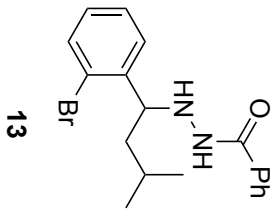

61.7  
 44.2  
 25.4  
 23.4  
 22.6

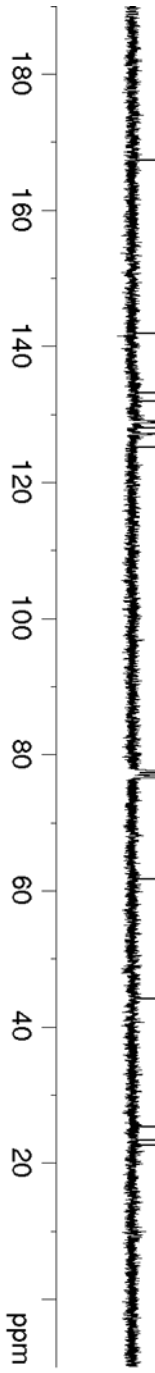

Current Data Parameters  
 NAME SC-03-215 13C  
 EXPNO 1  
 PROCNO 1

F2 - Acquisition Parameters  
 Date\_ 20190610  
 Time 10:42  
 INSTRUM FOUJIER300  
 PROBHD 5 mm DUL 13C-1  
 PULPROG zgpg30  
 TD 65536  
 SOLVENT CDC13  
 NS 635  
 DS 4  
 SWH 24414.063 Hz  
 FIDRES 0.372529 Hz  
 AQ 1.3421773 sec  
 RG 501.187  
 DW 20.480 usec  
 DE 6.50 usec  
 TE 294.8 K  
 D1 2.00000000 sec  
 D11 0.03000000 sec  
 D31 0.00001500 sec  
 D40 0.03008300 sec  
 L4 40  
 L5 57  
 P32 90.00 usec  
 TDO 1

===== CHANNEL f1 =====  
 SFO1 75.4878687 MHz  
 NUC1 13C  
 P1 15.00 usec  
 PLW1 22.00000000 W

===== CHANNEL f2 =====  
 SFO2 300.1812007 MHz  
 NUC2 1H  
 CPDPRG2 waltz16  
 PCPD2 90.00 usec  
 PLW2 13.80399990 W  
 PLW12 0.38343999 W  
 PLW13 0.31059000 W

F2 - Processing parameters  
 SI 32768  
 SF 75.4803130 MHz  
 WDW EM  
 SSB 0  
 LB 1.00 Hz  
 GB 0  
 PC 1.40

- 11.87
- 8.71
- 7.92
- 7.90
- 7.87
- 7.85
- 7.60
- 7.58
- 7.55
- 7.53
- 7.51
- 7.37
- 7.14
- 7.12
- 7.10
- 3.29
- 2.87
- 2.85
- 2.84
- 2.51
- 2.50
- 2.49
- 1.73
- 1.71
- 1.56
- 1.54

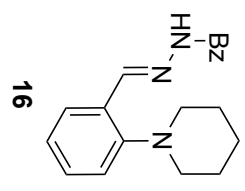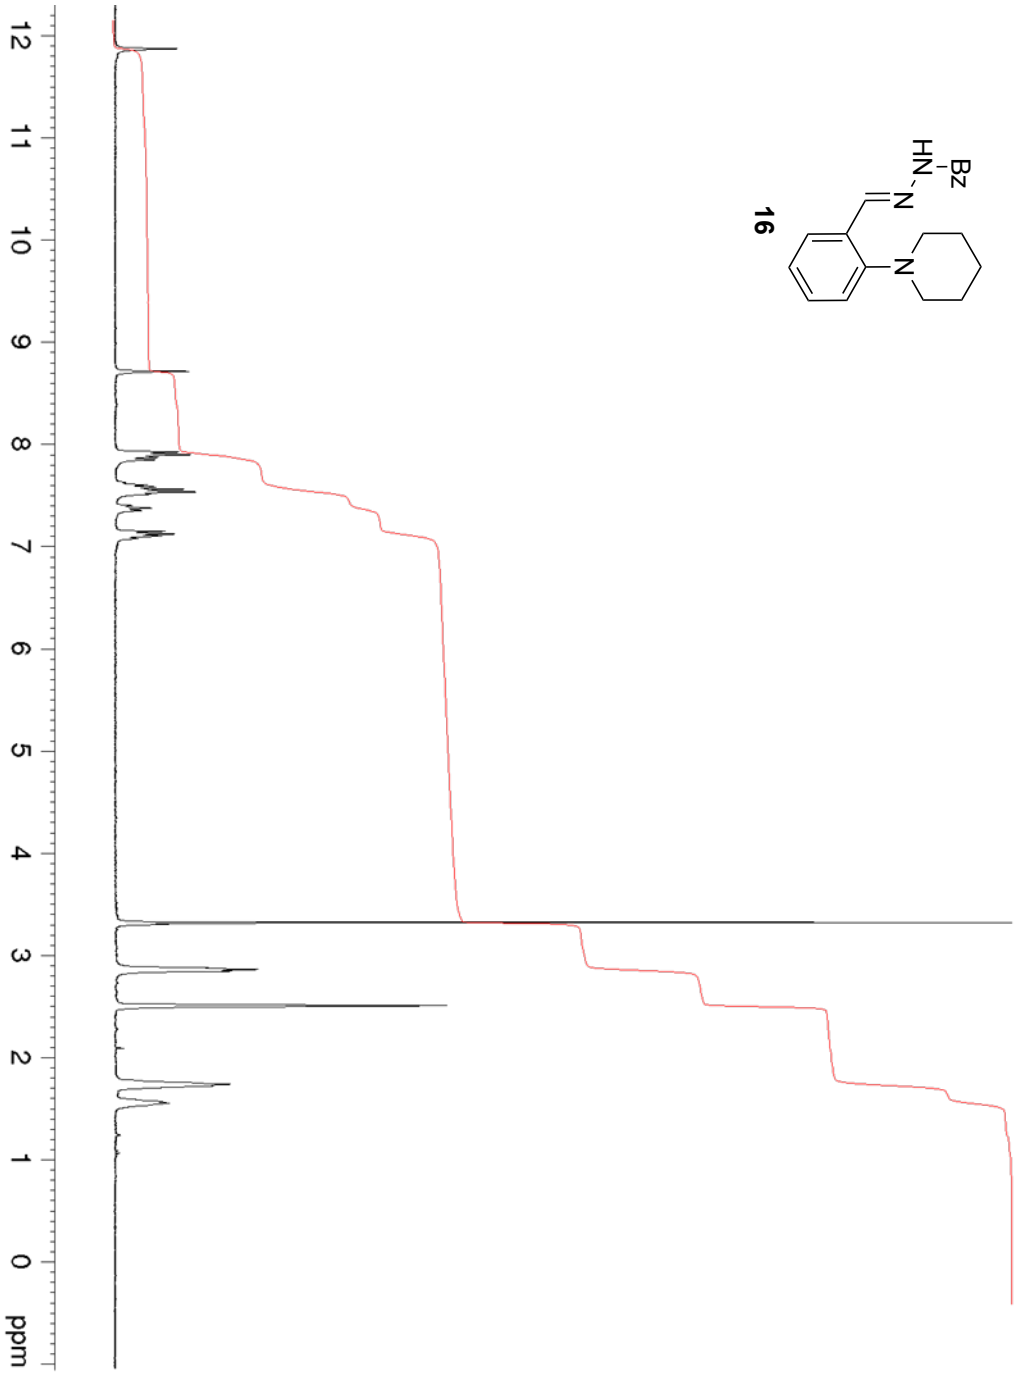

Current Data Parameters  
 NAME SC-03-208 1H  
 EXPNO 1  
 PROCNO 1

F2 - Acquisition Parameters  
 Date\_ 20190603  
 Time 13:21

INSTRUM spect  
 PROBHD 5 mm QNP 1H/13  
 PULPROG zg30  
 TD 32768  
 SOLVENT DMSO

NS 8  
 DS 0  
 SWH 5995.204 Hz  
 FIDRES 0.182959 Hz  
 AQC 2.7328513 sec  
 RG 912.3  
 DW 83.400 usec  
 DE 6.50 usec  
 TE 300.0 K  
 D1 0.01000000 sec  
 TD0 1

===== CHANNEL f1 =====  
 NUC1 1H  
 P1 9.00 usec  
 PL1 -0.50 dB  
 SFO1 300.1524012 MHz

F2 - Processing parameters  
 SI 16384  
 SF 300.1500005 MHz  
 WDW EM  
 SSB 0  
 LB 0.30 Hz  
 GB 0  
 PC 1.00

- 163.3
- 153.5
- 149.9
- 145.6
- 133.7
- 131.6
- 131.4
- 130.7
- 128.4
- 127.7
- 126.3
- 122.8
- 119.3

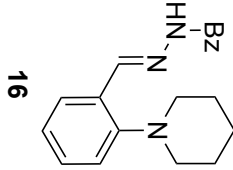

- 54.3
- 53.0
- 25.8
- 25.0
- 23.6

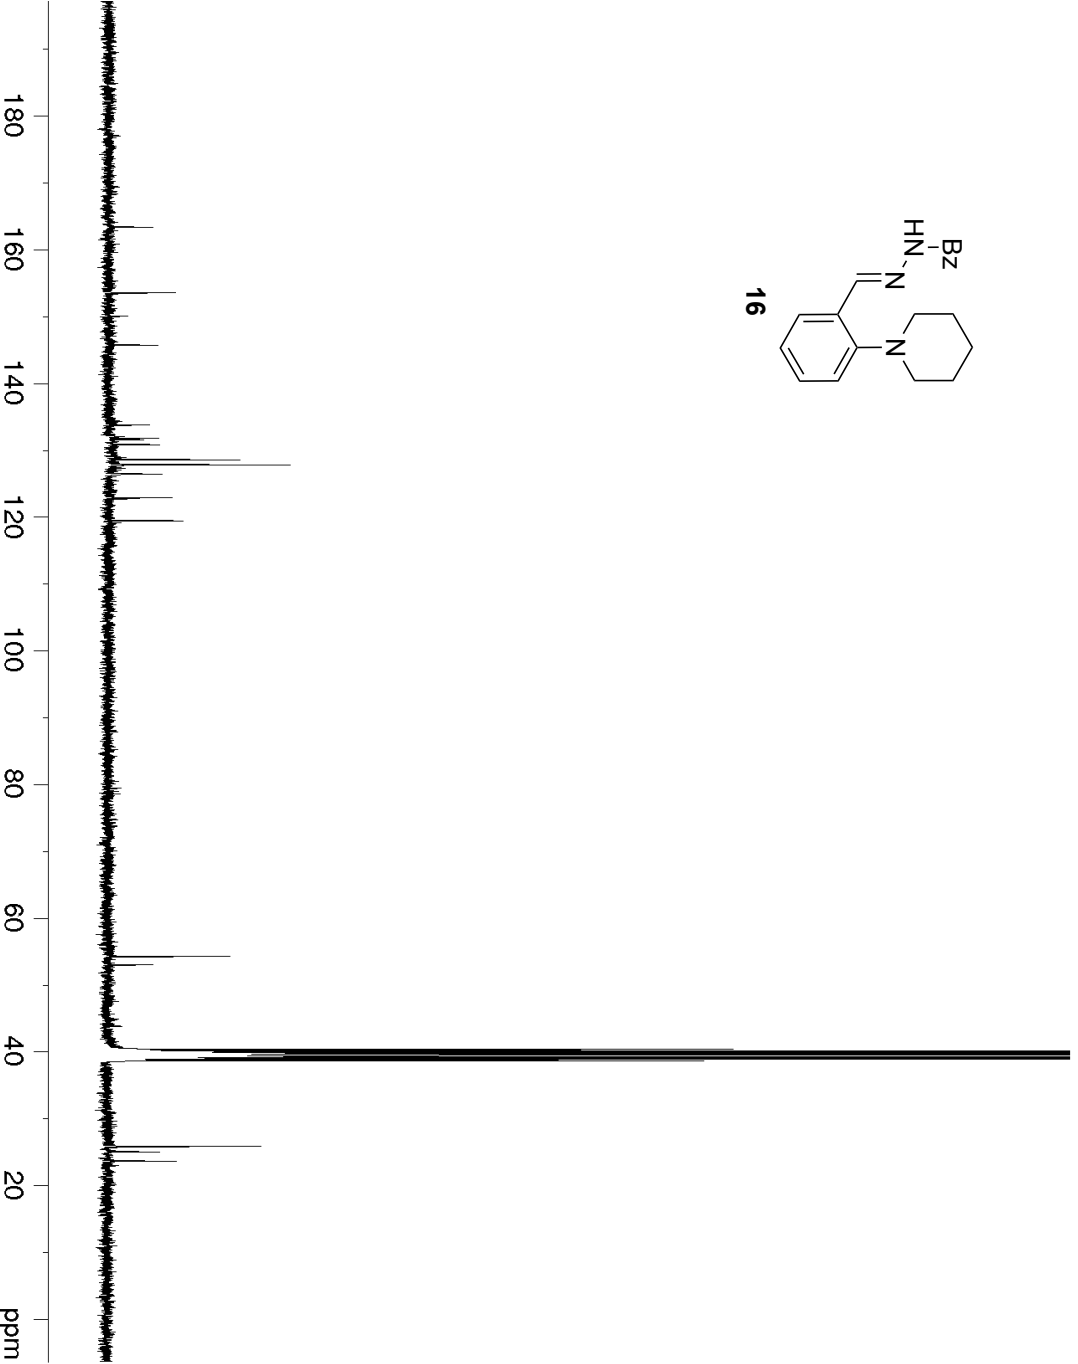

Current Data Parameters  
 NAME SC-03-208 13C conc  
 EXPNO 10  
 PROCNO 1

F2 - Acquisition Parameters

Date\_ 20190615  
 Time 14:52  
 INSTRUM FOURIER300  
 PROBHD 5 mm DUL 13C-1  
 PULPROG zgpg30  
 TD 65536  
 SOLVENT DMSO  
 NS 6500  
 DS 4  
 SWH 24414.063 Hz  
 FIDRES 0.372529 Hz  
 AQ 1.3421773 sec  
 RG 501.187  
 DW 20.480 usec  
 DE 6.50 usec  
 TE 294.4 K  
 D1 2.00000000 sec  
 D11 0.03000000 sec  
 D31 0.00001500 sec  
 D40 0.03008300 sec  
 L4 40  
 L5 57  
 P32 90.00 usec  
 TDO 1

==== CHANNEL f1 =====

SFO1 75.4878687 MHz  
 NUC1 13C  
 P1 15.00 usec  
 PLW1 22.00000000 W

==== CHANNEL f2 =====

SFO2 300.1812007 MHz  
 NUC2 1H  
 CPDPRG2 waltz16  
 PCPD2 90.00 usec  
 PLW2 13.80399990 W  
 PLW12 0.38343999 W  
 PLW13 0.31059000 W

F2 - Processing parameters

SI 32768  
 SF 75.4803557 MHz  
 WDW EM  
 SSB 0  
 LB 1.00 Hz  
 GB 0  
 PC 1.40

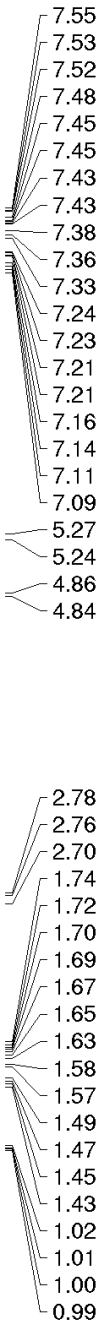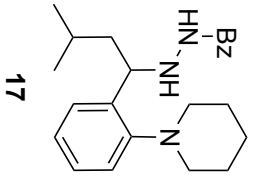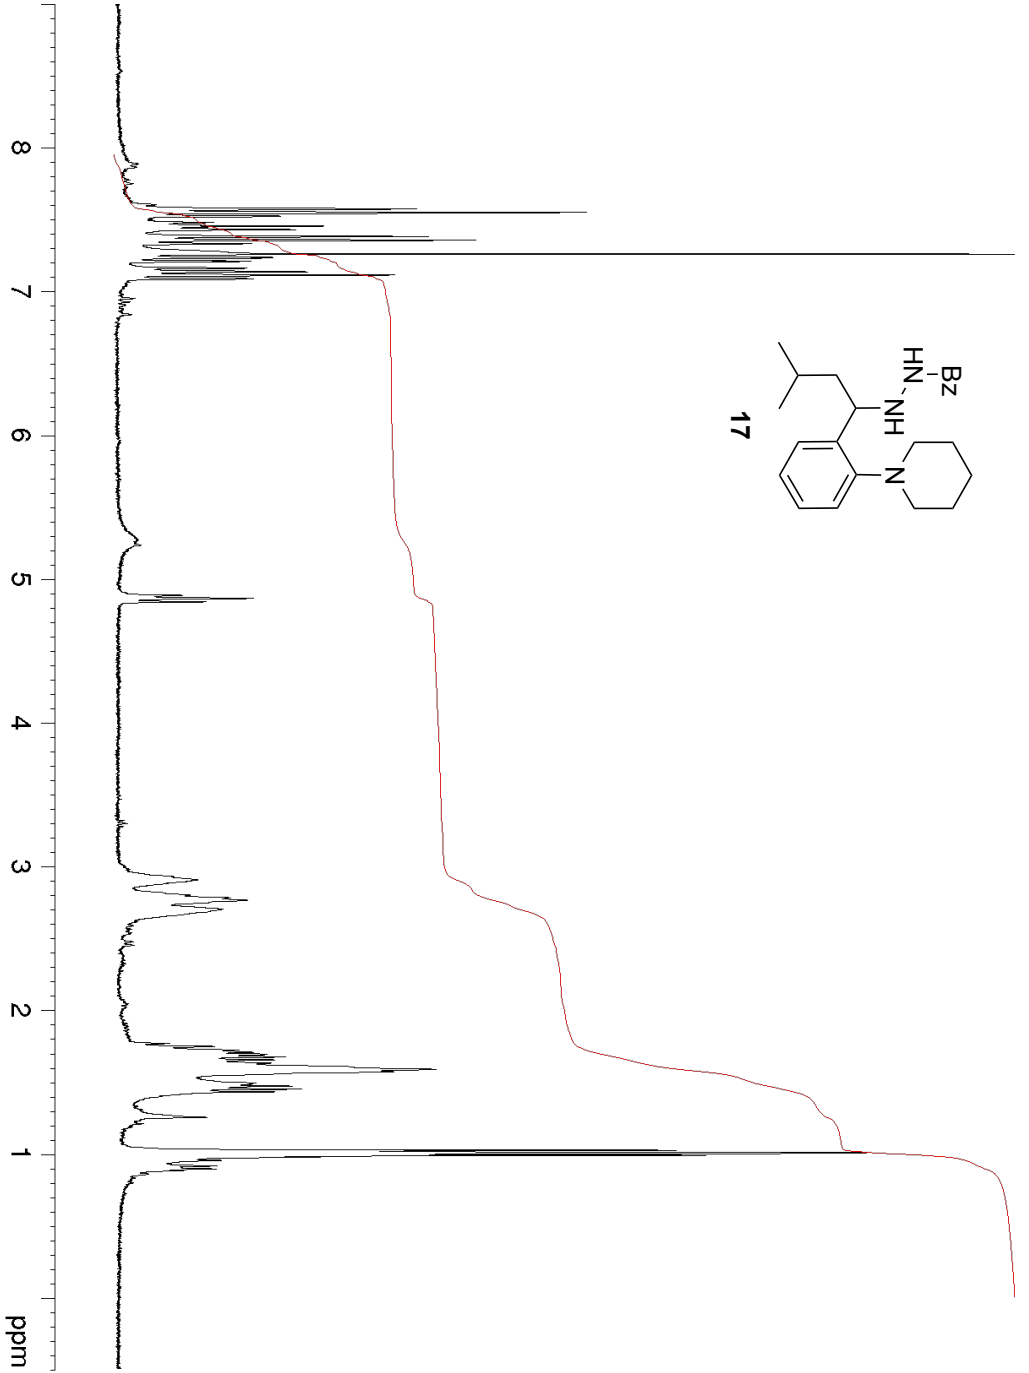

Current Data Parameters  
 NAME SC-03-209 purified rshimr  
 EXPNO 1  
 PROCNO 1

F2 - Acquisition Parameters  
 Date\_ 20190521  
 Time 16.48

INSTRUM FURIER300  
 PROBHD 5 mm DUL 13C-1  
 PULPROG zg30  
 TD 65536  
 SOLVENT CDCl3  
 NS 8  
 DS 0  
 SWH 6103.516 Hz  
 FIDRES 0.093132 Hz  
 RG 66.2649  
 AQ 5.3687091 sec  
 DW 81.920 usec  
 DE 6.50 usec  
 TE 293.7 K  
 D1 1.00000000 sec  
 TD0 1

==== CHANNEL f1 =====  
 SFO1 300.1818537 MHz  
 NUC1 1H  
 P1 15.00 usec  
 PLW1 13.80399990 W

F2 - Processing parameters  
 SI 65536  
 SF 300.1800053 MHz  
 WDW EM  
 SSB 0  
 LB 0.30 Hz  
 GB 0  
 PC 1.00

- 167.1
- 154.0
- 138.6
- 133.3
- 131.7
- 128.7
- 127.9
- 127.7
- 126.8
- 124.4
- 120.8
- 56.2
- 55.0
- 45.1
- 26.6
- 25.3
- 24.3
- 23.5
- 22.8

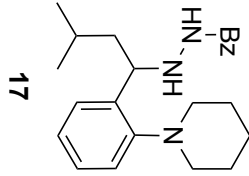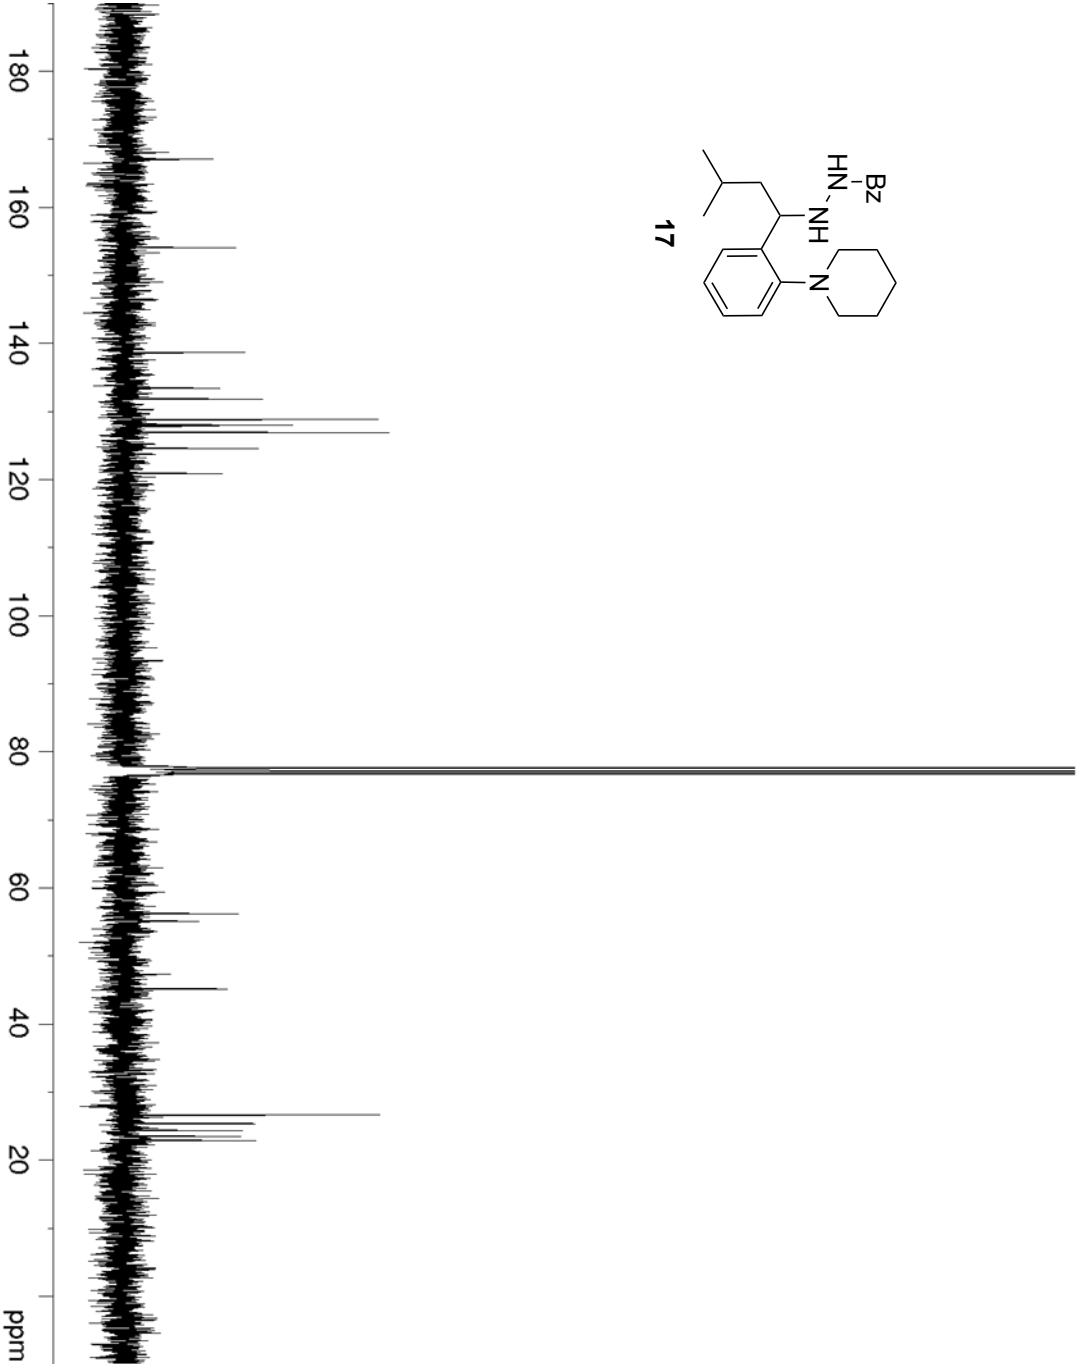

Current Data Parameters  
 NAME SC-03-209 13C  
 EXPNO 1  
 PROCNO 1

F2 - Acquisition Parameters  
 Date\_ 20190521  
 Time 18.54

INSTRUM FOURIER300  
 PROBHD 5 mm DUL 13C-1  
 PULPROG zgpg30

TD 65536  
 SOLVENT CDC13

NS 747  
 DS 4

SWH 24414.063 Hz  
 FIDRES 0.372529 Hz

AQ 1.3421773 sec  
 RG 501.187

DW 20.480 usec  
 DE 6.50 usec

TE 293.8 K  
 D1 2.00000000 sec

D11 0.03000000 sec  
 D31 0.00001500 sec

D40 0.03008300 sec  
 L4 40

L5 57  
 P32 90.00 usec  
 TDO 1

===== CHANNEL f1 =====  
 SFO1 75.4878687 MHz  
 NUC1 13C

P1 15.00 usec  
 PLW1 22.00000000 W

===== CHANNEL f2 =====  
 SFO2 300.1812007 MHz

NUC2 1H  
 CPDPRG2 waltz16

PCPD2 90.00 usec  
 PLW2 13.80399990 W

PLW12 0.38343999 W  
 PLW13 0.31059000 W

F2 - Processing parameters  
 SI 32768  
 SF 75.4803118 MHz

WDW EM  
 SSB 0

LB 1.00 Hz  
 GB 0

PC 1.40

## References

1. Cook, G. R.; Kargbo, R.; Maity, B. *Org. Lett.* **2005**, *7*, 2767.
2. Nam, T. K.; Jang, D. O. *J. Org. Chem.* **2018**, *83*, 7373.
3. Patel, N. R.; Kelly, C. B.; Jouffroy, M.; Molander, G. A. *Org. Lett.* **2016**, *18*, 764.
4. Patel, N. R.; Kelly, C. B.; Siegenfeld, A. P.; Molander, G. A. *ACS Catal.* **2017**, *7*, 1766.
5. Weiberth, F. J.; Hall, S. S. *J. Org. Chem.* **1986**, *51*, 5338.
6. Zhen, L.; Wang, J.; Xu, Q.; Sun, H.; Wen, X.; Wang, G. *Org. Lett.* **2017**, *19*, 1566.
